# Supplementary material for: Dead Pericarps of Dry Fruits Function as Long-Term Storage for Active Hydrolytic Enzymes and Other Substances That Affect Germination and Microbial Growth
Source: MDPI journal article supplement (doi:10.3390/plants6040064), 2017-12-19
Supplement: s1 [file s1]

## Supplementary Materials

# Dead Pericarps of Dry Fruits Function as Long-Term Storage for Active Hydrolytic Enzymes and Other Substances That Affect Germination and Microbial Growth

Godwin James, Buzi Raviv and Gideon Grafi \*

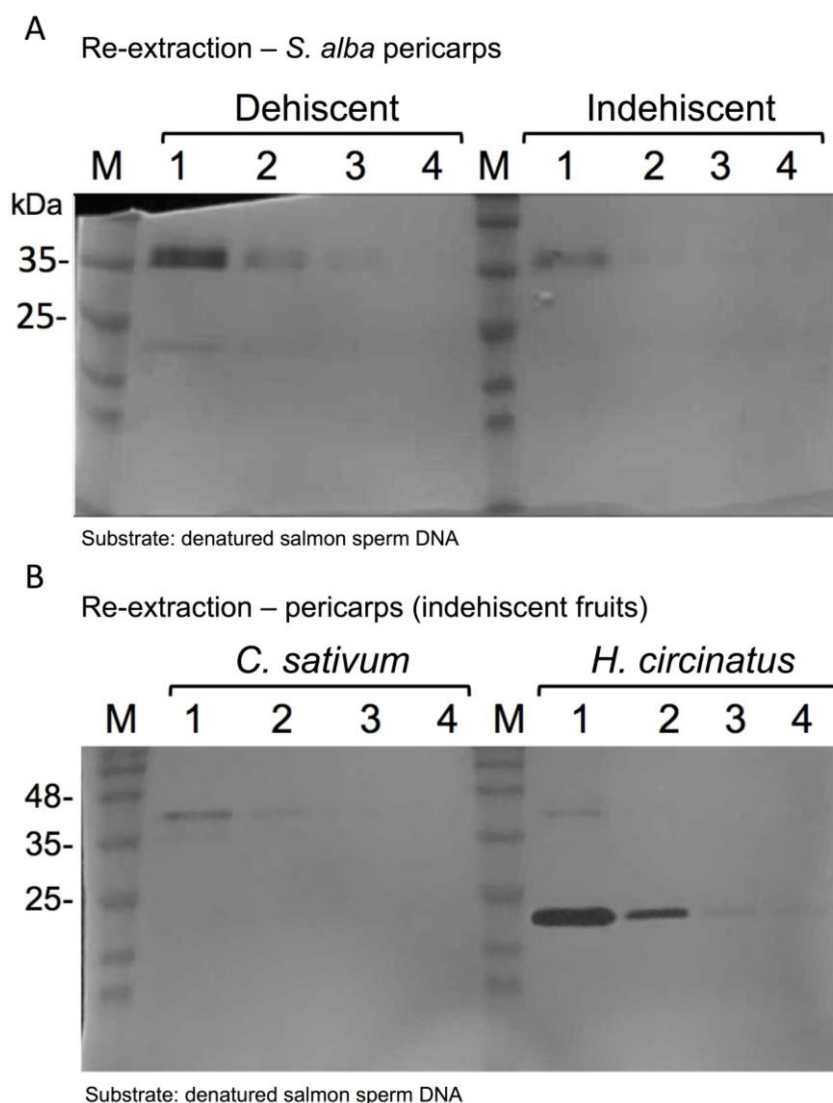

**Figure S1.** Dynamics of nuclease release from the dead pericarps. Pericarps were subjected to four repeated extraction with PBS (1-4), each extraction was for 1 h at 4 °C after which the supernatant was collected and analyzed for nuclease activity using in gel assay with denatured salmon sperm DNA. (A) Repeated extraction of *S. alba* dehiscent and indehiscent pericarps. (B) Repeated extraction of nucleases from indehiscent pericarps of *C. sativum* and *H. circinatus*. M, molecular weight protein markers.

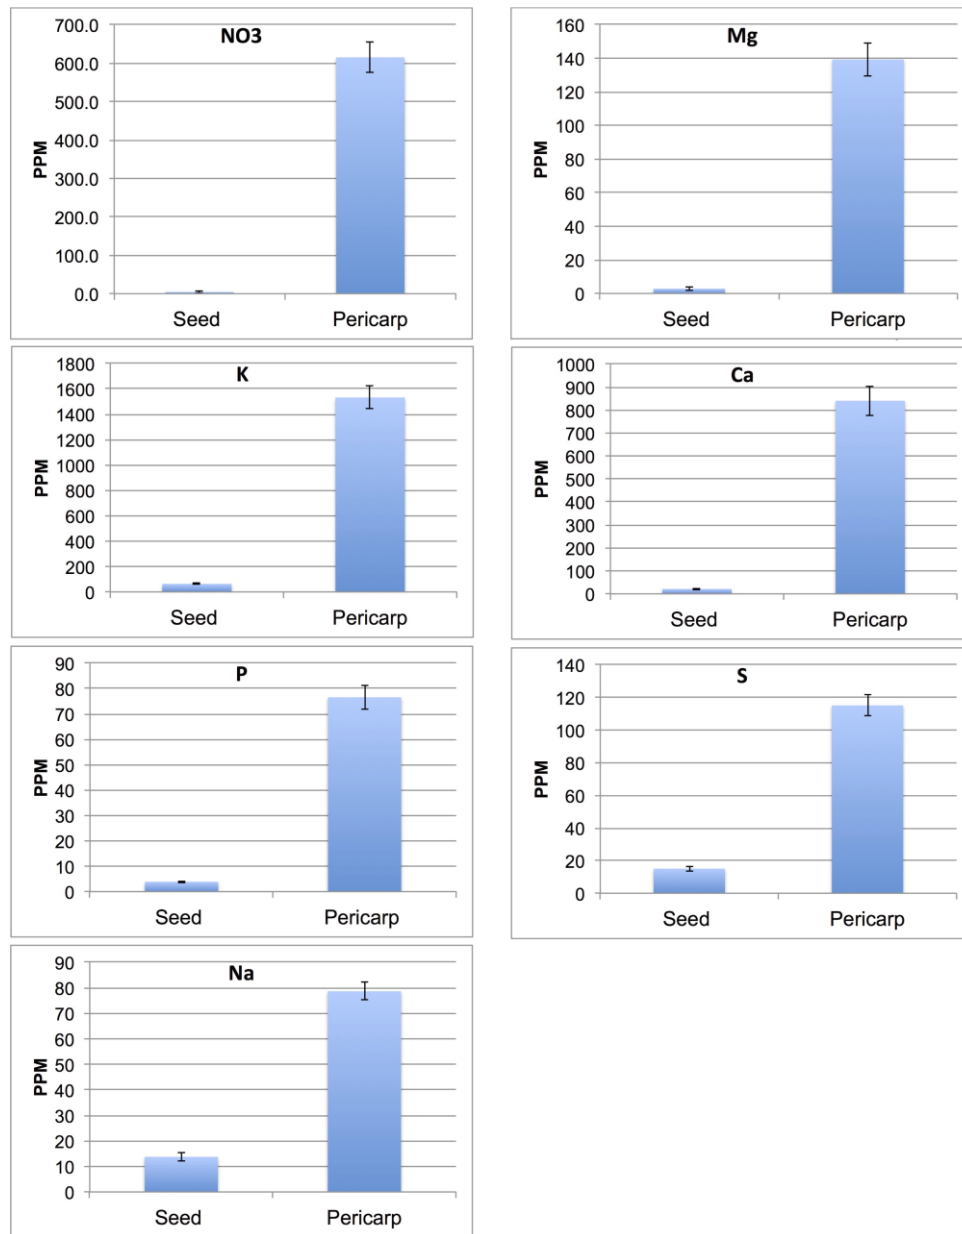

**Figure S2.** High levels of nutrients are stored and released from dead pericarps of *A. thaliana* upon hydration. Intact seeds and dehiscent pericarps were incubated in 0.8 ml PBS at 4°C for 12 h, the sup was collected and subjected to nutrient detection by ICP-OES. The concentrations (ppm) of each element detected are shown. Bars represent the standard error calculated from three measurements.

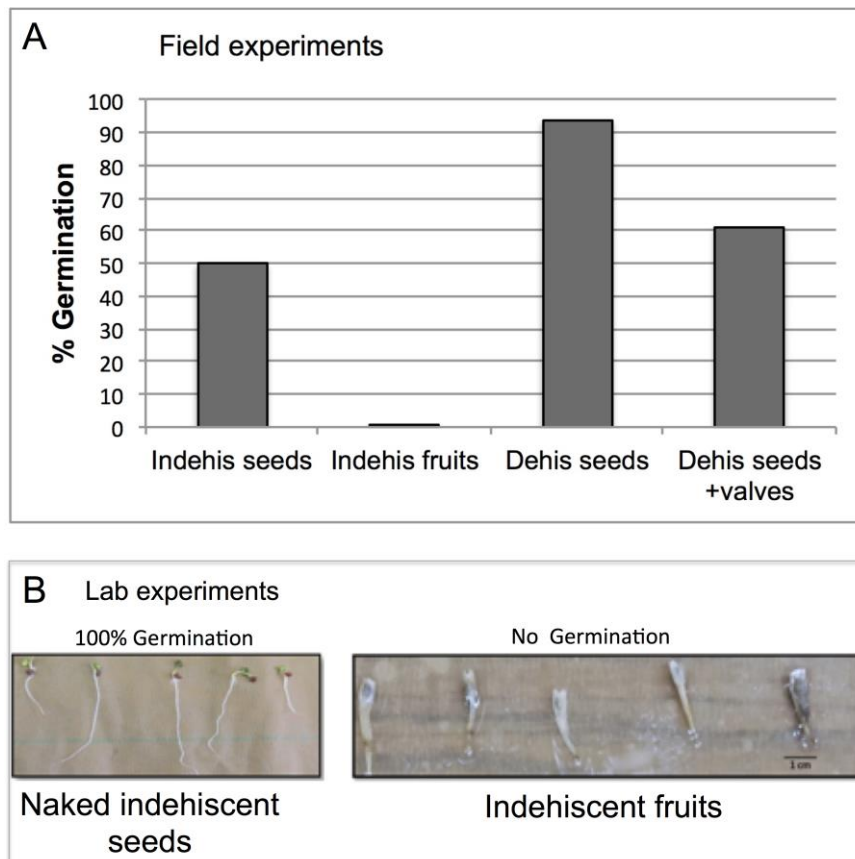

**Figure S3.** Dehiscent and indehiscent pericarps of *S. alba* contain germination inhibitory substances – Field experiments. **(A)** Field experiments were performed on loessial soil in the northern Negev (31°26'57" N / 34°39'31" E, elevation 176 m) using a 36 square grid (4x9), each square is 3x3 cm. 18 seeds or seeds with pericarps or 18 beaks containing seeds of *S. alba* were placed in a 36 square grid on loessial soil in northern Negev and germination was scored after 3 months. Note no germination observed for indehiscent fruit part of *S. alba*. **(B)** In vitro germination of naked indehiscent seeds versus indehiscent fruits.

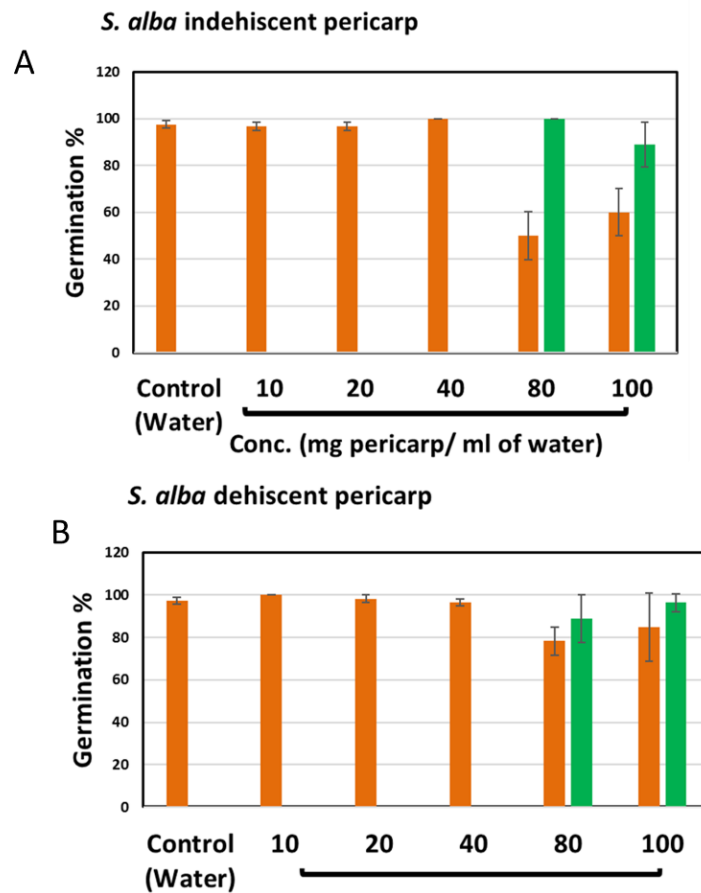

**Figure S4.** Extracts derived from indehiscent pericarp of *S. alba* inhibit germination of *Brassica rapa* seeds. **(A)** Effects of indehiscent pericarp extracts on *Brassica rapa* germination. **(B)** Effects of dehiscent pericarp extracts on *Brassica rapa* germination. Seeds of *B. rapa* were incubated in distilled water and different concentrations (10, 20, 40, 80, 100 mg pericarp/ ml of distilled water) of *S. alba* pericarp extracts. After 24 hours, the seeds treated with pericarp extracts were washed thoroughly with water and seeds were incubated for recovery germination in water. Note, seed germination was not inhibited in the presence of pericarp extracts (orange column) but fully recovered after removal of extracts (concentration 80 and 100 mg/ml) and incubation in water (green column). Data are the mean of three replicates ( $\pm$ SE).

**Table 1.** A list of plant species present in this study.

| Species name                             | Family       | Collection year  | Plant type      | Life form          | Place of collection               |
|------------------------------------------|--------------|------------------|-----------------|--------------------|-----------------------------------|
| <i>Arabidopsis thaliana</i> (L.) Col-0   | Brassicaceae | 2010             | Common lab line | Annual             | Lab line                          |
| <i>Sinapis alba</i> (L.)<br>Beassicaceae | Brassicaceae | 2014             | Wild plant      | Annual             | Northern Negev/<br>side roads     |
| <i>Hymenocarpus circinatus</i> (L.) Savi | Fabaceae     | 2016             | Wild plant      | Annual             | Northern Negev/<br>side roads     |
| <i>Spartium junceum</i> (L.)             | Fabaceae     | 2017             | Ornamental      | phanerophyte shrub | Northern Negev / local garden     |
| <i>Trigonella arabica</i> Delile         | Fabaceae     | 1973, 1986, 2016 | Wild plant      | Annual             | Negev/Midreshet Ben Gurion        |
| <i>Coriandrum sativum</i> L.             | Apiaceae     | 2016             | Cultivated      | Annual             | Local market                      |
| <i>Arachis hypogaea</i> L.               | Fabaceae     | 2016             | Cultivated      | Annual             | Local market                      |
| <i>Medicago polymorpha</i> L.            | Fabaceae     | 2016             | Wild plant      | Annual             | Negev/Midreshet Ben Gurion        |
| <i>Prosopis alba</i> Grisebach           | Fabaceae     | 2017             | Ornamental      | Perennial tree     | Negev/Midreshet Ben Gurion        |
| <i>Anastatica hierochuntica</i>          | Brassicaceae | 1968, 2017       | Wild plant      | Annual             | Sinafir islands, Dead- Sea valley |
| <i>Carrichtera annua</i>                 | Brassicaceae | 1989, 2017       | Wild plant      | Annual             | Negev/Midreshet Ben Gurion        |

**Table S2.** A list of pectinesterases and polygalacturonases released from *S. Alba* indehiscent pericarps upon hydration (proteome analysis).

| Accession      | Description                                                                                      |
|----------------|--------------------------------------------------------------------------------------------------|
| XP_018472786.1 | pectinesterase/pectinesterase inhibitor 17 [ <i>Raphanus sativus</i> ]                           |
| XP_018440051.1 | pectinesterase/pectinesterase inhibitor 17 [ <i>Raphanus sativus</i> ]                           |
| XP_013675925.1 | pectinesterase/pectinesterase inhibitor 3-like [ <i>Brassica napus</i> ]                         |
| XP_013675925.1 | pectinesterase/pectinesterase inhibitor 3-like [ <i>Brassica napus</i> ]                         |
| XP_018440779.1 | pectinesterase/pectinesterase inhibitor 3-like [ <i>Raphanus sativus</i> ]                       |
| XP_013644096.1 | pectinesterase/pectinesterase inhibitor 3-like [ <i>Brassica napus</i> ]                         |
| XP_013622811.1 | pectinesterase/pectinesterase inhibitor 3-like [ <i>Brassica oleracea</i> var. <i>oleracea</i> ] |
| XP_018467447.1 | pectinesterase/pectinesterase inhibitor 18, partial [ <i>Raphanus sativus</i> ]                  |
| XP_013664232.1 | probable pectinesterase/pectinesterase inhibitor 44 isoform X5 [ <i>Brassica napus</i> ]         |
| XP_009116452.1 | polygalacturonase ADPG1 isoform X2 [ <i>Brassica rapa</i> ]                                      |
| XP_018444632.1 | polygalacturonase ADPG1 [ <i>Raphanus sativus</i> ]                                              |
| XP_018489829.1 | polygalacturonase ADPG1 [ <i>Raphanus sativus</i> ]                                              |

**Table S3.** A list of ROS detoxifying enzymes released from *S. Alba* indehiscent pericarps upon hydration (proteome analysis).

| Accession      | Description                                                     |
|----------------|-----------------------------------------------------------------|
| AAD05576.1     | Cu/Zn superoxide dismutase [ <i>Raphanus sativus</i> ]          |
| XP_018453774.1 | superoxide dismutase [Fe] 1, [ <i>Raphanus sativus</i> ]        |
| ACT35470.1     | peroxidase 12, partial [ <i>Brassica rapa</i> ]                 |
| P00434.3       | Peroxidase P7; [PERP7_BRARR]                                    |
| XP_018483754.1 | peroxidase 47 [ <i>Raphanus sativus</i> ]                       |
| XP_018460650.1 | peroxidase 34 [ <i>Raphanus sativus</i> ]                       |
| XP_013606980.1 | peroxidase 54 [ <i>Brassica oleracea</i> var. <i>oleracea</i> ] |
| XP_018463254.1 | peroxidase 34-like [ <i>Raphanus sativus</i> ]                  |
| XP_013646868.1 | peroxidase 34-like isoform X1 [ <i>Brassica napus</i> ]         |
