# Supplementary material for: Dead Pericarps of Dry Fruits Function as Long-Term Storage for Active Hydrolytic Enzymes and Other Substances That Affect Germination and Microbial Growth
Source: Plants (Basel). 2017 Dec 19;6(4):64. doi: 10.3390/plants6040064 (PMC5750640; doi:10.3390/plants6040064)
Supplement: Supplementary file 1 [file plants-06-00064-s001.zip › Supplemental data 2.xlsx]

## Sheet: all proteins
Combined raw data for proteins released from indehiscent pericarps of S. alba upon hydration (replicates 1-3)
Accession	Description	Protein names	Organism	Interpro_IDs	Interpro_names	Gene ontology IDs	Gene ontology (molecular function)	Gene ontology (cellular component)	Gene ontology (biological process)	# AAs	No. peptides cutoff	MW [kDa]	calc. pI	ΣCoverage	Σ# Proteins	Σ# Unique Peptides	Σ# Peptides	Σ# PSMs	rep1 coverage	rep2 coverage	rep3 coverage	rep1 peptides	rep2 peptides	rep3 peptides	rep1	rep2	rep3	rep1 present 10%cov	rep2 present 10%cov	rep3 present 10%cov	Present 10% cov	rep1 present 20%cov	rep2 present 20%cov	rep3 present 20%cov	Present 20% Cov
A0A078K0K2	BnaCnng72870D protein (Fragment) OS=Brassica napus GN=BnaCnng72870D PE=4 SV=1 - [A0A078K0K2_BRANA]	BnaCnng72870D protein (Fragment)	Brassica napus (Rape)	IPR019956;IPR029071;IPR019954;IPR000626;	Ubiquitin; Ubiquitin-related domain; Ubiquitin conserved site; Ubiquitin domain					75	1	8.3815	7.25439	81.33	32	2	10	297	73.33	81.33	81.33	7	9	9	5.9469e+08	5.94094e+08	2.8438e+08	1	1	1	1	1	1	1	1
A0A078GKT6	BnaA08g07930D protein OS=Brassica napus GN=BnaA08g07930D PE=4 SV=1 - [A0A078GKT6_BRANA]	BnaA08g07930D protein (BnaC08g09170D protein)	Brassica napus (Rape)	IPR019956;IPR029071;IPR019954;IPR000626;	Ubiquitin; Ubiquitin-related domain; Ubiquitin conserved site; Ubiquitin domain					154	1	17.1742	5.69385	39.61	4	2	10	285	34.42	38.31	39.61	6	7	9	5.9469e+08	5.94094e+08	2.8069e+08	1	1	1	1	1	1	1	1
A0A078E2W5	Pectinesterase OS=Brassica napus GN=BnaC03g25220D PE=4 SV=1 - [A0A078E2W5_BRANA]	Pectinesterase (EC 3.1.1.11)	Brassica napus (Rape)	IPR006633;IPR012334;IPR011050;IPR033131;IPR000070;IPR006501;	Carbohydrate-binding/sugar hydrolysis domain; Pectin lyase fold; Pectin lyase fold/virulence factor; Pectinesterase, Asp active site; Pectinesterase, catalytic; Pectinesterase inhibitor domain	GO:0004857; GO:0005618; GO:0030599; GO:0042545; GO:0045330; GO:0045490	aspartyl esterase activity [GO:0045330]; enzyme inhibitor activity [GO:0004857]; pectinesterase activity [GO:0030599]	cell wall [GO:0005618]	cell wall modification [GO:0042545]; pectin catabolic process [GO:0045490]	445	2.225	48.5215	9.49561	31.69	8	7	11	122	28.99	31.69	27.42	9	11	8	3.69449e+08	5.52131e+08	1.54712e+08	1	1	1	1	1	1	1	1
A0A0D3CWX7	Uncharacterized protein OS=Brassica oleracea var. oleracea PE=4 SV=1 - [A0A0D3CWX7_BRAOL]	Uncharacterized protein	Brassica oleracea var. oleracea	IPR011065;IPR002160;	Kunitz inhibitor ST1-like; Proteinase inhibitor I3, Kunitz legume	GO:0004866	endopeptidase inhibitor activity [GO:0004866]			349	1.745	39.4445	4.77979	19.77	3	3	7	98	19.77	19.77	19.77	7	7	6	2.60795e+09	1.66877e+09	7.22976e+08	1	1	1	1
A0A0D3AEW4	Uncharacterized protein OS=Brassica oleracea var. oleracea PE=3 SV=1 - [A0A0D3AEW4_BRAOL]	Uncharacterized protein	Brassica oleracea var. oleracea	IPR018181;IPR029048;IPR029047;IPR013126;	Heat shock protein 70, conserved site; Heat shock protein 70kD, C-terminal domain; Heat shock protein 70kD, peptide-binding domain; Heat shock protein 70 family	GO:0002020; GO:0005524; GO:0005618; GO:0005774; GO:0005794; GO:0005886; GO:0009408; GO:0009506; GO:0009507; GO:0009615; GO:0016363; GO:0022626; GO:0046686; GO:0048046; GO:0080167	ATP binding [GO:0005524]; protease binding [GO:0002020]	apoplast [GO:0048046]; cell wall [GO:0005618]; chloroplast [GO:0009507]; cytosolic ribosome [GO:0022626]; Golgi apparatus [GO:0005794]; nuclear matrix [GO:0016363]; plasma membrane [GO:0005886]; plasmodesma [GO:0009506]; vacuolar membrane [GO:0005774]	response to cadmium ion [GO:0046686]; response to heat [GO:0009408]; response to karrikin [GO:0080167]; response to virus [GO:0009615]	636	3.18	69.3683	5.10986	19.97	56	1	13	74	18.71	17.14	18.55	12	10	12	1.91774e+08	1.67429e+08	2.02869e+08	1	1	1	1
M4F4A9	Uncharacterized protein OS=Brassica rapa subsp. pekinensis PE=3 SV=1 - [M4F4A9_BRARP]	Uncharacterized protein	Brassica rapa subsp. pekinensis (Chinese cabbage) (Brassica pekinensis)	IPR018181;IPR029048;IPR029047;IPR013126;	Heat shock protein 70, conserved site; Heat shock protein 70kD, C-terminal domain; Heat shock protein 70kD, peptide-binding domain; Heat shock protein 70 family	GO:0005524	ATP binding [GO:0005524]			572	2.86	62.7818	5.21143	20.28	21	1	11	71	20.28	20.1	20.28	11	10	11	1.5608e+08	1.67429e+08	8.93174e+07	1	1	1	1	1	1	1	1
A0A078IS30	BnaC01g38510D protein OS=Brassica napus GN=BnaC01g38510D PE=3 SV=1 - [A0A078IS30_BRANA]	BnaC01g38510D protein	Brassica napus (Rape)	IPR018181;IPR029048;IPR029047;IPR013126;	Heat shock protein 70, conserved site; Heat shock protein 70kD, C-terminal domain; Heat shock protein 70kD, peptide-binding domain; Heat shock protein 70 family	GO:0005524	ATP binding [GO:0005524]			647	3.235	71.026	5.24951	23.49	47	3	14	62	13.45	20.87	14.53	9	12	10	1.5608e+08	1.67429e+08	2.02869e+08	1	1	1	1	1	1	1	1
A0A078GMM3	Malate dehydrogenase OS=Brassica napus GN=BnaA05g14590D PE=3 SV=1 - [A0A078GMM3_BRANA]	Malate dehydrogenase (EC 1.1.1.37)	Brassica napus (Rape)	IPR001557;IPR022383;IPR001236;IPR015955;IPR001252;IPR010097;IPR016040;	L-lactate/malate dehydrogenase; Lactate/malate dehydrogenase, C-terminal; Lactate/malate dehydrogenase, N-terminal; Lactate dehydrogenase/glycoside hydrolase, family 4, C-terminal; Malate dehydrogenase, active site; Malate dehydrogenase, type 1; NAD(P)-binding domain	GO:0005975; GO:0006099; GO:0006108; GO:0030060	L-malate dehydrogenase activity [GO:0030060]		carbohydrate metabolic process [GO:0005975]; malate metabolic process [GO:0006108]; tricarboxylic acid cycle [GO:0006099]	341	1.705	35.7068	8.35303	38.71	16	7	10	59	21.11	38.71	29.91	7	10	8	1.19531e+08	1.1169e+08	6.66427e+07	1	1	1	1	1	1	1	1
A0A078EW34	BnaA02g32350D protein OS=Brassica napus GN=BnaA02g32350D PE=4 SV=1 - [A0A078EW34_BRANA]	BnaA02g32350D protein	Brassica napus (Rape)	IPR005519;IPR010028;IPR014403;IPR023214;	Acid phosphatase, class B-like; Acid phosphatase, plant; Vegetative storage protein/acid phosphatase; HAD-like domain	GO:0003993	acid phosphatase activity [GO:0003993]			268	1.34	30.5838	6.23975	16.79	1	1	6	53	16.42	16.79	16.79	4	6	5	8.08728e+07	7.04824e+08	9.64047e+07	1	1	1	1
Q7YNV2	Ribulose bisphosphate carboxylase large chain (Fragment) OS=Cakile maritima GN=rbcL PE=3 SV=1 - [Q7YNV2_CAKMA]	Ribulose bisphosphate carboxylase large chain (EC 4.1.1.39) (Fragment)	Cakile maritima (European searocket)	IPR033966;IPR020878;IPR000685;IPR017443;IPR020888;	RuBisCO; Ribulose bisphosphate carboxylase, large chain, active site; Ribulose bisphosphate carboxylase, large subunit, C-terminal; Ribulose bisphosphate carboxylase, large subunit, ferrodoxin-like N-terminal; Ribulose bisphosphate carboxylase large subunit, type I	GO:0000287; GO:0004497; GO:0009507; GO:0009853; GO:0016984; GO:0019253	magnesium ion binding [GO:0000287]; monooxygenase activity [GO:0004497]; ribulose-bisphosphate carboxylase activity [GO:0016984]	chloroplast [GO:0009507]	photorespiration [GO:0009853]; reductive pentose-phosphate cycle [GO:0019253]	449	2.245	49.4109	6.58057	22.49	117	2	11	53	20.71	19.6	14.48	10	10	6	2.75519e+08	1.24907e+08	4.46272e+07	1	1	1	1	1	1	1	1
A0A078F0M0	BnaC02g41060D protein OS=Brassica napus GN=BnaC02g41060D PE=4 SV=1 - [A0A078F0M0_BRANA]	BnaC02g41060D protein	Brassica napus (Rape)	IPR005519;IPR010028;IPR014403;IPR023214;	Acid phosphatase, class B-like; Acid phosphatase, plant; Vegetative storage protein/acid phosphatase; HAD-like domain	GO:0003993	acid phosphatase activity [GO:0003993]			268	1.34	30.588	6.93213	21.27	1	3	8	52	11.94	21.27	19.03	3	8	5	5.24418e+07	6.02158e+08	9.40728e+07	1	1	1	1	1	1	1	1
A0A078EB73	Pectinesterase OS=Brassica napus GN=BnaC05g39340D PE=4 SV=1 - [A0A078EB73_BRANA]	Pectinesterase (EC 3.1.1.11)	Brassica napus (Rape)	IPR012334;IPR011050;IPR033131;IPR000070;IPR006501;IPR018040;	Pectin lyase fold; Pectin lyase fold/virulence factor; Pectinesterase, Asp active site; Pectinesterase, catalytic; Pectinesterase inhibitor domain; Pectinesterase, Tyr active site	GO:0004857; GO:0005576; GO:0005618; GO:0030599; GO:0042545; GO:0045330; GO:0045490	aspartyl esterase activity [GO:0045330]; enzyme inhibitor activity [GO:0004857]; pectinesterase activity [GO:0030599]	cell wall [GO:0005618]; extracellular region [GO:0005576]	cell wall modification [GO:0042545]; pectin catabolic process [GO:0045490]	572	2.86	61.7055	8.96826	18.01	75	3	9	51	12.24	18.01	13.81	5	9	6	1.35825e+08	2.35185e+08	1.11941e+08	1	1	1	1
A0A1B1YY37	ATP synthase subunit alpha, chloroplastic OS=Cakile arabica GN=atpA PE=3 SV=1 - [A0A1B1YY37_9BRAS]	ATP synthase subunit alpha, chloroplastic (EC 3.6.3.14) (ATP synthase F1 sector subunit alpha) (F-ATPase subunit alpha)	Cakile arabica	IPR023366;IPR000793;IPR033732;IPR005294;IPR020003;IPR004100;IPR000194;IPR027417;	ATP synthase subunit alpha-like domain; ATP synthase, alpha subunit, C-terminal; ATP synthase, F1 complex, alpha subunit nucleotide-binding domain; ATP synthase, F1 complex, alpha subunit; ATPase, alpha/beta subunit, nucleotide-binding domain, active site; ATPase, F1/V1/A1 complex, alpha/beta subunit, N-terminal domain; ATPase, F1/V1/A1 complex, alpha/beta subunit, nucleotide-binding domain; P-lo…	GO:0005524; GO:0009535; GO:0015986; GO:0045261; GO:0046933	ATP binding [GO:0005524]; proton-transporting ATP synthase activity, rotational mechanism [GO:0046933]	chloroplast thylakoid membrane [GO:0009535]; proton-transporting ATP synthase complex, catalytic core F(1) [GO:0045261]	ATP synthesis coupled proton transport [GO:0015986]	507	2.535	55.28	5.13525	31.36	11	10	12	51	28.6	23.67	15.58	10	9	6	2.13549e+08	1.04998e+08	3.36488e+07	1	1	1	1	1	1	1	1
A0A078C056	Peroxidase OS=Brassica napus GN=BnaC01g25860D PE=3 SV=1 - [A0A078C056_BRANA]	Peroxidase (EC 1.11.1.7)	Brassica napus (Rape)	IPR010255;IPR002016;IPR000823;IPR019794;IPR019793;IPR033905;	Haem peroxidase; Haem peroxidase, plant/fungal/bacterial; Plant peroxidase; Peroxidase, active site; Peroxidases heam-ligand binding site; Secretory peroxidase	GO:0004601; GO:0005576; GO:0006979; GO:0020037; GO:0042744; GO:0046872	heme binding [GO:0020037]; metal ion binding [GO:0046872]; peroxidase activity [GO:0004601]	extracellular region [GO:0005576]	hydrogen peroxide catabolic process [GO:0042744]; response to oxidative stress [GO:0006979]	349	1.745	38.4033	7.62061	24.07	15	4	7	49	14.61	24.07	22.35	4	7	6	1.63133e+08	6.62479e+08	2.6557e+07	1	1	1	1	1	1	1	1
A0A1S5SJR9	Ribulose bisphosphate carboxylase large chain OS=Orychophragmus violaceus GN=rbcL PE=3 SV=1 - [A0A1S5SJR9_ORYVI]	Ribulose bisphosphate carboxylase large chain (RuBisCO large subunit) (EC 4.1.1.39)	Orychophragmus violaceus (Chinese violet cress) (Brassica violacea)	IPR033966;IPR020878;IPR000685;IPR017443;IPR020888;	RuBisCO; Ribulose bisphosphate carboxylase, large chain, active site; Ribulose bisphosphate carboxylase, large subunit, C-terminal; Ribulose bisphosphate carboxylase, large subunit, ferrodoxin-like N-terminal; Ribulose bisphosphate carboxylase large subunit, type I	GO:0000287; GO:0004497; GO:0009507; GO:0009853; GO:0016984; GO:0019253	magnesium ion binding [GO:0000287]; monooxygenase activity [GO:0004497]; ribulose-bisphosphate carboxylase activity [GO:0016984]	chloroplast [GO:0009507]	photorespiration [GO:0009853]; reductive pentose-phosphate cycle [GO:0019253]	479	2.395	52.9326	6.39209	20.67	107	1	10	48	19	17.95	13.15	9	9	5	8.19807e+07	5.79026e+07	1.92561e+07	1	1	1	1	1	1	1	1
A0A088BGG7	ATP synthase subunit alpha OS=Eruca sativa GN=atp1 PE=3 SV=1 - [A0A088BGG7_ERUSA]	ATP synthase subunit alpha	Eruca sativa (Garden rocket) (Eruca vesicaria subsp. sativa)	IPR023366;IPR000793;IPR033732;IPR005294;IPR020003;IPR004100;IPR000194;IPR027417;	ATP synthase subunit alpha-like domain; ATP synthase, alpha subunit, C-terminal; ATP synthase, F1 complex, alpha subunit nucleotide-binding domain; ATP synthase, F1 complex, alpha subunit; ATPase, alpha/beta subunit, nucleotide-binding domain, active site; ATPase, F1/V1/A1 complex, alpha/beta subunit, N-terminal domain; ATPase, F1/V1/A1 complex, alpha/beta subunit, nucleotide-binding domain; P-lo…	GO:0005524; GO:0005739; GO:0015986; GO:0045261; GO:0046933	ATP binding [GO:0005524]; proton-transporting ATP synthase activity, rotational mechanism [GO:0046933]	mitochondrion [GO:0005739]; proton-transporting ATP synthase complex, catalytic core F(1) [GO:0045261]	ATP synthesis coupled proton transport [GO:0015986]	507	2.535	55.0497	6.32861	23.47	22	8	10	43	11.24	21.5	10.45	5	9	5	8.87507e+07	1.18279e+08	2.46413e+07	1	1	1	1	1	1	1	1
M4EP06	Uncharacterized protein OS=Brassica rapa subsp. pekinensis PE=3 SV=1 - [M4EP06_BRARP]	Uncharacterized protein	Brassica rapa subsp. pekinensis (Chinese cabbage) (Brassica pekinensis)	IPR001461;IPR033121;IPR021109;IPR032799;IPR032861;IPR033868;	Aspartic peptidase A1 family; Peptidase family A1 domain; Aspartic peptidase domain; Xylanase inhibitor, C-terminal; Xylanase inhibitor, N-terminal; Xylanase inhibitor I-like	GO:0004190	aspartic-type endopeptidase activity [GO:0004190]			414	2.07	43.6652	8.26514	11.84	5	5	5	43	11.59	11.84	11.59	4	5	4	2.95628e+08	3.3601e+08	3.75379e+08	1	1	1	1
A0A068LAZ4	ATP synthase subunit beta, chloroplastic OS=Raphanus sativus GN=atpB PE=3 SV=1 - [A0A068LAZ4_RAPSA]	ATP synthase subunit beta, chloroplastic (EC 3.6.3.14) (ATP synthase F1 sector subunit beta) (F-ATPase subunit beta)	Raphanus sativus (Radish)	IPR003593;IPR005722;IPR020003;IPR004100;IPR000194;IPR024034;IPR027417;	AAA+ ATPase domain; ATP synthase, F1 complex, beta subunit; ATPase, alpha/beta subunit, nucleotide-binding domain, active site; ATPase, F1/V1/A1 complex, alpha/beta subunit, N-terminal domain; ATPase, F1/V1/A1 complex, alpha/beta subunit, nucleotide-binding domain; ATPase, F1/V1 complex, beta/alpha subunit, C-terminal; P-loop containing nucleoside triphosphate hydrolase	GO:0005524; GO:0009535; GO:0015986; GO:0045261; GO:0046933	ATP binding [GO:0005524]; proton-transporting ATP synthase activity, rotational mechanism [GO:0046933]	chloroplast thylakoid membrane [GO:0009535]; proton-transporting ATP synthase complex, catalytic core F(1) [GO:0045261]	ATP synthesis coupled proton transport [GO:0015986]	498	2.49	53.7662	5.88428	25.9	18	9	10	42	18.07	21.49	15.86	6	9	6	8.20141e+07	1.05055e+08	6.94726e+06	1	1	1	1	1	1	1	1
A0A0D3CAN6	Uncharacterized protein OS=Brassica oleracea var. oleracea PE=3 SV=1 - [A0A0D3CAN6_BRAOL]	Uncharacterized protein	Brassica oleracea var. oleracea	IPR018181;IPR029048;IPR029047;IPR013126;	Heat shock protein 70, conserved site; Heat shock protein 70kD, C-terminal domain; Heat shock protein 70kD, peptide-binding domain; Heat shock protein 70 family	GO:0005524	ATP binding [GO:0005524]			647	3.235	70.9573	5.59229	14.68	10	4	8	42	11.75	11.59	10.97	6	7	6	8.42483e+07	6.99827e+07	4.38684e+07	1	1	1	1
A0A078I5P1	ATP synthase subunit beta OS=Brassica napus GN=BnaC02g01030D PE=3 SV=1 - [A0A078I5P1_BRANA]	ATP synthase subunit beta (EC 3.6.3.14)	Brassica napus (Rape)	IPR003593;IPR005722;IPR020003;IPR004100;IPR000194;IPR024034;IPR027417;	AAA+ ATPase domain; ATP synthase, F1 complex, beta subunit; ATPase, alpha/beta subunit, nucleotide-binding domain, active site; ATPase, F1/V1/A1 complex, alpha/beta subunit, N-terminal domain; ATPase, F1/V1/A1 complex, alpha/beta subunit, nucleotide-binding domain; ATPase, F1/V1 complex, beta/alpha subunit, C-terminal; P-loop containing nucleoside triphosphate hydrolase	GO:0005524; GO:0015986; GO:0045261; GO:0046933	ATP binding [GO:0005524]; proton-transporting ATP synthase activity, rotational mechanism [GO:0046933]	proton-transporting ATP synthase complex, catalytic core F(1) [GO:0045261]	ATP synthesis coupled proton transport [GO:0015986]	449	2.245	48.5843	5.63037	32.74	22	9	10	41	22.72	20.49	22.94	7	7	7	9.02187e+07	7.55533e+07	6.48464e+06	1	1	1	1	1	1	1	1
A0A0D3BQ13	Pectinesterase OS=Brassica oleracea var. oleracea PE=4 SV=1 - [A0A0D3BQ13_BRAOL]	Pectinesterase (EC 3.1.1.11)	Brassica oleracea var. oleracea	IPR006633;IPR012334;IPR011050;IPR033131;IPR000070;IPR006501;	Carbohydrate-binding/sugar hydrolysis domain; Pectin lyase fold; Pectin lyase fold/virulence factor; Pectinesterase, Asp active site; Pectinesterase, catalytic; Pectinesterase inhibitor domain	GO:0004857; GO:0005618; GO:0030599; GO:0042545; GO:0045330; GO:0045490	aspartyl esterase activity [GO:0045330]; enzyme inhibitor activity [GO:0004857]; pectinesterase activity [GO:0030599]	cell wall [GO:0005618]	cell wall modification [GO:0042545]; pectin catabolic process [GO:0045490]	510	2.55	56.0783	9.43701	11.18	5	2	6	41	8.43	11.18	7.06	4	6	3	2.1271e+08	2.35561e+08	8.71597e+07	1	1	1	1
A0A078F449	Peroxidase OS=Brassica napus GN=BnaA06g16150D PE=3 SV=1 - [A0A078F449_BRANA]	Peroxidase (EC 1.11.1.7)	Brassica napus (Rape)	IPR010255;IPR002016;IPR000823;IPR019794;IPR019793;IPR033905;	Haem peroxidase; Haem peroxidase, plant/fungal/bacterial; Plant peroxidase; Peroxidase, active site; Peroxidases heam-ligand binding site; Secretory peroxidase	GO:0004601; GO:0005576; GO:0006979; GO:0020037; GO:0042744; GO:0046872	heme binding [GO:0020037]; metal ion binding [GO:0046872]; peroxidase activity [GO:0004601]	extracellular region [GO:0005576]	hydrogen peroxide catabolic process [GO:0042744]; response to oxidative stress [GO:0006979]	354	1.77	39.0188	6.53662	19.21	15	1	6	39	14.41	19.21	16.95	4	6	5	172995405	6.44914e+08	3.93722e+07	1	1	1	1
A0A078BU69	BnaA07g22750D protein OS=Brassica napus GN=BnaA07g22750D PE=4 SV=1 - [A0A078BU69_BRANA]	BnaA07g22750D protein	Brassica napus (Rape)	IPR011065;IPR002160;	Kunitz inhibitor ST1-like; Proteinase inhibitor I3, Kunitz legume	GO:0004866	endopeptidase inhibitor activity [GO:0004866]			202	1.01	22.5913	4.93213	22.28	1	0	5	39	22.28	22.28	16.83	5	5	3	9.59267e+08	9.48917e+08	6.11681e+08	1	1	1	1	1	1	1	1
A0A078G1A8	BnaC01g20120D protein OS=Brassica napus GN=BnaC01g20120D PE=4 SV=1 - [A0A078G1A8_BRANA]	BnaC01g20120D protein	Brassica napus (Rape)	IPR008972;IPR003245;	Cupredoxin; Phytocyanin domain	GO:0009055	electron carrier activity [GO:0009055]			332	1.66	33.224	7.81104	17.77	4	5	5	33	6.93	17.77	13.86	3	5	4	1.07677e+08	1.43226e+08	5.6649e+07	1	1	1	1
A0A078DU76	BnaC07g41630D protein OS=Brassica napus GN=BnaC07g41630D PE=4 SV=1 - [A0A078DU76_BRANA]	BnaC07g41630D protein	Brassica napus (Rape)	IPR000845;	Nucleoside phosphorylase domain	GO:0003824; GO:0009116	catalytic activity [GO:0003824]		nucleoside metabolic process [GO:0009116]	349	1.745	38.51	5.79541	10.6	1	2	2	32	10.6	10.6	10.6	2	2	2	1.12462e+08	2.8144e+08	4.07687e+07	1	1	1	1
A0A078HGR1	BnaC03g41600D protein OS=Brassica napus GN=BnaC03g41600D PE=4 SV=1 - [A0A078HGR1_BRANA]	BnaC03g41600D protein	Brassica napus (Rape)	IPR013813;IPR006056;IPR019897;IPR006175;	Endoribonuclease L-PSP/chorismate mutase-like; RidA family; RidA, conserved site; YjgF/YER057c/UK114 family					180	1	19.2752	8.79248	30.56	5	1	5	30	26.67	30.56	30.56	4	5	5	1.98037e+07	4.61944e+07	2.12739e+07	1	1	1	1	1	1	1	1
M4DYF3	Pectinesterase OS=Brassica rapa subsp. pekinensis PE=4 SV=1 - [M4DYF3_BRARP]	Pectinesterase (EC 3.1.1.11)	Brassica rapa subsp. pekinensis (Chinese cabbage) (Brassica pekinensis)	IPR012334;IPR011050;IPR033131;IPR000070;IPR006501;IPR018040;	Pectin lyase fold; Pectin lyase fold/virulence factor; Pectinesterase, Asp active site; Pectinesterase, catalytic; Pectinesterase inhibitor domain; Pectinesterase, Tyr active site	GO:0004857; GO:0005576; GO:0005618; GO:0030599; GO:0042545; GO:0045330; GO:0045490	aspartyl esterase activity [GO:0045330]; enzyme inhibitor activity [GO:0004857]; pectinesterase activity [GO:0030599]	cell wall [GO:0005618]; extracellular region [GO:0005576]	cell wall modification [GO:0042545]; pectin catabolic process [GO:0045490]	592	2.96	64.3601	9.27588	13.68	76	2	7	30	9.63	11.82	9.29	4	6	4	4.8245e+07	1.32297e+08	2.34365e+07	1	1	1	1
A0A0D2ZPJ1	Uncharacterized protein OS=Brassica oleracea var. oleracea PE=3 SV=1 - [A0A0D2ZPJ1_BRAOL]	Uncharacterized protein	Brassica oleracea var. oleracea	IPR018181;IPR029048;IPR029047;IPR013126;	Heat shock protein 70, conserved site; Heat shock protein 70kD, C-terminal domain; Heat shock protein 70kD, peptide-binding domain; Heat shock protein 70 family	GO:0005524	ATP binding [GO:0005524]			632	3.16	69.2981	5.18604	10.76	22	1	7	30	9.49	7.91	9.34	6	4	6	6.94252e+07	3.92231e+07	1.39447e+08	1	1	1	1
Q9XGS0	Thioredoxin M-type, chloroplastic OS=Brassica napus PE=1 SV=1 - [TRXM_BRANA]	Thioredoxin M-type, chloroplastic (Trx-M)	Brassica napus (Rape)	IPR005746;IPR012336;IPR017937;IPR013766;	Thioredoxin; Thioredoxin-like fold; Thioredoxin, conserved site; Thioredoxin domain	GO:0006662; GO:0009507; GO:0015035; GO:0045454	protein disulfide oxidoreductase activity [GO:0015035]	chloroplast [GO:0009507]	cell redox homeostasis [GO:0045454]; glycerol ether metabolic process [GO:0006662]	177	1	19.2569	9.31982	22.6	5	2	3	29	22.6	22.6	22.6	3	3	3	1.93832e+07	3.6568e+07	7.18602e+06	1	1	1	1	1	1	1	1
A0A0D3CL44	Uncharacterized protein OS=Brassica oleracea var. oleracea PE=4 SV=1 - [A0A0D3CL44_BRAOL]	Uncharacterized protein	Brassica oleracea var. oleracea	IPR000866;IPR024706;IPR019479;IPR012336;IPR013766;	Alkyl hydroperoxide reductase subunit C/ Thiol specific antioxidant; Peroxiredoxin, AhpC-type; Peroxiredoxin, C-terminal; Thioredoxin-like fold; Thioredoxin domain	GO:0005623; GO:0045454; GO:0051920	peroxiredoxin activity [GO:0051920]	cell [GO:0005623]	cell redox homeostasis [GO:0045454]	254	1.27	27.9193	5.69385	31.1	19	6	6	29	22.44	25.59	31.1	3	5	6	3.34491e+06	7.24742e+07	1.51903e+07	1	1	1	1	1	1	1	1
A0A078G9C9	BnaA10g22340D protein OS=Brassica napus GN=BnaC09g46850D PE=3 SV=1 - [A0A078G9C9_BRANA]	BnaA10g22340D protein (BnaC09g46850D protein)	Brassica napus (Rape)	IPR004000;IPR020902;IPR004001;	Actin family; Actin/actin-like conserved site; Actin, conserved site	GO:0005524	ATP binding [GO:0005524]			377	1.885	41.663	5.49072	20.69	82	6	6	28	16.45	10.34	14.59	5	3	4	3.85896e+08	2.07196e+08	1.48843e+08	1	1	1	1	1	1	1	1
A0A0D3A4H8	Uncharacterized protein OS=Brassica oleracea var. oleracea PE=4 SV=1 - [A0A0D3A4H8_BRAOL]	Uncharacterized protein	Brassica oleracea var. oleracea	IPR011583;IPR029070;IPR001223;IPR017853;	Chitinase II; Chitinase insertion domain; Glycoside hydrolase family 18, catalytic domain; Glycoside hydrolase superfamily	GO:0005975; GO:0008061	chitin binding [GO:0008061]		carbohydrate metabolic process [GO:0005975]	380	1.9	41.2254	8.74854	21.05	9	1	5	28	11.05	21.05	15.26	3	5	3	3.09862e+07	3.40104e+07	6.12722e+06	1	1	1	1	1	1	1	1
A0A078EZ74	Peroxidase OS=Brassica napus GN=BnaC08g20810D PE=3 SV=1 - [A0A078EZ74_BRANA]	Peroxidase (EC 1.11.1.7)	Brassica napus (Rape)	IPR010255;IPR002016;IPR000823;IPR019794;IPR019793;IPR033905;	Haem peroxidase; Haem peroxidase, plant/fungal/bacterial; Plant peroxidase; Peroxidase, active site; Peroxidases heam-ligand binding site; Secretory peroxidase	GO:0004601; GO:0005576; GO:0006979; GO:0020037; GO:0042744; GO:0046872	heme binding [GO:0020037]; metal ion binding [GO:0046872]; peroxidase activity [GO:0004601]	extracellular region [GO:0005576]	hydrogen peroxide catabolic process [GO:0042744]; response to oxidative stress [GO:0006979]	353	1.765	38.8436	6.15088	9.07	12	1	4	27	6.52	9.07	9.07	3	4	4	1.87916e+08	6.22247e+08	3.56643e+07
A0A078G8C9	BnaC08g43440D protein OS=Brassica napus GN=BnaC08g43440D PE=4 SV=1 - [A0A078G8C9_BRANA]	BnaC08g43440D protein (BnaC08g43450D protein)	Brassica napus (Rape)	IPR004161;IPR027417;IPR000795;IPR009000;IPR009001;IPR004539;IPR004160;	Translation elongation factor EFTu-like, domain 2; P-loop containing nucleoside triphosphate hydrolase; Transcription factor, GTP-binding domain; Translation protein, beta-barrel domain; Translation elongation factor EF1A/initiation factor IF2gamma, C-terminal; Translation elongation factor EF1A, eukaryotic/archaeal; Translation elongation factor EFTu/EF1A, C-terminal	GO:0003746; GO:0003924; GO:0005525; GO:0005737	GTPase activity [GO:0003924]; GTP binding [GO:0005525]; translation elongation factor activity [GO:0003746]	cytoplasm [GO:0005737]		427	2.135	46.7684	9.14404	20.37	29	7	7	27	6.79	20.37	4.45	3	7	2	8.17353e+08	3.38897e+08	8.44234e+06	1	1		1	1	1		1
M4DZI3	Uncharacterized protein OS=Brassica rapa subsp. pekinensis PE=4 SV=1 - [M4DZI3_BRARP]	Uncharacterized protein	Brassica rapa subsp. pekinensis (Chinese cabbage) (Brassica pekinensis)	IPR016169;IPR016166;IPR016167;IPR006094;	CO dehydrogenase flavoprotein-like, FAD-binding, subdomain 2; FAD-binding, type 2; FAD-binding, type 2, subdomain 1; FAD linked oxidase, N-terminal	GO:0016614; GO:0050660	flavin adenine dinucleotide binding [GO:0050660]; oxidoreductase activity, acting on CH-OH group of donors [GO:0016614]			502	2.51	55.9656	8.29443	15.34	17	7	7	27	13.94	15.14	5.58	6	6	2	4.88155e+07	4.2837e+07	1.03895e+07	1	1		1
A0A078EPB1	BnaC04g25490D protein OS=Brassica napus GN=BnaC04g25490D PE=3 SV=1 - [A0A078EPB1_BRANA]	BnaC04g25490D protein	Brassica napus (Rape)	IPR013785;IPR022896;IPR000652;IPR020861;	Aldolase-type TIM barrel; Triosephosphate isomerase, bacterial/eukaryotic; Triosephosphate isomerase; Triosephosphate isomerase, active site	GO:0004807; GO:0006096	triose-phosphate isomerase activity [GO:0004807]		glycolytic process [GO:0006096]	254	1.27	27.1411	5.98584	17.72	6	1	4	26	11.42	17.72	17.72	2	4	4	1.55174e+07	3.08657e+07	1.13817e+07	1	1	1	1
A0A078IX60	BnaA05g36080D protein OS=Brassica napus GN=BnaA05g36080D PE=4 SV=1 - [A0A078IX60_BRANA]	BnaA05g36080D protein	Brassica napus (Rape)	IPR013813;IPR006056;IPR019897;IPR006175;	Endoribonuclease L-PSP/chorismate mutase-like; RidA family; RidA, conserved site; YjgF/YER057c/UK114 family					188	1	19.8404	8.39697	31.38	6	1	5	26	17.55	31.38	21.28	3	5	4	1.78782e+07	4.24153e+07	1.48344e+07	1	1	1	1	1	1	1	1
A0A078J6D0	BnaC04g53030D protein OS=Brassica napus GN=BnaC04g53030D PE=4 SV=1 - [A0A078J6D0_BRANA]	BnaC04g53030D protein	Brassica napus (Rape)	IPR001002;IPR018371;IPR016283;IPR000726;IPR023346;	Chitin-binding, type 1; Chitin-binding, type 1, conserved site; Glycoside hydrolase, family 19; Glycoside hydrolase, family 19, catalytic; Lysozyme-like domain	GO:0004568; GO:0005975; GO:0006032; GO:0008061; GO:0016998	chitinase activity [GO:0004568]; chitin binding [GO:0008061]		carbohydrate metabolic process [GO:0005975]; cell wall macromolecule catabolic process [GO:0016998]; chitin catabolic process [GO:0006032]	255	1.275	27.5679	7.60596	12.16	2	2	4	26	12.16	12.16	12.16	4	3	4	1.23119e+08	1.7999e+08	1.01651e+07	1	1	1	1
Q84WW8	Calmodulin 1 (Fragment) OS=Brassica oleracea GN=cam1 PE=2 SV=1 - [Q84WW8_BRAOL]	Calmodulin 1 (Fragment)	Brassica oleracea (Wild cabbage)	IPR011992;IPR018247;IPR002048;IPR023198;	EF-hand domain pair; EF-Hand 1, calcium-binding site; EF-hand domain; Phosphoglycolate phosphatase, domain 2	GO:0005509	calcium ion binding [GO:0005509]			137	1	15.4763	4.36084	48.18	24	1	3	25	21.17	48.18	48.18	2	3	3	3.61587e+07	6.32208e+07	1.84257e+07	1	1	1	1	1	1	1	1
A0A078G6I2	Lactoylglutathione lyase OS=Brassica napus GN=BnaA08g25110D PE=3 SV=1 - [A0A078G6I2_BRANA]	Lactoylglutathione lyase (EC 4.4.1.5) (Glyoxalase I)	Brassica napus (Rape)	IPR029068;IPR004360;IPR004361;IPR018146;	Glyoxalase/Bleomycin resistance protein/Dihydroxybiphenyl dioxygenase; Glyoxalase/fosfomycin resistance/dioxygenase domain; Glyoxalase I; Glyoxalase I, conserved site	GO:0004462; GO:0046872	lactoylglutathione lyase activity [GO:0004462]; metal ion binding [GO:0046872]			283	1.415	31.8522	5.36377	15.55	7	1	4	25	12.72	15.55	12.72	3	4	3	2.20891e+07	8.31855e+07	2.00011e+07	1	1	1	1
M4E219	Uncharacterized protein OS=Brassica rapa subsp. pekinensis PE=3 SV=1 - [M4E219_BRARP]	Uncharacterized protein	Brassica rapa subsp. pekinensis (Chinese cabbage) (Brassica pekinensis)	IPR018181;IPR029048;IPR029047;IPR013126;	Heat shock protein 70, conserved site; Heat shock protein 70kD, C-terminal domain; Heat shock protein 70kD, peptide-binding domain; Heat shock protein 70 family	GO:0005524	ATP binding [GO:0005524]			669	3.345	73.6289	5.21143	10.76	15	3	7	25	5.98	7.32	2.54	4	5	2	8.43143e+07	7.09728e+07	5.06663e+07	1	1		1
A0A0D3BHU5	Malate dehydrogenase OS=Brassica oleracea var. oleracea PE=3 SV=1 - [A0A0D3BHU5_BRAOL]	Malate dehydrogenase (EC 1.1.1.37)	Brassica oleracea var. oleracea	IPR022383;IPR001236;IPR015955;IPR001252;IPR010097;IPR016040;	Lactate/malate dehydrogenase, C-terminal; Lactate/malate dehydrogenase, N-terminal; Lactate dehydrogenase/glycoside hydrolase, family 4, C-terminal; Malate dehydrogenase, active site; Malate dehydrogenase, type 1; NAD(P)-binding domain	GO:0005739; GO:0005774; GO:0005975; GO:0006099; GO:0006108; GO:0008746; GO:0009409; GO:0009570; GO:0009735; GO:0009793; GO:0009941; GO:0010319; GO:0030060; GO:0048046	L-malate dehydrogenase activity [GO:0030060]; NAD(P)+ transhydrogenase activity [GO:0008746]	apoplast [GO:0048046]; chloroplast envelope [GO:0009941]; chloroplast stroma [GO:0009570]; mitochondrion [GO:0005739]; stromule [GO:0010319]; vacuolar membrane [GO:0005774]	carbohydrate metabolic process [GO:0005975]; embryo development ending in seed dormancy [GO:0009793]; malate metabolic process [GO:0006108]; response to cold [GO:0009409]; response to cytokinin [GO:0009735]; tricarboxylic acid cycle [GO:0006099]	398	1.99	41.891	8.33838	9.05	8	1	4	25	6.03	9.05	9.05	3	4	4	3.57732e+07	4.8947e+07	1.85165e+07
A0A0D3BB98	Pectinesterase OS=Brassica oleracea var. oleracea PE=4 SV=1 - [A0A0D3BB98_BRAOL]	Pectinesterase (EC 3.1.1.11)	Brassica oleracea var. oleracea	IPR012334;IPR011050;IPR000070;IPR018040;	Pectin lyase fold; Pectin lyase fold/virulence factor; Pectinesterase, catalytic; Pectinesterase, Tyr active site	GO:0005576; GO:0005618; GO:0030599; GO:0042545; GO:0045330; GO:0045490	aspartyl esterase activity [GO:0045330]; pectinesterase activity [GO:0030599]	cell wall [GO:0005618]; extracellular region [GO:0005576]	cell wall modification [GO:0042545]; pectin catabolic process [GO:0045490]	391	1.955	42.5521	6.43018	19.18	6	3	7	25	3.07	19.18	12.02	1	7	4	60210890	1.37163e+08	2.72637e+07		1	1	1
A0A078DNQ6	BnaA03g25300D protein OS=Brassica napus GN=BnaA03g25300D PE=4 SV=1 - [A0A078DNQ6_BRANA]	BnaA03g25300D protein	Brassica napus (Rape)	IPR006843;	Plastid lipid-associated protein/fibrillin conserved domain					316	1.58	34.4211	6.82959	15.51	6	2	4	23	15.51	12.03	12.03	4	3	3	6.1708e+07	6.81311e+07	4.27621e+07	1	1	1	1
A0A078GAI4	Fructose-bisphosphate aldolase OS=Brassica napus GN=BnaA06g37230D PE=3 SV=1 - [A0A078GAI4_BRANA]	Fructose-bisphosphate aldolase (EC 4.1.2.13)	Brassica napus (Rape)	IPR029768;IPR013785;IPR000741;	Fructose-bisphosphate aldolase class-I active site; Aldolase-type TIM barrel; Fructose-bisphosphate aldolase, class-I	GO:0004332; GO:0006096	fructose-bisphosphate aldolase activity [GO:0004332]		glycolytic process [GO:0006096]	393	1.965	42.6089	7.79639	18.58	15	3	6	23	5.85	14.76	9.67	2	5	3	7.01258e+07	7.25099e+07	2.17557e+07	1	1	1	1
A0A0D3AQF1	Uncharacterized protein OS=Brassica oleracea var. oleracea PE=4 SV=1 - [A0A0D3AQF1_BRAOL]	Uncharacterized protein	Brassica oleracea var. oleracea	IPR011042;IPR018119;IPR004141;	Six-bladed beta-propeller, TolB-like; Strictosidine synthase, conserved region; Strictosidine synthase	GO:0009058; GO:0016844	strictosidine synthase activity [GO:0016844]		biosynthetic process [GO:0009058]	327	1.635	34.5077	5.52881	16.21	7	5	5	23	16.21	12.84	12.84	4	4	3	5.58557e+07	6.40954e+07	3.34767e+07	1	1	1	1
Q39366	Putative lactoylglutathione lyase OS=Brassica oleracea var. gemmifera PE=2 SV=1 - [LGUL_BRAOG]	Putative lactoylglutathione lyase (EC 4.4.1.5) (Aldoketomutase) (Glyoxalase I) (Glx I) (Ketone-aldehyde mutase) (Methylglyoxalase) (S-D-lactoylglutathione methylglyoxal lyase)	Brassica oleracea var. gemmifera (Brussel sprouts)	IPR029068;IPR004360;IPR004361;IPR018146;	Glyoxalase/Bleomycin resistance protein/Dihydroxybiphenyl dioxygenase; Glyoxalase/fosfomycin resistance/dioxygenase domain; Glyoxalase I; Glyoxalase I, conserved site	GO:0004462; GO:0046872	lactoylglutathione lyase activity [GO:0004462]; metal ion binding [GO:0046872]			282	1.41	31.6261	5.26221	13.83	3	1	4	22	10.99	13.83	10.99	3	4	3	4.84035e+07	1.27099e+08	3.78064e+07	1	1	1	1
Q38HW3	Protein disulfide-isomerase OS=Brassica carinata GN=PDI1 PE=3 SV=1 - [Q38HW3_BRACI]	Protein disulfide-isomerase (EC 5.3.4.1)	Brassica carinata (Ethiopian mustard) (Abyssinian cabbage)	IPR005788;IPR005792;IPR012336;IPR017937;IPR013766;	Disulphide isomerase; Protein disulphide isomerase; Thioredoxin-like fold; Thioredoxin, conserved site; Thioredoxin domain	GO:0003756; GO:0005783; GO:0045454	protein disulfide isomerase activity [GO:0003756]	endoplasmic reticulum [GO:0005783]	cell redox homeostasis [GO:0045454]	509	2.545	55.7062	5.12256	24.17	8	11	11	22	3.14	24.17	10.61	1	11	3	2.14087e+06	1.14574e+08	7.9857e+06		1	1	1		1	1	1
A0A078EQK7	BnaC04g25470D protein OS=Brassica napus GN=BnaC04g25470D PE=3 SV=1 - [A0A078EQK7_BRANA]	BnaC04g25470D protein	Brassica napus (Rape)	IPR013785;IPR022896;IPR000652;IPR020861;	Aldolase-type TIM barrel; Triosephosphate isomerase, bacterial/eukaryotic; Triosephosphate isomerase; Triosephosphate isomerase, active site	GO:0004807; GO:0006096	triose-phosphate isomerase activity [GO:0004807]		glycolytic process [GO:0006096]	253	1.265	27.001	5.98584	20.16	10	1	4	22	5.53	20.16	11.86	1	4	3	2.95131e+07	2.77504e+07	1.13817e+07		1	1	1		1	1	1
Q43391	Chitinase class IV (Fragment) OS=Brassica napus GN=LSC222 PE=4 SV=1 - [Q43391_BRANA]	Chitinase class IV (Fragment)	Brassica napus (Rape)	IPR001002;IPR018371;IPR016283;IPR000726;IPR023346;	Chitin-binding, type 1; Chitin-binding, type 1, conserved site; Glycoside hydrolase, family 19; Glycoside hydrolase, family 19, catalytic; Lysozyme-like domain	GO:0004568; GO:0005975; GO:0006032; GO:0008061; GO:0016998	chitinase activity [GO:0004568]; chitin binding [GO:0008061]		carbohydrate metabolic process [GO:0005975]; cell wall macromolecule catabolic process [GO:0016998]; chitin catabolic process [GO:0006032]	266	1.33	28.5063	5.2749	14.66	7	1	4	21	7.89	10.9	11.65	2	3	3	1.71838e+08	1.82085e+08	1.02955e+07	1	1	1	1
A0A078BSH1	BnaA07g15650D protein OS=Brassica napus GN=BnaA07g15650D PE=3 SV=1 - [A0A078BSH1_BRANA]	BnaA07g15650D protein	Brassica napus (Rape)	IPR018181;IPR029048;IPR029047;IPR013126;	Heat shock protein 70, conserved site; Heat shock protein 70kD, C-terminal domain; Heat shock protein 70kD, peptide-binding domain; Heat shock protein 70 family	GO:0005524	ATP binding [GO:0005524]			577	2.885	63.2335	4.91943	9.19	3	1	5	21	7.8	4.33	2.95	4	3	2	7.46939e+07	6.27473e+07	5.06663e+07
A0A078CE67	BnaC06g36860D protein OS=Brassica napus GN=BnaC06g36860D PE=4 SV=1 - [A0A078CE67_BRANA]	BnaC06g36860D protein	Brassica napus (Rape)	IPR001117;IPR011706;IPR011707;IPR008972;IPR034273;IPR034275;	Multicopper oxidase, type 1; Multicopper oxidase, type 2; Multicopper oxidase, type 3; Cupredoxin; Ascorbate oxidase homologue, first cupredoxin domain; Ascorbate oxidase homologue, third cupredoxin domain	GO:0005507; GO:0016491	copper ion binding [GO:0005507]; oxidoreductase activity [GO:0016491]			541	2.705	59.7652	8.39697	11.09	29	5	5	21	6.28	11.09	9.24	3	5	4	2.93264e+07	1.83983e+07	3.92604e+06	1	1	1	1
A0A078FVG4	BnaA08g04080D protein OS=Brassica napus GN=BnaA08g04080D PE=3 SV=1 - [A0A078FVG4_BRANA]	BnaA08g04080D protein	Brassica napus (Rape)	IPR000118;IPR025661;IPR000169;IPR025660;IPR013128;IPR000668;IPR013201;	Granulin; Cysteine peptidase, asparagine active site; Cysteine peptidase, cysteine active site; Cysteine peptidase, histidine active site; Peptidase C1A; Peptidase C1A, papain C-terminal; Cathepsin propeptide inhibitor domain (I29)	GO:0008234	cysteine-type peptidase activity [GO:0008234]			459	2.295	50.6252	5.40186	14.6	9	3	7	21	7.84	11.33	12.85	2	5	4	6.67236e+07	1.54877e+08	4.30196e+07		1	1	1
A0A0D3CS06	Uncharacterized protein OS=Brassica oleracea var. oleracea PE=4 SV=1 - [A0A0D3CS06_BRAOL]	Uncharacterized protein	Brassica oleracea var. oleracea	IPR032675;IPR001611;IPR003591;IPR013210;	Leucine-rich repeat domain, L domain-like; Leucine-rich repeat; Leucine-rich repeat, typical subtype; Leucine-rich repeat-containing N-terminal, plant-type					479	2.395	52.1175	9.34912	20.88	10	8	8	21	13.78	20.88	9.39	4	8	4	1.04885e+07	1.18924e+07	6.3005e+06	1	1	1	1	1	1	1	1
M4CVY8	Uncharacterized protein OS=Brassica rapa subsp. pekinensis PE=3 SV=1 - [M4CVY8_BRARP]	Uncharacterized protein	Brassica rapa subsp. pekinensis (Chinese cabbage) (Brassica pekinensis)	IPR031686;IPR023366;IPR020003;IPR004100;IPR000194;IPR024034;IPR005725;IPR027417;IPR022878;	ATPsynthase alpha/beta subunit, N-terminal extension; ATP synthase subunit alpha-like domain; ATPase, alpha/beta subunit, nucleotide-binding domain, active site; ATPase, F1/V1/A1 complex, alpha/beta subunit, N-terminal domain; ATPase, F1/V1/A1 complex, alpha/beta subunit, nucleotide-binding domain; ATPase, F1/V1 complex, beta/alpha subunit, C-terminal; ATPase, V1 complex, subunit A; P-loop contai…	GO:0005524; GO:0015991; GO:0033180; GO:0046034; GO:0046961	ATP binding [GO:0005524]; proton-transporting ATPase activity, rotational mechanism [GO:0046961]	proton-transporting V-type ATPase, V1 domain [GO:0033180]	ATP hydrolysis coupled proton transport [GO:0015991]; ATP metabolic process [GO:0046034]	588	2.94	64.4746	5.49072	8.5	7	4	4	21	8.5	6.8	6.8	4	3	3	5.47024e+07	7.78505e+07	1.0391e+07
M4FFE3	Peroxidase OS=Brassica rapa subsp. pekinensis PE=3 SV=1 - [M4FFE3_BRARP]	Peroxidase (EC 1.11.1.7)	Brassica rapa subsp. pekinensis (Chinese cabbage) (Brassica pekinensis)	IPR010255;IPR002016;IPR000823;IPR019794;IPR019793;IPR033905;	Haem peroxidase; Haem peroxidase, plant/fungal/bacterial; Plant peroxidase; Peroxidase, active site; Peroxidases heam-ligand binding site; Secretory peroxidase	GO:0004601; GO:0005576; GO:0005618; GO:0005773; GO:0006979; GO:0009735; GO:0016020; GO:0020037; GO:0042744; GO:0046872	heme binding [GO:0020037]; metal ion binding [GO:0046872]; peroxidase activity [GO:0004601]	cell wall [GO:0005618]; extracellular region [GO:0005576]; membrane [GO:0016020]; vacuole [GO:0005773]	hydrogen peroxide catabolic process [GO:0042744]; response to cytokinin [GO:0009735]; response to oxidative stress [GO:0006979]	354	1.77	38.9715	7.09326	13.56	22	1	5	20	7.06	6.5	11.3	3	3	4	1.58659e+08	6.12854e+08	1.90623e+07	1	1	1	1
K9LRW1	Glucanase 1 OS=Brassica rapa subsp. pekinensis GN=Glu1 PE=2 SV=1 - [K9LRW1_BRARP]	Glucanase 1	Brassica rapa subsp. pekinensis (Chinese cabbage) (Brassica pekinensis)	IPR000490;IPR017853;	Glycoside hydrolase family 17; Glycoside hydrolase superfamily	GO:0004553; GO:0005975	hydrolase activity, hydrolyzing O-glycosyl compounds [GO:0004553]		carbohydrate metabolic process [GO:0005975]	341	1.705	37.8573	9.24658	29.62	8	8	8	20	7.62	26.39	17.3	2	7	5	1.27373e+07	2.77076e+07	1.23414e+07	1	1	1	1	1	1	1	1
B1Q3A8	Cysteine protease (Fragment) OS=Brassica rapa var. perviridis GN=BrCP3 PE=3 SV=1 - [B1Q3A8_BRACM]	Cysteine protease (Fragment)	Brassica rapa var. perviridis	IPR000118;IPR025661;IPR000169;IPR025660;IPR013128;IPR000668;IPR013201;	Granulin; Cysteine peptidase, asparagine active site; Cysteine peptidase, cysteine active site; Cysteine peptidase, histidine active site; Peptidase C1A; Peptidase C1A, papain C-terminal; Cathepsin propeptide inhibitor domain (I29)	GO:0008234	cysteine-type peptidase activity [GO:0008234]			431	2.155	47.3724	4.95752	16.71	12	2	7	19	11.37	13.23	13.69	3	5	4	1.49703e+07	9.68372e+07	2.4477e+07	1	1	1	1
Q6ZZ92	Adenosine nucleotide translocator (Fragment) OS=Brassica oleracea var. viridis GN=ANT PE=2 SV=1 - [Q6ZZ92_BRAOV]	Adenosine nucleotide translocator (Fragment)	Brassica oleracea var. viridis (Flowering kale) (Brassica oleracea var. acephala)	IPR002113;IPR002067;IPR018108;IPR023395;	Adenine nucleotide translocator 1; Mitochondrial carrier protein; Mitochondrial substrate/solute carrier; Mitochondrial carrier domain	GO:0005215; GO:0005743; GO:0016021; GO:0055085	transporter activity [GO:0005215]	integral component of membrane [GO:0016021]; mitochondrial inner membrane [GO:0005743]	transmembrane transport [GO:0055085]	322	1.61	34.9992	9.70068	13.98	14	5	5	19	11.49	13.98	8.39	4	5	3	2.71044e+08	2.26751e+08	1.67903e+08	1	1	1	1
A0A078D1C0	BnaC01g13750D protein OS=Brassica napus GN=BnaC01g13750D PE=4 SV=1 - [A0A078D1C0_BRANA]	BnaC01g13750D protein	Brassica napus (Rape)	IPR006843;	Plastid lipid-associated protein/fibrillin conserved domain					317	1.585	34.564	4.89404	14.83	6	5	6	19	10.41	14.83	10.41	3	6	3	5.61884e+07	6.3709e+07	4.95393e+07	1	1	1	1
A0A078IH07	BnaA03g50940D protein OS=Brassica napus GN=BnaA03g50940D PE=4 SV=1 - [A0A078IH07_BRANA]	BnaA03g50940D protein	Brassica napus (Rape)	IPR007325;	Kynurenine formamidase	GO:0004061; GO:0019441	arylformamidase activity [GO:0004061]		tryptophan catabolic process to kynurenine [GO:0019441]	259	1.295	28.5297	6.53662	20.85	5	4	4	19	9.65	20.85	9.65	2	4	2	1.15048e+08	1.66701e+08	1.41305e+06	1	1	1	1	1	1	1	1
A0A0D3C580	Uncharacterized protein OS=Brassica oleracea var. oleracea PE=4 SV=1 - [A0A0D3C580_BRAOL]	Uncharacterized protein	Brassica oleracea var. oleracea	IPR003959;IPR027417;	ATPase, AAA-type, core; P-loop containing nucleoside triphosphate hydrolase	GO:0005524	ATP binding [GO:0005524]			439	2.195	48.0802	6.65381	16.86	14	1	7	19	16.86	11.62	12.53	6	5	5	5.49755e+07	5.85313e+07	1.60423e+07	1	1	1	1
A0A078EA11	Peroxidase OS=Brassica napus GN=BnaC09g48850D PE=3 SV=1 - [A0A078EA11_BRANA]	Peroxidase (EC 1.11.1.7)	Brassica napus (Rape)	IPR010255;IPR002016;IPR000823;IPR019794;IPR019793;IPR033905;	Haem peroxidase; Haem peroxidase, plant/fungal/bacterial; Plant peroxidase; Peroxidase, active site; Peroxidases heam-ligand binding site; Secretory peroxidase	GO:0004601; GO:0005576; GO:0006979; GO:0020037; GO:0042744; GO:0046872	heme binding [GO:0020037]; metal ion binding [GO:0046872]; peroxidase activity [GO:0004601]	extracellular region [GO:0005576]	hydrogen peroxide catabolic process [GO:0042744]; response to oxidative stress [GO:0006979]	358	1.79	37.2725	4.77979	12.01	20	3	4	18	7.54	9.5	5.87	2	3	2	1.65928e+08	1.79963e+08	1.06411e+07	1	1	1	1
A0A078C407	BnaC04g17750D protein OS=Brassica napus GN=BnaC04g17750D PE=3 SV=1 - [A0A078C407_BRANA]	BnaC04g17750D protein	Brassica napus (Rape)	IPR000118;IPR025661;IPR000169;IPR025660;IPR013128;IPR000668;IPR013201;	Granulin; Cysteine peptidase, asparagine active site; Cysteine peptidase, cysteine active site; Cysteine peptidase, histidine active site; Peptidase C1A; Peptidase C1A, papain C-terminal; Cathepsin propeptide inhibitor domain (I29)	GO:0008234	cysteine-type peptidase activity [GO:0008234]			460	2.3	50.5473	5.96045	15.43	11	4	5	18	8.04	15.43	6.52	3	5	2	8.05697e+07	1.53581e+08	3.61838e+07	1	1		1
A0A078CNJ8	BnaC08g32440D protein OS=Brassica napus GN=BnaC08g32440D PE=4 SV=1 - [A0A078CNJ8_BRANA]	BnaC08g32440D protein	Brassica napus (Rape)	IPR012347;	Ferritin-related					320	1.6	35.3938	6.25244	10.31	3	4	4	18	7.19	10.31	7.5	2	3	2	4.91992e+07	4.00156e+07	1.22364e+07	1	1	1	1
A0A078H3K2	BnaC01g36930D protein OS=Brassica napus GN=BnaC01g36930D PE=3 SV=1 - [A0A078H3K2_BRANA]	BnaC01g36930D protein	Brassica napus (Rape)	IPR013785;IPR012133;IPR000262;IPR008259;	Aldolase-type TIM barrel; Alpha-hydroxy acid dehydrogenase, FMN-dependent; FMN-dependent dehydrogenase; FMN-dependent alpha-hydroxy acid dehydrogenase, active site	GO:0010181; GO:0016491	FMN binding [GO:0010181]; oxidoreductase activity [GO:0016491]			357	1.785	39.2457	9.31982	15.97	18	1	5	18	15.97	12.89	10.08	5	4	3	7.05874e+07	3.31768e+07	2.29611e+07	1	1	1	1
A7XB47	Adenosylhomocysteinase OS=Brassica oleracea var. alboglabra PE=2 SV=1 - [A7XB47_BRAOA]	Adenosylhomocysteinase (EC 3.3.1.1)	Brassica oleracea var. alboglabra (Chinese kale) (Brassica alboglabra)	IPR034373;IPR000043;IPR015878;IPR016040;IPR020082;	Adenosylhomocysteinase; Adenosylhomocysteinase-like; S-adenosyl-L-homocysteine hydrolase, NAD binding domain; NAD(P)-binding domain; S-adenosyl-L-homocysteine hydrolase, conserved site	GO:0004013; GO:0006730; GO:0019510; GO:0051287	adenosylhomocysteinase activity [GO:0004013]; NAD binding [GO:0051287]		one-carbon metabolic process [GO:0006730]; S-adenosylhomocysteine catabolic process [GO:0019510]	466	2.33	51.0439	5.75732	9.01	23	4	4	17	6.87	6.87	4.72	3	3	2	5.84768e+07	5.50789e+07	2.70193e+07
A0A078EC07	Fructose-bisphosphate aldolase OS=Brassica napus GN=BnaC04g33570D PE=3 SV=1 - [A0A078EC07_BRANA]	Fructose-bisphosphate aldolase (EC 4.1.2.13)	Brassica napus (Rape)	IPR029768;IPR013785;IPR000741;	Fructose-bisphosphate aldolase class-I active site; Aldolase-type TIM barrel; Fructose-bisphosphate aldolase, class-I	GO:0004332; GO:0006096	fructose-bisphosphate aldolase activity [GO:0004332]		glycolytic process [GO:0006096]	390	1.95	42.1375	7.35693	11.28	9	1	4	17	5.9	11.28	5.9	2	4	2	6.32827e+07	6.02123e+07	3.39956e+07	1	1	1	1
A0A078FGE9	BnaA06g20230D protein OS=Brassica napus GN=BnaA06g20230D PE=4 SV=1 - [A0A078FGE9_BRANA]	BnaA06g20230D protein	Brassica napus (Rape)	IPR011992;IPR018247;IPR002048;IPR023198;	EF-hand domain pair; EF-Hand 1, calcium-binding site; EF-hand domain; Phosphoglycolate phosphatase, domain 2	GO:0005509	calcium ion binding [GO:0005509]			145	1	16.3927	4.36084	42.76	6	1	3	17	8.97	42.76	42.76	1	3	3	1.78987e+07	2.06157e+07	9.49548e+06		1	1	1		1	1	1
A0A078G9A1	BnaC09g00770D protein OS=Brassica napus GN=BnaC09g00770D PE=4 SV=1 - [A0A078G9A1_BRANA]	BnaC09g00770D protein	Brassica napus (Rape)	IPR005746;IPR012336;IPR017937;IPR013766;	Thioredoxin; Thioredoxin-like fold; Thioredoxin, conserved site; Thioredoxin domain	GO:0005623; GO:0006662; GO:0015035; GO:0045454	protein disulfide oxidoreductase activity [GO:0015035]	cell [GO:0005623]	cell redox homeostasis [GO:0045454]; glycerol ether metabolic process [GO:0006662]	183	1	19.8823	8.14795	22.4	4	1	4	17	13.66	22.4	20.22	2	4	3	2.52022e+07	1.36607e+07	6.15289e+06	1	1	1	1	1	1	1	1
A0A078GPG1	Alpha-galactosidase OS=Brassica napus GN=BnaA09g35760D PE=3 SV=1 - [A0A078GPG1_BRANA]	Alpha-galactosidase (EC 3.2.1.22) (Melibiase)	Brassica napus (Rape)	IPR013785;IPR002241;IPR000111;IPR017853;	Aldolase-type TIM barrel; Glycoside hydrolase, family 27; Glycoside hydrolase family 27/36, conserved site; Glycoside hydrolase superfamily	GO:0005975; GO:0052692	raffinose alpha-galactosidase activity [GO:0052692]		carbohydrate metabolic process [GO:0005975]	429	2.145	47.6204	5.16064	7.46	6	3	3	17	7.46	7.46	5.59	3	3	2	2.36264e+07	2.40921e+07	1.28658e+07
A0A0D3CBH7	Uncharacterized protein OS=Brassica oleracea var. oleracea PE=4 SV=1 - [A0A0D3CBH7_BRAOL]	Uncharacterized protein	Brassica oleracea var. oleracea	IPR001938;	Thaumatin					248	1.24	25.873	4.85596	8.47	11	2	2	17	8.47	8.47	8.47	2	2	2	8.33429e+07	1.62541e+08	1.28453e+08
A0A166EJQ3	Basic endochitinase CHB4-like protein (Fragment) OS=Raphanus sativus var. raphanistroides GN=CHI PE=4 SV=1 - [A0A166EJQ3_RAPSA]	Basic endochitinase CHB4-like protein (Fragment)	Raphanus sativus var. raphanistroides	IPR000726;IPR023346;	Glycoside hydrolase, family 19, catalytic; Lysozyme-like domain	GO:0004568; GO:0006032; GO:0016998	chitinase activity [GO:0004568]		cell wall macromolecule catabolic process [GO:0016998]; chitin catabolic process [GO:0006032]	121	1	13.3834	8.32373	25.62	4	1	3	17	17.36	17.36	25.62	2	2	3	139404178	1.18423e+08	1.02955e+07	1	1	1	1	1	1	1	1
M4DKM4	Uncharacterized protein OS=Brassica rapa subsp. pekinensis PE=4 SV=1 - [M4DKM4_BRARP]	Uncharacterized protein	Brassica rapa subsp. pekinensis (Chinese cabbage) (Brassica pekinensis)	IPR003959;IPR027417;	ATPase, AAA-type, core; P-loop containing nucleoside triphosphate hydrolase	GO:0005524	ATP binding [GO:0005524]			443	2.215	48.5115	7.72314	16.7	14	1	7	16	13.32	8.13	12.42	5	4	5	5.49755e+07	5.85313e+07	1.60423e+07	1	1	1	1
Q42399	Endo-polygalacturonidase OS=Brassica napus PE=2 SV=1 - [Q42399_BRANA]	Endo-polygalacturonidase (Polygalacturonase)	Brassica napus (Rape)	IPR000743;IPR006626;IPR012334;IPR011050;	Glycoside hydrolase, family 28; Parallel beta-helix repeat; Pectin lyase fold; Pectin lyase fold/virulence factor	GO:0004650; GO:0005576; GO:0005975; GO:0071555	polygalacturonase activity [GO:0004650]	extracellular region [GO:0005576]	carbohydrate metabolic process [GO:0005975]; cell wall organization [GO:0071555]	433	2.165	46.5662	7.75244	8.55	7	1	4	15	5.54	8.55	8.31	2	4	3	1.34615e+06	4.38974e+07	1.3761e+07
M4CSZ0	Uncharacterized protein OS=Brassica rapa subsp. pekinensis PE=3 SV=1 - [M4CSZ0_BRARP]	Uncharacterized protein	Brassica rapa subsp. pekinensis (Chinese cabbage) (Brassica pekinensis)	IPR000743;IPR006626;IPR012334;IPR011050;	Glycoside hydrolase, family 28; Parallel beta-helix repeat; Pectin lyase fold; Pectin lyase fold/virulence factor	GO:0004650; GO:0005576; GO:0005975; GO:0071555	polygalacturonase activity [GO:0004650]	extracellular region [GO:0005576]	carbohydrate metabolic process [GO:0005975]; cell wall organization [GO:0071555]	432	2.16	46.8691	7.44482	14.58	5	2	5	15	5.79	14.58	8.56	2	5	3	1.34615e+06	2.18694e+07	1.67189e+07		1	1	1
J7QBE3	Ribulose bisphosphate carboxylase large chain (Fragment) OS=Diplotaxis tenuifolia GN=rbcL PE=4 SV=1 - [J7QBE3_9BRAS]	Ribulose bisphosphate carboxylase large chain (Fragment)	Diplotaxis tenuifolia	IPR020878;IPR000685;IPR017443;	Ribulose bisphosphate carboxylase, large chain, active site; Ribulose bisphosphate carboxylase, large subunit, C-terminal; Ribulose bisphosphate carboxylase, large subunit, ferrodoxin-like N-terminal	GO:0000287; GO:0015977; GO:0016984	magnesium ion binding [GO:0000287]; ribulose-bisphosphate carboxylase activity [GO:0016984]		carbon fixation [GO:0015977]	193	1	21.5338	5.66846	21.76	39	1	4	15	17.62	15.03	6.22	3	3	1	7.08181e+07	3.08849e+07	3.45782e+06	1	1		1	1	1		1
A0A0D3CFB6	Photosystem II CP43 reaction center protein OS=Brassica oleracea var. oleracea PE=3 SV=1 - [A0A0D3CFB6_BRAOL]	Photosystem II CP43 reaction center protein	Brassica oleracea var. oleracea	IPR000484;IPR000932;IPR005869;	Photosynthetic reaction centre, L/M; Photosystem antenna protein-like; Photosystem II CP43 reaction centre protein	GO:0009523; GO:0009533; GO:0009535; GO:0009772; GO:0010287; GO:0016021; GO:0016168; GO:0018298; GO:0045156; GO:0046872	chlorophyll binding [GO:0016168]; electron transporter, transferring electrons within the cyclic electron transport pathway of photosynthesis activity [GO:0045156]; metal ion binding [GO:0046872]	chloroplast stromal thylakoid [GO:0009533]; chloroplast thylakoid membrane [GO:0009535]; integral component of membrane [GO:0016021]; photosystem II [GO:0009523]; plastoglobule [GO:0010287]	photosynthetic electron transport in photosystem II [GO:0009772]; protein-chromophore linkage [GO:0018298]	548	2.74	59.8685	6.0874	10.77	7	4	4	15	10.77	7.85	2.55	4	3	1	5.01716e+07	1.98204e+07	3.25258e+06	1	1		1
D7UNZ6	Glyceradehyde-3-phosphate dehydrogenase (Fragment) OS=Brassica rapa subsp. chinensis GN=BcGAPC PE=2 SV=1 - [D7UNZ6_BRARC]	Glyceradehyde-3-phosphate dehydrogenase (Fragment)	Brassica rapa subsp. chinensis (Pak-choi)	IPR020831;IPR020829;	Glyceraldehyde/Erythrose phosphate dehydrogenase family; Glyceraldehyde 3-phosphate dehydrogenase, catalytic domain	GO:0016620	oxidoreductase activity, acting on the aldehyde or oxo group of donors, NAD or NADP as acceptor [GO:0016620]			160	1	17.335	7.40088	50	56	6	6	14	30.63	34.38	15.63	3	4	2	1.41933e+07	39662260	1.57099e+07	1	1	1	1	1	1	1	1
A0A078CXF9	BnaC01g08070D protein OS=Brassica napus GN=BnaC09g08480D PE=3 SV=1 - [A0A078CXF9_BRANA]	BnaC01g08070D protein (BnaC09g08480D protein) (BnaC09g39400D protein)	Brassica napus (Rape)	IPR013785;IPR012133;IPR000262;IPR008259;	Aldolase-type TIM barrel; Alpha-hydroxy acid dehydrogenase, FMN-dependent; FMN-dependent dehydrogenase; FMN-dependent alpha-hydroxy acid dehydrogenase, active site	GO:0010181; GO:0016491	FMN binding [GO:0010181]; oxidoreductase activity [GO:0016491]			357	1.785	39.2807	9.18799	15.97	16	1	5	14	15.97	10.08	7.28	5	3	2	6.07058e+07	4.20106e+07	3.38538e+07	1	1	1	1
A0A078CSV9	BnaA09g34280D protein OS=Brassica napus GN=BnaA09g34280D PE=3 SV=1 - [A0A078CSV9_BRANA]	BnaA09g34280D protein	Brassica napus (Rape)	IPR001461;IPR033121;IPR021109;IPR032799;IPR032861;	Aspartic peptidase A1 family; Peptidase family A1 domain; Aspartic peptidase domain; Xylanase inhibitor, C-terminal; Xylanase inhibitor, N-terminal	GO:0004190	aspartic-type endopeptidase activity [GO:0004190]			430	2.15	46.0673	9.17334	10.23	4	3	4	14	5.81	8.14	10.23	2	3	4	3.0271e+07	1.26155e+07	1.14297e+07		1	1	1
A0A078D737	BnaC07g08100D protein OS=Brassica napus GN=BnaC07g08100D PE=4 SV=1 - [A0A078D737_BRANA]	BnaC07g08100D protein	Brassica napus (Rape)	IPR006843;	Plastid lipid-associated protein/fibrillin conserved domain					273	1.365	29.4845	9.11475	16.48	4	4	4	14	11.72	16.48	4.4	3	4	1	3.06356e+07	5.27935e+07	784125	1	1		1
A0A0D3CEZ5	Uncharacterized protein OS=Brassica oleracea var. oleracea PE=3 SV=1 - [A0A0D3CEZ5_BRAOL]	Uncharacterized protein	Brassica oleracea var. oleracea	IPR012951;IPR016169;IPR016166;IPR016167;IPR006094;	Berberine/berberine-like; CO dehydrogenase flavoprotein-like, FAD-binding, subdomain 2; FAD-binding, type 2; FAD-binding, type 2, subdomain 1; FAD linked oxidase, N-terminal	GO:0016614; GO:0050660	flavin adenine dinucleotide binding [GO:0050660]; oxidoreductase activity, acting on CH-OH group of donors [GO:0016614]			530	2.65	59.8857	9.48096	12.08	6	6	6	14	2.08	7.17	6.98	1	4	3	7.22911e+07	3.01738e+07	1.3963e+07		1	1	1
M4CXQ9	Uncharacterized protein OS=Brassica rapa subsp. pekinensis PE=3 SV=1 - [M4CXQ9_BRARP]	Uncharacterized protein	Brassica rapa subsp. pekinensis (Chinese cabbage) (Brassica pekinensis)	IPR001461;IPR033873;IPR033121;IPR021109;IPR032799;IPR032861;	Aspartic peptidase A1 family; CND41-like; Peptidase family A1 domain; Aspartic peptidase domain; Xylanase inhibitor, C-terminal; Xylanase inhibitor, N-terminal	GO:0004190	aspartic-type endopeptidase activity [GO:0004190]			1024	5.12	109.799	8.85107	3.42	4	2	2	14	1.17	3.42	3.42	1	2	2	7.41382e+07	5.45603e+07	2.89441e+07
M4EAJ6	Uncharacterized protein OS=Brassica rapa subsp. pekinensis PE=4 SV=1 - [M4EAJ6_BRARP]	Uncharacterized protein	Brassica rapa subsp. pekinensis (Chinese cabbage) (Brassica pekinensis)	IPR020003;IPR004100;IPR000194;IPR024034;IPR027417;IPR022879;	ATPase, alpha/beta subunit, nucleotide-binding domain, active site; ATPase, F1/V1/A1 complex, alpha/beta subunit, N-terminal domain; ATPase, F1/V1/A1 complex, alpha/beta subunit, nucleotide-binding domain; ATPase, F1/V1 complex, beta/alpha subunit, C-terminal; P-loop containing nucleoside triphosphate hydrolase; V-type ATP synthase regulatory subunit B/beta	GO:0005524; GO:0015992; GO:0046034	ATP binding [GO:0005524]		ATP metabolic process [GO:0046034]; proton transport [GO:0015992]	404	2.02	45.128	5.16064	16.09	13	5	5	14	6.19	16.09	10.15	2	5	3	1.25934e+07	1.04635e+07	2.4575e+06		1	1	1
M4DL52	Fructose-bisphosphate aldolase OS=Brassica rapa subsp. pekinensis PE=3 SV=1 - [M4DL52_BRARP]	Fructose-bisphosphate aldolase (EC 4.1.2.13)	Brassica rapa subsp. pekinensis (Chinese cabbage) (Brassica pekinensis)	IPR029768;IPR013785;IPR006569;IPR008942;IPR000741;IPR006903;IPR013087;	Fructose-bisphosphate aldolase class-I active site; Aldolase-type TIM barrel; CID domain; ENTH/VHS; Fructose-bisphosphate aldolase, class-I; RNA polymerase II-binding domain; Zinc finger C2H2-type	GO:0003676; GO:0004332; GO:0006096	fructose-bisphosphate aldolase activity [GO:0004332]; nucleic acid binding [GO:0003676]		glycolytic process [GO:0006096]	1323	6.615	144.181	7.50342	2.04	14	3	3	14	2.04	2.04	1.06	3	3	1	9.56904e+06	1.366e+07	8.45685e+06
A0A078H5M7	BnaA05g07770D protein OS=Brassica napus GN=BnaC04g08780D PE=3 SV=1 - [A0A078H5M7_BRANA]	BnaA05g07770D protein (BnaC04g08780D protein)	Brassica napus (Rape)	IPR000941;IPR034390;IPR020810;IPR029065;IPR020809;IPR020811;IPR029017;	Enolase; Enolase-like superfamily; Enolase, C-terminal TIM barrel domain; Enolase C-terminal domain-like; Enolase, conserved site; Enolase, N-terminal; Enolase N-terminal domain-like	GO:0000015; GO:0000287; GO:0004634; GO:0006096	magnesium ion binding [GO:0000287]; phosphopyruvate hydratase activity [GO:0004634]	phosphopyruvate hydratase complex [GO:0000015]	glycolytic process [GO:0006096]	429	2.145	46.0784	5.5415	12.12	15	4	4	13	8.39	12.12	5.83	3	4	2	1.49717e+07	2.50092e+07	2.78511e+06	1	1		1
A0A078DC67	BnaA03g13420D protein OS=Brassica napus GN=BnaA03g13420D PE=3 SV=1 - [A0A078DC67_BRANA]	BnaA03g13420D protein	Brassica napus (Rape)	IPR003593;IPR003959;IPR019489;IPR004176;IPR001270;IPR018368;IPR028299;IPR027417;IPR001943;	AAA+ ATPase domain; ATPase, AAA-type, core; Clp ATPase, C-terminal; Clp, N-terminal; ClpA/B family; ClpA/B, conserved site 1; ClpA/B, conserved site 2; P-loop containing nucleoside triphosphate hydrolase; UVR domain	GO:0005524; GO:0019538	ATP binding [GO:0005524]		protein metabolic process [GO:0019538]	827	4.135	92.0995	5.69385	8.34	13	6	6	13	7.13	2.9	2.9	5	2	2	2.23581e+07	1.57903e+07	4.56465e+06
A0A078F7A7	BnaC08g11440D protein OS=Brassica napus GN=BnaC08g11440D PE=3 SV=1 - [A0A078F7A7_BRANA]	BnaC08g11440D protein	Brassica napus (Rape)	IPR012725;IPR018181;IPR029048;IPR029047;IPR013126;	Chaperone DnaK; Heat shock protein 70, conserved site; Heat shock protein 70kD, C-terminal domain; Heat shock protein 70kD, peptide-binding domain; Heat shock protein 70 family	GO:0005524; GO:0006457; GO:0051082	ATP binding [GO:0005524]; unfolded protein binding [GO:0051082]		protein folding [GO:0006457]	621	3.105	66.7003	4.97021	9.66	15	2	5	13	6.76	5.8	3.54	3	3	2	1.70445e+07	5.25815e+07	1.11646e+07
A0A078FUJ1	BnaA09g20620D protein OS=Brassica napus GN=BnaA09g20620D PE=4 SV=1 - [A0A078FUJ1_BRANA]	BnaA09g20620D protein	Brassica napus (Rape)	IPR006843;	Plastid lipid-associated protein/fibrillin conserved domain					318	1.59	34.8232	5.46533	12.26	5	1	3	13	7.55	12.26	7.55	2	3	2	7.66338e+07	4.67501e+07	5.54053e+07	1	1	1	1
A0A078HAC5	Pectinesterase OS=Brassica napus GN=BnaC08g42010D PE=4 SV=1 - [A0A078HAC5_BRANA]	Pectinesterase (EC 3.1.1.11)	Brassica napus (Rape)	IPR012334;IPR011050;IPR033131;IPR000070;IPR006501;IPR018040;	Pectin lyase fold; Pectin lyase fold/virulence factor; Pectinesterase, Asp active site; Pectinesterase, catalytic; Pectinesterase inhibitor domain; Pectinesterase, Tyr active site	GO:0004857; GO:0005576; GO:0005618; GO:0030599; GO:0042545; GO:0045330; GO:0045490	aspartyl esterase activity [GO:0045330]; enzyme inhibitor activity [GO:0004857]; pectinesterase activity [GO:0030599]	cell wall [GO:0005618]; extracellular region [GO:0005576]	cell wall modification [GO:0042545]; pectin catabolic process [GO:0045490]	451	2.255	50.1265	8.89502	7.32	65	2	3	13	5.76	7.32	5.76	2	3	2	4.04506e+07	7.90578e+07	1.4883e+07
A0A078J4U4	BnaA01g34980D protein OS=Brassica napus GN=BnaA01g34980D PE=4 SV=1 - [A0A078J4U4_BRANA]	BnaA01g34980D protein	Brassica napus (Rape)	IPR011583;IPR029070;IPR001223;IPR017853;	Chitinase II; Chitinase insertion domain; Glycoside hydrolase family 18, catalytic domain; Glycoside hydrolase superfamily	GO:0005975; GO:0008061	chitin binding [GO:0008061]		carbohydrate metabolic process [GO:0005975]	380	1.9	41.1934	9.0415	22.89	6	1	5	13	5	22.89	9.21	2	5	2	4.14292e+07	3.33027e+07	5.71719e+06	1	1	1	1	1	1	1	1
A0A078CQS6	BnaA01g11190D protein OS=Brassica napus GN=BnaA01g11190D PE=4 SV=1 - [A0A078CQS6_BRANA]	BnaA01g11190D protein	Brassica napus (Rape)	IPR023222;IPR008797;	PsbQ-like domain; Oxygen-evolving enhancer protein 3	GO:0005509; GO:0009654; GO:0015979; GO:0019898	calcium ion binding [GO:0005509]	extrinsic component of membrane [GO:0019898]; photosystem II oxygen evolving complex [GO:0009654]	photosynthesis [GO:0015979]	227	1.135	24.3321	9.70068	16.3	3	3	3	12	16.3	16.3	6.17	3	3	1	6.62332e+06	1.36043e+07	1.11287e+06	1	1		1
A0A078CFG1	BnaA01g01420D protein OS=Brassica napus GN=BnaA01g01420D PE=4 SV=1 - [A0A078CFG1_BRANA]	BnaA01g01420D protein	Brassica napus (Rape)	IPR029058;IPR008758;	Alpha/Beta hydrolase fold; Peptidase S28	GO:0008236	serine-type peptidase activity [GO:0008236]			488	2.44	54.7182	7.1665	10.66	11	4	4	12	2.05	10.66	8.2	1	4	3	9.78735e+06	9.66427e+06	2.50608e+06		1	1	1
A0A078CWL9	BnaC03g03860D protein OS=Brassica napus GN=BnaC03g03860D PE=3 SV=1 - [A0A078CWL9_BRANA]	BnaC03g03860D protein	Brassica napus (Rape)	IPR012725;IPR018181;IPR029048;IPR029047;IPR013126;	Chaperone DnaK; Heat shock protein 70, conserved site; Heat shock protein 70kD, C-terminal domain; Heat shock protein 70kD, peptide-binding domain; Heat shock protein 70 family	GO:0005524; GO:0006457; GO:0051082	ATP binding [GO:0005524]; unfolded protein binding [GO:0051082]		protein folding [GO:0006457]	681	3.405	72.6946	5.69385	10.57	23	7	8	12	0	9.4	5.43		7	4	0	3.79168e+07	1.39308e+08		1	1	1
A0A078DT21	BnaA08g16310D protein OS=Brassica napus GN=BnaA08g16310D PE=4 SV=1 - [A0A078DT21_BRANA]	BnaA08g16310D protein	Brassica napus (Rape)	IPR001024;	PLAT/LH2 domain					178	1	19.7137	4.99561	12.36	2	2	2	12	5.62	12.36	12.36	1	2	2	212444574	1.28751e+08	5.43092e+07		1	1	1
A0A078HCN2	BnaA01g07970D protein OS=Brassica napus GN=BnaA01g07970D PE=4 SV=1 - [A0A078HCN2_BRANA]	BnaA01g07970D protein	Brassica napus (Rape)	IPR000845;	Nucleoside phosphorylase domain	GO:0003824; GO:0009116	catalytic activity [GO:0003824]		nucleoside metabolic process [GO:0009116]	347	1.735	38.3808	6.80029	13.54	9	2	2	12	13.54	4.03	4.03	2	1	1	1.46794e+08	5.90529e+08	1.31614e+08	1
A0A0D3EB90	GTP-binding nuclear protein OS=Brassica oleracea var. oleracea PE=3 SV=1 - [A0A0D3EB90_BRAOL]	GTP-binding nuclear protein	Brassica oleracea var. oleracea	IPR027417;IPR002041;IPR005225;IPR001806;	P-loop containing nucleoside triphosphate hydrolase; Ran GTPase; Small GTP-binding protein domain; Small GTPase superfamily	GO:0003924; GO:0005525; GO:0005634; GO:0006886; GO:0006913; GO:0007165	GTPase activity [GO:0003924]; GTP binding [GO:0005525]	nucleus [GO:0005634]	intracellular protein transport [GO:0006886]; nucleocytoplasmic transport [GO:0006913]; signal transduction [GO:0007165]	221	1.105	25.0936	6.85889	9.05	15	3	3	12	8.6	4.98	9.05	2	1	2	2.24713e+08	1.38559e+08	2.53568e+07
A0A0D3B7B3	Uncharacterized protein OS=Brassica oleracea var. oleracea PE=3 SV=1 - [A0A0D3B7B3_BRAOL]	Uncharacterized protein	Brassica oleracea var. oleracea	IPR018370;IPR001844;IPR002423;IPR027409;IPR027413;	Chaperonin Cpn60, conserved site; Chaperonin Cpn60; Chaperonin Cpn60/TCP-1 family; GroEL-like apical domain; GroEL-like equatorial domain	GO:0005524; GO:0005737; GO:0042026	ATP binding [GO:0005524]	cytoplasm [GO:0005737]	protein refolding [GO:0042026]	543	2.715	57.3076	4.89404	7.73	36	3	3	12	3.87	7.73	2.21	2	3	1	6.53768e+07	3.40132e+07	9901089
A0A0D3CBU1	Uncharacterized protein OS=Brassica oleracea var. oleracea PE=4 SV=1 - [A0A0D3CBU1_BRAOL]	Uncharacterized protein	Brassica oleracea var. oleracea	IPR018028;IPR020835;IPR024711;IPR011614;IPR002226;IPR010582;	Catalase, mono-functional, haem-containing; Catalase-like domain; Catalase, mono-functional, haem-containing, clades 1 and 3; Catalase core domain; Catalase haem-binding site; Catalase immune-responsive domain	GO:0004096; GO:0006979; GO:0020037; GO:0046872	catalase activity [GO:0004096]; heme binding [GO:0020037]; metal ion binding [GO:0046872]		response to oxidative stress [GO:0006979]	488	2.44	56.2694	7.81104	12.3	36	5	5	12	8.2	12.3	0	3	5		9.33861e+06	2.99434e+07	0	1	1		1
A0A078CBV1	BnaA04g08680D protein OS=Brassica napus GN=BnaA04g08680D PE=3 SV=1 - [A0A078CBV1_BRANA]	BnaA04g08680D protein	Brassica napus (Rape)	IPR000308;IPR023409;IPR023410;	14-3-3 protein; 14-3-3 protein, conserved site; 14-3-3 domain	GO:0019904	protein domain specific binding [GO:0019904]			257	1.285	28.8594	4.76709	12.45	50	1	3	11	7.78	7.78	9.34	2	2	2	3.45393e+08	6.21193e+06	5.94217e+06	1	1	1	1
A0A078CH00	BnaA04g04140D protein OS=Brassica napus GN=BnaA04g04140D PE=3 SV=1 - [A0A078CH00_BRANA]	BnaA04g04140D protein	Brassica napus (Rape)	IPR001461;IPR033121;IPR021109;IPR032799;IPR032861;	Aspartic peptidase A1 family; Peptidase family A1 domain; Aspartic peptidase domain; Xylanase inhibitor, C-terminal; Xylanase inhibitor, N-terminal	GO:0004190	aspartic-type endopeptidase activity [GO:0004190]			429	2.145	45.9393	9.01221	14.22	4	3	4	11	5.36	5.36	11.42	2	2	3	2.56882e+07	2.48102e+07	2.26952e+07			1
A0A078H6S5	BnaA01g13780D protein OS=Brassica napus GN=BnaA01g13780D PE=3 SV=1 - [A0A078H6S5_BRANA]	BnaA01g13780D protein	Brassica napus (Rape)	IPR012725;IPR018181;IPR029048;IPR029047;IPR013126;	Chaperone DnaK; Heat shock protein 70, conserved site; Heat shock protein 70kD, C-terminal domain; Heat shock protein 70kD, peptide-binding domain; Heat shock protein 70 family	GO:0005524; GO:0006457; GO:0051082	ATP binding [GO:0005524]; unfolded protein binding [GO:0051082]		protein folding [GO:0006457]	625	3.125	66.9704	4.91943	7.36	6	1	4	11	4.48	5.76	3.52	2	3	2	1.83799e+07	4.748e+07	1.11646e+07
A0A078IZ52	Peroxidase OS=Brassica napus GN=BnaC04g56590D PE=3 SV=1 - [A0A078IZ52_BRANA]	Peroxidase (EC 1.11.1.7)	Brassica napus (Rape)	IPR010255;IPR002016;IPR000823;IPR019794;IPR019793;IPR033905;	Haem peroxidase; Haem peroxidase, plant/fungal/bacterial; Plant peroxidase; Peroxidase, active site; Peroxidases heam-ligand binding site; Secretory peroxidase	GO:0004601; GO:0005576; GO:0006979; GO:0020037; GO:0042744; GO:0046872	heme binding [GO:0020037]; metal ion binding [GO:0046872]; peroxidase activity [GO:0004601]	extracellular region [GO:0005576]	hydrogen peroxide catabolic process [GO:0042744]; response to oxidative stress [GO:0006979]	350	1.75	38.9045	7.82568	11.14	20	1	3	11	4.86	8.29	4.86	2	2	2	2.01649e+08	1.64081e+09	1.85091e+07	1	1	1	1
A0A078J8I9	Nucleoside diphosphate kinase OS=Brassica napus GN=BnaC09g51980D PE=3 SV=1 - [A0A078J8I9_BRANA]	Nucleoside diphosphate kinase (EC 2.7.4.6)	Brassica napus (Rape)	IPR034907;IPR001564;IPR023005;	Nucleoside diphosphate kinase; Nucleoside diphosphate kinase, active site	GO:0004550; GO:0005524; GO:0006183; GO:0006228; GO:0006241	ATP binding [GO:0005524]; nucleoside diphosphate kinase activity [GO:0004550]		CTP biosynthetic process [GO:0006241]; GTP biosynthetic process [GO:0006183]; UTP biosynthetic process [GO:0006228]	140	1	15.462	6.30322	17.86	5	2	2	11	17.86	11.43	11.43	2	1	1	2.60391e+07	9.91499e+06	1.5567e+06	1
A0A078JY23	BnaCnng72220D protein OS=Brassica napus GN=BnaCnng72220D PE=3 SV=1 - [A0A078JY23_BRANA]	BnaCnng72220D protein	Brassica napus (Rape)	IPR000308;IPR023409;IPR023410;	14-3-3 protein; 14-3-3 protein, conserved site; 14-3-3 domain	GO:0019904	protein domain specific binding [GO:0019904]			257	1.285	28.8734	4.79248	12.45	45	1	3	11	7.78	7.78	4.67	2	2	1	3.45393e+08	23494970	3.82146e+06	1	1		1
A0A078H5R4	Histone H4 OS=Brassica napus GN=BnaC08g02310D PE=3 SV=1 - [A0A078H5R4_BRANA]	Histone H4	Brassica napus (Rape)	IPR035425;IPR009072;IPR001951;IPR019809;	Histone-fold; Histone H4; Histone H4, conserved site	GO:0000786; GO:0003677; GO:0005730; GO:0005774; GO:0005829; GO:0005886; GO:0006334; GO:0009414; GO:0009506; GO:0009507; GO:0009579; GO:0046982	DNA binding [GO:0003677]; protein heterodimerization activity [GO:0046982]	chloroplast [GO:0009507]; cytosol [GO:0005829]; nucleolus [GO:0005730]; nucleosome [GO:0000786]; plasma membrane [GO:0005886]; plasmodesma [GO:0009506]; thylakoid [GO:0009579]; vacuolar membrane [GO:0005774]	nucleosome assembly [GO:0006334]; response to water deprivation [GO:0009414]	103	1	11.4024	11.4731	22.33	8	3	3	10	21.36	22.33	11.65	2	3	1	4.42866e+07	1.62163e+07	7.55375e+06	1	1		1	1	1		1
D1L8R4	Photosystem II CP47 reaction center protein OS=Brassica napus GN=psbB PE=3 SV=1 - [D1L8R4_BRANA]	Photosystem II CP47 reaction center protein (PSII 47 kDa protein) (Protein CP-47)	Brassica napus (Rape)	IPR000932;IPR017486;	Photosystem antenna protein-like; Photosystem II CP47 reaction centre protein	GO:0009523; GO:0009535; GO:0009772; GO:0016021; GO:0016168; GO:0018298; GO:0045156	chlorophyll binding [GO:0016168]; electron transporter, transferring electrons within the cyclic electron transport pathway of photosynthesis activity [GO:0045156]	chloroplast thylakoid membrane [GO:0009535]; integral component of membrane [GO:0016021]; photosystem II [GO:0009523]	photosynthetic electron transport in photosystem II [GO:0009772]; protein-chromophore linkage [GO:0018298]	494	2.47	54.6757	6.80029	9.11	12	4	4	10	9.11	9.11	2.23	3	4	1	1.68186e+07	5.32171e+06	1.85343e+06
A0A078C7E7	BnaC08g28150D protein OS=Brassica napus GN=BnaC08g28150D PE=3 SV=1 - [A0A078C7E7_BRANA]	BnaC08g28150D protein	Brassica napus (Rape)	IPR000490;IPR017853;	Glycoside hydrolase family 17; Glycoside hydrolase superfamily	GO:0004553; GO:0005975	hydrolase activity, hydrolyzing O-glycosyl compounds [GO:0004553]		carbohydrate metabolic process [GO:0005975]	329	1.645	36.3101	4.86865	9.12	6	2	2	10	3.95	9.12	3.95	1	2	1	1.8954e+07	3.07005e+07	4.04872e+07
A0A078I0P1	Phosphoglycerate kinase OS=Brassica napus GN=BnaA01g30320D PE=3 SV=1 - [A0A078I0P1_BRANA]	Phosphoglycerate kinase (EC 2.7.2.3)	Brassica napus (Rape)	IPR001576;IPR015911;IPR015824;	Phosphoglycerate kinase; Phosphoglycerate kinase, conserved site; Phosphoglycerate kinase, N-terminal	GO:0004618; GO:0005524; GO:0006096	ATP binding [GO:0005524]; phosphoglycerate kinase activity [GO:0004618]		glycolytic process [GO:0006096]	480	2.4	50.1518	7.47412	9.58	10	2	3	10	7.29	9.58	3.54	2	3	1	2.0439e+07	1.51648e+07	1.70184e+07
A5YV74	Photosystem II D1 protein (Fragment) OS=Raphanus raphanistrum GN=psbA PE=4 SV=1 - [A5YV74_RAPRA]	Photosystem II D1 protein (Fragment)	Raphanus raphanistrum (Wild radish)	IPR000484;	Photosynthetic reaction centre, L/M	GO:0009507; GO:0009772; GO:0016021; GO:0045156	electron transporter, transferring electrons within the cyclic electron transport pathway of photosynthesis activity [GO:0045156]	chloroplast [GO:0009507]; integral component of membrane [GO:0016021]	photosynthetic electron transport in photosystem II [GO:0009772]	101	1	11.4856	5.26221	35.64	7	3	3	10	24.75	23.76	23.76	2	2	2	4.6653e+07	1.58754e+07	7.3532e+06	1	1	1	1	1	1	1	1
A0A078C440	BnaC08g31030D protein OS=Brassica napus GN=BnaC08g31030D PE=4 SV=1 - [A0A078C440_BRANA]	BnaC08g31030D protein	Brassica napus (Rape)	IPR000782;IPR033254;	FAS1 domain; Fasciclin-like arabinogalactan protein					422	2.11	43.4158	5.68115	12.8	4	2	4	9	0	12.8	10.9		4	3	0	1.01471e+07	4.75221e+06		1	1	1
A0A078GIF8	BnaC02g40260D protein OS=Brassica napus GN=BnaC02g40260D PE=4 SV=1 - [A0A078GIF8_BRANA]	BnaC02g40260D protein	Brassica napus (Rape)	IPR035647;IPR000640;IPR004161;IPR031157;IPR027417;IPR020568;IPR014721;IPR005225;IPR000795;IPR009000;IPR005517;	Translation elongation factor EFG, V domain; Translation elongation factor EFTu-like, domain 2; Tr-type G domain, conserved site; P-loop containing nucleoside triphosphate hydrolase; Ribosomal protein S5 domain 2-type fold; Ribosomal protein S5 domain 2-type fold, subgroup; Small GTP-binding protein domain; Transcription factor, GTP-binding domain; Translation protein, beta-barrel domain; Transla…	GO:0003924; GO:0005525	GTPase activity [GO:0003924]; GTP binding [GO:0005525]			838	4.19	93.6033	6.50732	5.85	23	4	4	9	1.19	4.65	2.74	1	3	2	64977376	2.73814e+07	1.46435e+07
A0A078JDZ2	BnaCnng41800D protein OS=Brassica napus GN=BnaCnng41800D PE=4 SV=1 - [A0A078JDZ2_BRANA]	BnaCnng41800D protein	Brassica napus (Rape)	IPR003137;IPR000209;IPR023828;IPR015500;IPR034197;IPR010259;	PA domain; Peptidase S8/S53 domain; Peptidase S8, subtilisin, Ser-active site; Peptidase S8, subtilisin-related; Cucumisin-like catalytic domain; Peptidase S8 propeptide/proteinase inhibitor I9	GO:0004252	serine-type endopeptidase activity [GO:0004252]			716	3.58	76.2192	6.97607	3.21	10	1	2	9	3.21	3.21	3.21	2	2	2	2.21696e+07	3.83587e+07	2.30014e+07
M4FBS5	Uncharacterized protein OS=Brassica rapa subsp. pekinensis PE=4 SV=1 - [M4FBS5_BRARP]	Uncharacterized protein	Brassica rapa subsp. pekinensis (Chinese cabbage) (Brassica pekinensis)	IPR001024;	PLAT/LH2 domain					181	1	19.9898	5.31299	17.13	3	1	3	9	17.13	10.5	12.15	3	2	2	4.36633e+07	0	1.89059e+07	1		1	1
M4D0N9	Uncharacterized protein OS=Brassica rapa subsp. pekinensis PE=4 SV=1 - [M4D0N9_BRARP]	Uncharacterized protein	Brassica rapa subsp. pekinensis (Chinese cabbage) (Brassica pekinensis)	IPR026891;IPR002772;IPR001764;IPR017853;IPR013783;	Fibronectin type III-like domain; Glycoside hydrolase family 3 C-terminal domain; Glycoside hydrolase, family 3, N-terminal; Glycoside hydrolase superfamily; Immunoglobulin-like fold	GO:0004553; GO:0005975	hydrolase activity, hydrolyzing O-glycosyl compounds [GO:0004553]		carbohydrate metabolic process [GO:0005975]	772	3.86	83.4247	8.90967	5.7	11	3	3	9	1.68	3.5	3.89	1	2	2	44973948	3.82447e+07	9.7712e+06
A0A0D3BKM1	Uncharacterized protein OS=Brassica oleracea var. oleracea PE=4 SV=1 - [A0A0D3BKM1_BRAOL]	Uncharacterized protein	Brassica oleracea var. oleracea	IPR004161;IPR033720;IPR009000;IPR009001;IPR004160;	Translation elongation factor EFTu-like, domain 2; Elongation factor Tu, domain 2; Translation protein, beta-barrel domain; Translation elongation factor EF1A/initiation factor IF2gamma, C-terminal; Translation elongation factor EFTu/EF1A, C-terminal	GO:0005525	GTP binding [GO:0005525]			206	1.03	22.5998	7.50342	18.93	17	3	3	9	13.11	18.93	7.77	2	3	1	30380342	4.88632e+06	1.79546e+06	1	1		1
A0A078EK83	BnaA08g00970D protein OS=Brassica napus GN=BnaA08g00970D PE=3 SV=1 - [A0A078EK83_BRANA]	BnaA08g00970D protein	Brassica napus (Rape)	IPR001087;IPR013830;IPR035669;	GDSL lipase/esterase; SGNH hydrolase-type esterase domain	GO:0016788	hydrolase activity, acting on ester bonds [GO:0016788]			371	1.855	41.1456	8.14795	5.66	2	2	2	8	2.43	5.66	5.66	1	2	2	4.10781e+07	4.74888e+07	1.43786e+07
A0A078GBV7	BnaA02g03840D protein OS=Brassica napus GN=BnaA06g02110D PE=3 SV=1 - [A0A078GBV7_BRANA]	BnaA02g03840D protein (BnaA06g02110D protein) (BnaA10g14870D protein) (BnaC09g37240D protein)	Brassica napus (Rape)	IPR006045;IPR001929;IPR019780;IPR014710;IPR011051;	Cupin 1; Germin; Germin, manganese binding site; RmlC-like jelly roll fold; RmlC-like cupin domain	GO:0005576; GO:0030145; GO:0045735	manganese ion binding [GO:0030145]; nutrient reservoir activity [GO:0045735]	extracellular region [GO:0005576]		211	1.055	21.8874	6.52197	15.17	6	2	2	8	10.9	15.17	15.17	1	2	2	6.75615e+06	6.26607e+08	2.86737e+08		1	1	1
A0A078DDS4	Phosphoglycerate kinase OS=Brassica napus GN=BnaA07g34980D PE=3 SV=1 - [A0A078DDS4_BRANA]	Phosphoglycerate kinase (EC 2.7.2.3)	Brassica napus (Rape)	IPR001576;IPR015824;	Phosphoglycerate kinase; Phosphoglycerate kinase, N-terminal	GO:0004618; GO:0005524; GO:0006096	ATP binding [GO:0005524]; phosphoglycerate kinase activity [GO:0004618]		glycolytic process [GO:0006096]	401	2.005	42.1054	5.99854	10.97	12	2	3	8	8.48	6.73	4.24	2	2	1	2.14328e+07	2.72141e+07	1.70184e+07
A0A078FEB8	BnaCnng03590D protein OS=Brassica napus GN=BnaCnng03590D PE=4 SV=1 - [A0A078FEB8_BRANA]	BnaCnng03590D protein	Brassica napus (Rape)	IPR016040;	NAD(P)-binding domain					253	1.265	27.1632	6.62451	11.46	5	2	4	8	0	11.46	11.46		4	3	0	6.30291e+07	1.01939e+07		1	1	1
A0A078FM80	BnaA08g13470D protein OS=Brassica napus GN=BnaA08g13470D PE=4 SV=1 - [A0A078FM80_BRANA]	BnaA08g13470D protein	Brassica napus (Rape)	IPR005519;IPR010028;IPR014403;IPR023214;	Acid phosphatase, class B-like; Acid phosphatase, plant; Vegetative storage protein/acid phosphatase; HAD-like domain	GO:0003993	acid phosphatase activity [GO:0003993]			263	1.315	29.4578	7.89893	15.21	4	3	3	8	11.41	15.21	7.6	2	3	1	5.19878e+06	4.4295e+07	3.36785e+06	1	1		1
A0A078JCI3	BnaA03g57160D protein OS=Brassica napus GN=BnaA03g57160D PE=4 SV=1 - [A0A078JCI3_BRANA]	BnaA03g57160D protein	Brassica napus (Rape)	IPR005746;IPR012336;IPR017937;IPR013766;	Thioredoxin; Thioredoxin-like fold; Thioredoxin, conserved site; Thioredoxin domain	GO:0005623; GO:0006662; GO:0015035; GO:0045454	protein disulfide oxidoreductase activity [GO:0015035]	cell [GO:0005623]	cell redox homeostasis [GO:0045454]; glycerol ether metabolic process [GO:0006662]	180	1	19.6581	9.15869	22.78	3	2	4	8	8.89	13.89	15.56	1	3	2	0	2.36953e+07	0		1				1
A0A078JF18	BnaA04g29010D protein OS=Brassica napus GN=BnaA04g29010D PE=4 SV=1 - [A0A078JF18_BRANA]	BnaA04g29010D protein	Brassica napus (Rape)	IPR016040;	NAD(P)-binding domain					324	1.62	34.8343	8.44092	12.04	8	2	4	8	3.7	12.04	2.47	1	4	1	9.91189e+06	6.67e+07	1.57713e+07		1
A0A078JGR9	BnaCnng52300D protein OS=Brassica napus GN=BnaCnng52300D PE=4 SV=1 - [A0A078JGR9_BRANA]	BnaCnng52300D protein	Brassica napus (Rape)	IPR001024;	PLAT/LH2 domain					182	1	20.1069	5.13525	26.92	3	2	4	8	17.03	15.38	12.09	3	2	2	4.81514e+07	0	1.89059e+07	1		1	1	1		1	1
K7N5L9	Peroxidase OS=Raphanus sativus PE=1 SV=1 - [K7N5L9_RAPSA]	Peroxidase (EC 1.11.1.7)	Raphanus sativus (Radish)	IPR010255;IPR002016;IPR000823;IPR019794;IPR019793;IPR033905;	Haem peroxidase; Haem peroxidase, plant/fungal/bacterial; Plant peroxidase; Peroxidase, active site; Peroxidases heam-ligand binding site; Secretory peroxidase	GO:0004601; GO:0005576; GO:0006979; GO:0020037; GO:0042744; GO:0046872	heme binding [GO:0020037]; metal ion binding [GO:0046872]; peroxidase activity [GO:0004601]	extracellular region [GO:0005576]	hydrogen peroxide catabolic process [GO:0042744]; response to oxidative stress [GO:0006979]	308	1.54	31.9256	5.89697	15.58	4	3	4	8	2.92	12.66	10.39	1	3	2	3.20028e+07	9.23537e+07	7.44369e+06		1	1	1
O24333	Glutamine synthetase OS=Raphanus sativus GN=gs1 alpha PE=2 SV=1 - [O24333_RAPSA]	Glutamine synthetase (EC 6.3.1.2)	Raphanus sativus (Radish)	IPR008147;IPR014746;IPR008146;IPR027303;IPR027302;	Glutamine synthetase, beta-Grasp domain; Glutamine synthetase/guanido kinase, catalytic domain; Glutamine synthetase, catalytic domain; Glutamine synthetase, glycine-rich site; Glutamine synthetase, N-terminal conserved site	GO:0004356; GO:0005524; GO:0006542	ATP binding [GO:0005524]; glutamate-ammonia ligase activity [GO:0004356]		glutamine biosynthetic process [GO:0006542]	354	1.77	38.4942	6.32861	11.3	23	2	3	8	3.95	11.3	3.95	1	3	1	4.15046e+07	4.4846e+07	9.42078e+06		1
O22374	Superoxide dismutase [Cu-Zn] OS=Raphanus sativus GN=SOD PE=2 SV=1 - [O22374_RAPSA]	Superoxide dismutase [Cu-Zn] (EC 1.15.1.1)	Raphanus sativus (Radish)	IPR018152;IPR001424;	Superoxide dismutase, copper/zinc, binding site; Superoxide dismutase, copper/zinc binding domain	GO:0004784; GO:0046872	metal ion binding [GO:0046872]; superoxide dismutase activity [GO:0004784]			152	1	15.0864	5.85889	25	9	2	2	8	6.58	25	25	1	2	2	1.85981e+07	1.7681e+07	5.83958e+06		1	1	1		1	1	1
M4DH11	Plastocyanin OS=Brassica rapa subsp. pekinensis PE=3 SV=1 - [M4DH11_BRARP]	Plastocyanin	Brassica rapa subsp. pekinensis (Chinese cabbage) (Brassica pekinensis)	IPR000923;IPR028871;IPR001235;IPR008972;IPR002387;	Blue (type 1) copper domain; Blue (type 1) copper protein, binding site; Blue (type 1) copper protein, plastocyanin-type; Cupredoxin; Plastocyanin	GO:0005507; GO:0009055; GO:0009535; GO:0055114	copper ion binding [GO:0005507]; electron carrier activity [GO:0009055]	chloroplast thylakoid membrane [GO:0009535]	oxidation-reduction process [GO:0055114]	116	1	11.9909	4.36084	24.14	2	2	2	8	0	24.14	24.14		2	2	0	2.36549e+07	1.587e+07		1	1	1		1	1	1
A0A0D3DT09	Uncharacterized protein OS=Brassica oleracea var. oleracea PE=4 SV=1 - [A0A0D3DT09_BRAOL]	Uncharacterized protein	Brassica oleracea var. oleracea	IPR016283;IPR000726;IPR023346;	Glycoside hydrolase, family 19; Glycoside hydrolase, family 19, catalytic; Lysozyme-like domain	GO:0004568; GO:0005975; GO:0006032; GO:0016998	chitinase activity [GO:0004568]		carbohydrate metabolic process [GO:0005975]; cell wall macromolecule catabolic process [GO:0016998]; chitin catabolic process [GO:0006032]	232	1.16	25.4192	4.97021	15.09	4	3	3	8	11.21	15.09	5.17	2	3	1	3.84868e+06	2.04155e+07	4.76272e+06	1	1		1
Q6PZE8	Uncharacterized protein (Fragment) OS=Brassica napus var. napus PE=2 SV=1 - [Q6PZE8_BRANA]	Uncharacterized protein (Fragment)	Brassica napus var. napus	IPR005788;IPR012336;IPR017937;IPR013766;	Disulphide isomerase; Thioredoxin-like fold; Thioredoxin, conserved site; Thioredoxin domain	GO:0005623; GO:0016853; GO:0045454	isomerase activity [GO:0016853]	cell [GO:0005623]	cell redox homeostasis [GO:0045454]	235	1.175	25.7543	6.88818	22.13	8	4	4	7	0	14.47	12.77		3	2	0	2.04401e+07	0		1				1
A0A078DKQ9	Malate dehydrogenase OS=Brassica napus GN=BnaA10g02560D PE=3 SV=1 - [A0A078DKQ9_BRANA]	Malate dehydrogenase (EC 1.1.1.37)	Brassica napus (Rape)	IPR001557;IPR022383;IPR001236;IPR015955;IPR001252;IPR011274;IPR010945;IPR016040;	L-lactate/malate dehydrogenase; Lactate/malate dehydrogenase, C-terminal; Lactate/malate dehydrogenase, N-terminal; Lactate dehydrogenase/glycoside hydrolase, family 4, C-terminal; Malate dehydrogenase, active site; Malate dehydrogenase, NAD-dependent, cytosolic; Malate dehydrogenase, type 2; NAD(P)-binding domain	GO:0005975; GO:0006099; GO:0006108; GO:0030060	L-malate dehydrogenase activity [GO:0030060]		carbohydrate metabolic process [GO:0005975]; malate metabolic process [GO:0006108]; tricarboxylic acid cycle [GO:0006099]	332	1.66	35.6954	6.55127	16.87	7	1	5	7	2.41	16.87	0	1	5		4.98188e+07	6.03953e+07	0		1
A0A078CF65	BnaA01g02650D protein OS=Brassica napus GN=BnaA01g02650D PE=3 SV=1 - [A0A078CF65_BRANA]	BnaA01g02650D protein	Brassica napus (Rape)	IPR000490;IPR017853;IPR012946;	Glycoside hydrolase family 17; Glycoside hydrolase superfamily; X8 domain	GO:0004553; GO:0005975	hydrolase activity, hydrolyzing O-glycosyl compounds [GO:0004553]		carbohydrate metabolic process [GO:0005975]	506	2.53	53.2106	6.04932	7.51	8	3	3	7	4.94	7.51	4.94	2	3	2	1.88412e+06	1826478	668409
A0A078CKR0	BnaC08g31950D protein OS=Brassica napus GN=BnaC08g31950D PE=3 SV=1 - [A0A078CKR0_BRANA]	BnaC08g31950D protein	Brassica napus (Rape)	IPR006045;IPR001929;IPR019780;IPR014710;IPR011051;	Cupin 1; Germin; Germin, manganese binding site; RmlC-like jelly roll fold; RmlC-like cupin domain	GO:0005576; GO:0030145; GO:0045735	manganese ion binding [GO:0030145]; nutrient reservoir activity [GO:0045735]	extracellular region [GO:0005576]		220	1.1	23.4303	8.93896	17.27	13	3	3	7	5.91	11.36	7.27	1	2	1	3.2746e+06	7.97685e+06	3.68565e+06		1
A0A078F3D8	BnaC01g30760D protein OS=Brassica napus GN=BnaC01g30760D PE=4 SV=1 - [A0A078F3D8_BRANA]	BnaC01g30760D protein	Brassica napus (Rape)							360	1.8	28.2921	10.5942	27.78	3	2	2	7	16.67	16.67	27.78	1	1	2	6.13252e+07	61526080	32395383			1				1
A0A078FRJ6	Malate dehydrogenase OS=Brassica napus GN=BnaA08g27880D PE=3 SV=1 - [A0A078FRJ6_BRANA]	Malate dehydrogenase (EC 1.1.1.37)	Brassica napus (Rape)	IPR001557;IPR022383;IPR001236;IPR015955;IPR001252;IPR011274;IPR010945;IPR016040;	L-lactate/malate dehydrogenase; Lactate/malate dehydrogenase, C-terminal; Lactate/malate dehydrogenase, N-terminal; Lactate dehydrogenase/glycoside hydrolase, family 4, C-terminal; Malate dehydrogenase, active site; Malate dehydrogenase, NAD-dependent, cytosolic; Malate dehydrogenase, type 2; NAD(P)-binding domain	GO:0005975; GO:0006099; GO:0006108; GO:0030060	L-malate dehydrogenase activity [GO:0030060]		carbohydrate metabolic process [GO:0005975]; malate metabolic process [GO:0006108]; tricarboxylic acid cycle [GO:0006099]	332	1.66	35.7654	6.55127	16.87	7	1	5	7	2.41	16.87	0	1	5		4.98188e+07	5.96655e+07	0		1
A0A078H5V1	BnaC01g37240D protein OS=Brassica napus GN=BnaC01g37240D PE=3 SV=1 - [A0A078H5V1_BRANA]	BnaC01g37240D protein	Brassica napus (Rape)	IPR003137;IPR009020;IPR000209;IPR023827;IPR023828;IPR015500;IPR034197;IPR010259;	PA domain; Protease propeptides/proteinase inhibitor I9; Peptidase S8/S53 domain; Peptidase S8, subtilisin, Asp-active site; Peptidase S8, subtilisin, Ser-active site; Peptidase S8, subtilisin-related; Cucumisin-like catalytic domain; Peptidase S8 propeptide/proteinase inhibitor I9	GO:0004252	serine-type endopeptidase activity [GO:0004252]			775	3.875	81.4457	6.49365	3.23	4	2	2	7	1.94	1.94	3.23	1	1	2	9.0471e+06	1.43796e+07	6.26381e+06
W8SJ11	Heat shock protein 90 (Fragment) OS=Brassica campestris GN=hsp90 PE=2 SV=1 - [W8SJ11_BRACM]	Heat shock protein 90 (Fragment)	Brassica campestris (Field mustard)	IPR001404;IPR020568;	Heat shock protein Hsp90 family; Ribosomal protein S5 domain 2-type fold	GO:0005524; GO:0006457; GO:0006950; GO:0051082	ATP binding [GO:0005524]; unfolded protein binding [GO:0051082]		protein folding [GO:0006457]; response to stress [GO:0006950]	421	2.105	48.1216	5.2876	4.28	27	2	2	7	2.38	4.28	2.38	1	2	1	2.35584e+08	6.42653e+07	85309006
A0A0D3AKA2	Uncharacterized protein OS=Brassica oleracea var. oleracea PE=4 SV=1 - [A0A0D3AKA2_BRAOL]	Uncharacterized protein	Brassica oleracea var. oleracea	IPR002772;IPR001764;IPR017853;	Glycoside hydrolase family 3 C-terminal domain; Glycoside hydrolase, family 3, N-terminal; Glycoside hydrolase superfamily	GO:0004553; GO:0005975	hydrolase activity, hydrolyzing O-glycosyl compounds [GO:0004553]		carbohydrate metabolic process [GO:0005975]	628	3.14	68.1175	9.42236	3.03	10	1	2	7	1.43	3.03	3.03	1	2	2	0	3.30944e+07	1.34524e+06
A0A191SEV2	Photosystem I P700 chlorophyll a apoprotein A2 OS=Brassica nigra GN=psaB PE=3 SV=1 - [A0A191SEV2_BRANI]	Photosystem I P700 chlorophyll a apoprotein A2 (EC 1.97.1.12) (PSI-B) (PsaB)	Brassica nigra (Black mustard) (Sinapis nigra)	IPR001280;IPR020586;IPR006244;	Photosystem I PsaA/PsaB; Photosystem I PsaA/PsaB, conserved site; Photosystem I PsaB	GO:0000287; GO:0009055; GO:0009522; GO:0009535; GO:0015979; GO:0016021; GO:0016168; GO:0016491; GO:0018298; GO:0051539	4 iron, 4 sulfur cluster binding [GO:0051539]; chlorophyll binding [GO:0016168]; electron carrier activity [GO:0009055]; magnesium ion binding [GO:0000287]; oxidoreductase activity [GO:0016491]	chloroplast thylakoid membrane [GO:0009535]; integral component of membrane [GO:0016021]; photosystem I [GO:0009522]	photosynthesis [GO:0015979]; protein-chromophore linkage [GO:0018298]	734	3.67	82.3609	7.40088	3.68	9	3	3	7	3.68	1.63	1.63	3	1	1	4.87992e+07	1.99754e+07	8.67426e+06
A0A0D2ZVN6	Uncharacterized protein OS=Brassica oleracea var. oleracea PE=4 SV=1 - [A0A0D2ZVN6_BRAOL]	Uncharacterized protein	Brassica oleracea var. oleracea	IPR003594;IPR019805;IPR001404;IPR020575;IPR020568;	Histidine kinase-like ATPase, C-terminal domain; Heat shock protein Hsp90, conserved site; Heat shock protein Hsp90 family; Heat shock protein Hsp90, N-terminal; Ribosomal protein S5 domain 2-type fold	GO:0005524; GO:0006457; GO:0006950; GO:0051082	ATP binding [GO:0005524]; unfolded protein binding [GO:0051082]		protein folding [GO:0006457]; response to stress [GO:0006950]	543	2.715	61.6256	7.48877	2.58	15	2	2	7	2.58	2.58	2.58	2	1	1	2.43164e+07	2.15286e+07	915342
C7E9R4	Peroxidase (Fragment) OS=Brassica campestris PE=2 SV=1 - [C7E9R4_BRACM]	Peroxidase (EC 1.11.1.7) (Fragment)	Brassica campestris (Field mustard)	IPR010255;IPR002016;IPR000823;IPR019794;IPR019793;IPR033905;	Haem peroxidase; Haem peroxidase, plant/fungal/bacterial; Plant peroxidase; Peroxidase, active site; Peroxidases heam-ligand binding site; Secretory peroxidase	GO:0004601; GO:0005576; GO:0006979; GO:0020037; GO:0042744; GO:0046872	heme binding [GO:0020037]; metal ion binding [GO:0046872]; peroxidase activity [GO:0004601]	extracellular region [GO:0005576]	hydrogen peroxide catabolic process [GO:0042744]; response to oxidative stress [GO:0006979]	323	1.615	35.3449	6.771	8.67	6	2	2	6	5.26	8.67	3.41	1	2	1	1.63973e+06	9.63417e+06	4.19657e+06
A0A078CQW5	BnaA07g20620D protein OS=Brassica napus GN=BnaC06g20480D PE=3 SV=1 - [A0A078CQW5_BRANA]	BnaA07g20620D protein (BnaC06g20480D protein)	Brassica napus (Rape)	IPR000308;IPR023409;IPR023410;	14-3-3 protein; 14-3-3 protein, conserved site; 14-3-3 domain	GO:0019904	protein domain specific binding [GO:0019904]			260	1.3	29.1805	4.75439	13.08	40	2	3	6	3.08	13.08	0	1	3		6.85908e+08	1.73371e+06	0		1
A0A078C7W5	BnaC06g36040D protein OS=Brassica napus GN=BnaC06g36040D PE=4 SV=1 - [A0A078C7W5_BRANA]	BnaC06g36040D protein	Brassica napus (Rape)	IPR016040;IPR008030;	NAD(P)-binding domain; NmrA-like domain					311	1.555	34.139	6.43018	14.15	14	4	4	6	3.86	14.15	0	1	4		7.94243e+06	2.17426e+07	0		1
A0A078CI95	BnaA05g04890D protein OS=Brassica napus GN=BnaA05g04890D PE=4 SV=1 - [A0A078CI95_BRANA]	BnaA05g04890D protein	Brassica napus (Rape)	IPR000782;IPR033254;	FAS1 domain; Fasciclin-like arabinogalactan protein					416	2.08	42.7844	5.36377	7.69	3	2	3	6	3.13	7.69	3.13	1	3	1	6.69885e+06	1.70438e+07	0
A0A078CW02	Histone H2B OS=Brassica napus GN=BnaC09g35280D PE=3 SV=1 - [A0A078CW02_BRANA]	Histone H2B	Brassica napus (Rape)	IPR009072;IPR007125;IPR000558;	Histone-fold; Histone H2A/H2B/H3; Histone H2B	GO:0000786; GO:0003677; GO:0005634; GO:0046982	DNA binding [GO:0003677]; protein heterodimerization activity [GO:0046982]	nucleosome [GO:0000786]; nucleus [GO:0005634]		150	1	16.3841	9.99365	28.67	33	4	4	6	22.67	16	5.33	3	2	1	3.96464e+06	3.06382e+07	3.69665e+06	1	1		1	1	1		1
A0A078DQH7	BnaA03g23840D protein OS=Brassica napus GN=BnaA03g23840D PE=3 SV=1 - [A0A078DQH7_BRANA]	BnaA03g23840D protein	Brassica napus (Rape)	IPR002207;IPR010255;IPR002016;	Plant ascorbate peroxidase; Haem peroxidase; Haem peroxidase, plant/fungal/bacterial	GO:0004601; GO:0006979; GO:0020037	heme binding [GO:0020037]; peroxidase activity [GO:0004601]		response to oxidative stress [GO:0006979]	348	1.74	37.8195	8.19189	14.37	4	4	4	6	3.16	11.21	0	1	3		1.0772e+07	1.01568e+06	0		1
A0A078G1Y8	BnaA09g07420D protein OS=Brassica napus GN=BnaA09g07420D PE=4 SV=1 - [A0A078G1Y8_BRANA]	BnaA09g07420D protein	Brassica napus (Rape)	IPR003137;IPR000209;IPR023828;IPR015500;IPR034197;IPR010259;	PA domain; Peptidase S8/S53 domain; Peptidase S8, subtilisin, Ser-active site; Peptidase S8, subtilisin-related; Cucumisin-like catalytic domain; Peptidase S8 propeptide/proteinase inhibitor I9	GO:0004252	serine-type endopeptidase activity [GO:0004252]			717	3.585	75.9631	6.02393	3.21	12	1	2	6	1.26	3.21	3.21	1	2	2	2.27259e+07	2.95112e+07	1.8667e+07
A0A078GBI0	Beta-amylase OS=Brassica napus GN=BnaA08g05660D PE=3 SV=1 - [A0A078GBI0_BRANA]	Beta-amylase (EC 3.2.1.2)	Brassica napus (Rape)	IPR001554;IPR018238;IPR001371;IPR017853;	Glycoside hydrolase, family 14; Glycoside hydrolase, family 14, conserved site; Glycoside hydrolase, family 14B, plant; Glycoside hydrolase superfamily	GO:0000272; GO:0016161; GO:0102229	amylopectin maltohydrolase activity [GO:0102229]; beta-amylase activity [GO:0016161]		polysaccharide catabolic process [GO:0000272]	498	2.49	56.1839	5.35107	11.04	11	4	4	6	2.81	11.04	0	1	4		1.256e+06	2.44093e+07	0		1
A0A078GCQ3	BnaA04g05980D protein OS=Brassica napus GN=BnaA04g05980D PE=4 SV=1 - [A0A078GCQ3_BRANA]	BnaA04g05980D protein	Brassica napus (Rape)	IPR029062;IPR002818;IPR006287;	Class I glutamine amidotransferase-like; DJ-1/PfpI; Protein DJ-1					391	1.955	41.7977	5.24951	7.16	8	2	2	6	3.32	7.16	3.32	1	2	1	4.79506e+06	4.93226e+06	2.5672e+06
A0A078GNF2	Peptidyl-prolyl cis-trans isomerase OS=Brassica napus GN=BnaC09g09060D PE=3 SV=1 - [A0A078GNF2_BRANA]	Peptidyl-prolyl cis-trans isomerase (PPIase) (EC 5.2.1.8)	Brassica napus (Rape)	IPR029000;IPR024936;IPR020892;IPR002130;	Cyclophilin-like domain; Cyclophilin-type peptidyl-prolyl cis-trans isomerase; Cyclophilin-type peptidyl-prolyl cis-trans isomerase, conserved site; Cyclophilin-type peptidyl-prolyl cis-trans isomerase domain	GO:0003755; GO:0006457	peptidyl-prolyl cis-trans isomerase activity [GO:0003755]		protein folding [GO:0006457]	171	1	18.3991	8.14795	8.77	6	1	2	6	4.68	8.77	4.68	1	2	1	356046443	1.15878e+08	2.83233e+08
A0A078GT07	Pectinesterase OS=Brassica napus GN=BnaC03g66720D PE=4 SV=1 - [A0A078GT07_BRANA]	Pectinesterase (EC 3.1.1.11)	Brassica napus (Rape)	IPR012334;IPR011050;IPR033131;IPR000070;IPR006501;	Pectin lyase fold; Pectin lyase fold/virulence factor; Pectinesterase, Asp active site; Pectinesterase, catalytic; Pectinesterase inhibitor domain	GO:0004857; GO:0005618; GO:0030599; GO:0042545; GO:0045330; GO:0045490	aspartyl esterase activity [GO:0045330]; enzyme inhibitor activity [GO:0004857]; pectinesterase activity [GO:0030599]	cell wall [GO:0005618]	cell wall modification [GO:0042545]; pectin catabolic process [GO:0045490]	504	2.52	56.0342	8.42627	3.77	72	1	2	6	2.38	3.77	2.38	1	2	1	1.02699e+07	6.78927e+07	2.61505e+06
A0A078IGD9	BnaC05g13240D protein OS=Brassica napus GN=BnaC05g13240D PE=4 SV=1 - [A0A078IGD9_BRANA]	BnaC05g13240D protein	Brassica napus (Rape)	IPR006917;	SOUL haem-binding protein					231	1.155	25.5497	4.86865	12.12	2	2	2	6	5.19	12.12	5.19	1	2	1	1.30995e+08	1.21315e+08	171589396		1
A0A078J139	Peptidyl-prolyl cis-trans isomerase OS=Brassica napus GN=BnaC04g54560D PE=3 SV=1 - [A0A078J139_BRANA]	Peptidyl-prolyl cis-trans isomerase (PPIase) (EC 5.2.1.8)	Brassica napus (Rape)	IPR029000;IPR024936;IPR020892;IPR002130;	Cyclophilin-like domain; Cyclophilin-type peptidyl-prolyl cis-trans isomerase; Cyclophilin-type peptidyl-prolyl cis-trans isomerase, conserved site; Cyclophilin-type peptidyl-prolyl cis-trans isomerase domain	GO:0003755; GO:0006457	peptidyl-prolyl cis-trans isomerase activity [GO:0003755]		protein folding [GO:0006457]	201	1.005	21.7143	8.83643	7.46	12	1	2	6	3.98	3.98	7.46	1	1	2	356046443	2.19553e+08	1.49691e+08
A0A078JMZ9	Glutamine synthetase OS=Brassica napus GN=BnaCnng57900D PE=3 SV=1 - [A0A078JMZ9_BRANA]	Glutamine synthetase (EC 6.3.1.2)	Brassica napus (Rape)	IPR008147;IPR014746;IPR008146;IPR027303;IPR027302;	Glutamine synthetase, beta-Grasp domain; Glutamine synthetase/guanido kinase, catalytic domain; Glutamine synthetase, catalytic domain; Glutamine synthetase, glycine-rich site; Glutamine synthetase, N-terminal conserved site	GO:0004356; GO:0005524; GO:0006542	ATP binding [GO:0005524]; glutamate-ammonia ligase activity [GO:0004356]		glutamine biosynthetic process [GO:0006542]	354	1.77	38.5473	7.09326	6.78	20	1	2	6	3.95	6.78	3.95	1	2	1	5.35758e+06	2.13407e+07	1.73216e+07
A0A075C587	Caleosin-related family protein RD20 OS=Sinapis alba PE=2 SV=1 - [A0A075C587_SINAL]	Caleosin-related family protein RD20	Sinapis alba (White mustard) (Brassica hirta)	IPR007736;	Caleosin-related					196	1	22.07	5.35107	13.27	5	2	2	6	6.12	13.27	6.12	1	2	1	6.35042e+06	1.17042e+06	1.2587e+06		1
A0A0D3AFV4	Uncharacterized protein OS=Brassica oleracea var. oleracea PE=4 SV=1 - [A0A0D3AFV4_BRAOL]	Uncharacterized protein	Brassica oleracea var. oleracea	IPR029044;IPR002618;IPR016267;	Nucleotide-diphospho-sugar transferases; UDPGP family; UTP--glucose-1-phosphate uridylyltransferase	GO:0003983; GO:0006011	UTP:glucose-1-phosphate uridylyltransferase activity [GO:0003983]		UDP-glucose metabolic process [GO:0006011]	432	2.16	47.4869	6.07471	6.02	8	2	2	6	3.24	6.02	6.02	1	2	2	2.11389e+06	4.86271e+06	1.77931e+06
A0A0D3EDL1	Uncharacterized protein OS=Brassica oleracea var. oleracea PE=4 SV=1 - [A0A0D3EDL1_BRAOL]	Uncharacterized protein	Brassica oleracea var. oleracea	IPR001764;IPR017853;	Glycoside hydrolase, family 3, N-terminal; Glycoside hydrolase superfamily	GO:0004553; GO:0005975	hydrolase activity, hydrolyzing O-glycosyl compounds [GO:0004553]		carbohydrate metabolic process [GO:0005975]	327	1.635	35.4782	8.54346	5.81	8	1	2	6	5.81	5.81	2.75	2	2	1	0	3.3572e+07	0
A0A0D3ANI5	Ribulose bisphosphate carboxylase small chain OS=Brassica oleracea var. oleracea PE=3 SV=1 - [A0A0D3ANI5_BRAOL]	Ribulose bisphosphate carboxylase small chain (EC 4.1.1.39)	Brassica oleracea var. oleracea	IPR024681;IPR000894;	Ribulose bisphosphate carboxylase, small chain; Ribulose bisphosphate carboxylase small chain, domain	GO:0004497; GO:0009536; GO:0009853; GO:0015977; GO:0015979; GO:0016984	monooxygenase activity [GO:0004497]; ribulose-bisphosphate carboxylase activity [GO:0016984]	plastid [GO:0009536]	carbon fixation [GO:0015977]; photorespiration [GO:0009853]; photosynthesis [GO:0015979]	126	1	14.7864	6.53662	11.9	48	2	2	6	6.35	11.9	5.56	1	2	1	1.91561e+09	4.38866e+08	5.91207e+06		1
A0A0D3A7X4	Uncharacterized protein OS=Brassica oleracea var. oleracea PE=4 SV=1 - [A0A0D3A7X4_BRAOL]	Uncharacterized protein	Brassica oleracea var. oleracea	IPR016123;IPR002683;	Mog1/PsbP, alpha/beta/alpha sandwich; PsbP family	GO:0005509; GO:0009654; GO:0015979; GO:0019898	calcium ion binding [GO:0005509]	extrinsic component of membrane [GO:0019898]; photosystem II oxygen evolving complex [GO:0009654]	photosynthesis [GO:0015979]	207	1.035	23.7961	5.35107	12.08	7	2	2	6	0	12.08	4.83		2	1	0	2.58334e+07	0		1
M4DMR8	Uncharacterized protein OS=Brassica rapa subsp. pekinensis PE=4 SV=1 - [M4DMR8_BRARP]	Uncharacterized protein	Brassica rapa subsp. pekinensis (Chinese cabbage) (Brassica pekinensis)	IPR017946;IPR000909;	PLC-like phosphodiesterase, TIM beta/alpha-barrel domain; Phosphatidylinositol-specific phospholipase C, X domain	GO:0005886; GO:0006629; GO:0008081	phosphoric diester hydrolase activity [GO:0008081]	plasma membrane [GO:0005886]	lipid metabolic process [GO:0006629]	386	1.93	41.7172	6.84424	6.99	3	2	2	6	6.99	6.99	2.85	2	2	1	2.9251e+06	1.979e+06	3.14615e+06
E5KXU6	Superoxide dismutase (Fragment) OS=Brassica campestris GN=FSD1 PE=2 SV=1 - [E5KXU6_BRACM]	Superoxide dismutase (EC 1.15.1.1) (Fragment)	Brassica campestris (Field mustard)	IPR001189;IPR019833;IPR019832;IPR019831;	Manganese/iron superoxide dismutase; Manganese/iron superoxide dismutase, binding site; Manganese/iron superoxide dismutase, C-terminal; Manganese/iron superoxide dismutase, N-terminal	GO:0004784; GO:0046872	metal ion binding [GO:0046872]; superoxide dismutase activity [GO:0004784]			195	1	22.1511	6.20166	4.1	9	2	2	6		4.1	4.1		2	1	0	7.69432e+07	3.10896e+07
P09672	Glyceraldehyde-3-phosphate dehydrogenase A, chloroplastic (Fragment) OS=Sinapis alba GN=GAPA PE=2 SV=1 - [G3PA_SINAL]	Glyceraldehyde-3-phosphate dehydrogenase A, chloroplastic (EC 1.2.1.13) (NADP-dependent glyceraldehydephosphate dehydrogenase subunit A) (Fragment)	Sinapis alba (White mustard) (Brassica hirta)	IPR020831;IPR020830;IPR020829;IPR020828;IPR016040;	Glyceraldehyde/Erythrose phosphate dehydrogenase family; Glyceraldehyde 3-phosphate dehydrogenase, active site; Glyceraldehyde 3-phosphate dehydrogenase, catalytic domain; Glyceraldehyde 3-phosphate dehydrogenase, NAD(P) binding domain; NAD(P)-binding domain	GO:0009507; GO:0019253; GO:0047100	glyceraldehyde-3-phosphate dehydrogenase (NADP+) (phosphorylating) activity [GO:0047100]	chloroplast [GO:0009507]	reductive pentose-phosphate cycle [GO:0019253]	233	1.165	25.087	6.55127	13.73	17	3	3	5	5.58	4.72	8.15	1	1	2	860462	1.05852e+07	4.52651e+06			1
Q9AT46	Glucose-1-phosphate adenylyltransferase OS=Brassica rapa subsp. pekinensis GN=AGPS PE=2 SV=1 - [Q9AT46_BRARP]	Glucose-1-phosphate adenylyltransferase (EC 2.7.7.27) (ADP-glucose pyrophosphorylase)	Brassica rapa subsp. pekinensis (Chinese cabbage) (Brassica pekinensis)	IPR005836;IPR011831;IPR005835;IPR029044;IPR011004;	ADP-glucose pyrophosphorylase, conserved site; Glucose-1-phosphate adenylyltransferase; Nucleotidyl transferase domain; Nucleotide-diphospho-sugar transferases; Trimeric LpxA-like	GO:0005524; GO:0005978; GO:0008878; GO:0009507; GO:0019252	ATP binding [GO:0005524]; glucose-1-phosphate adenylyltransferase activity [GO:0008878]	chloroplast [GO:0009507]	glycogen biosynthetic process [GO:0005978]; starch biosynthetic process [GO:0019252]	519	2.595	57.0522	6.23975	5.01	8	2	2	5	0	5.01	5.01		2	2	0	5.65131e+06	7.4275e+06
A0A097PUM7	Glyceraldehyde-3-phosphate dehydrogenase (Fragment) OS=Brassica rapa subsp. chinensis GN=GAPDH-B PE=2 SV=1 - [A0A097PUM7_BRARC]	Glyceraldehyde-3-phosphate dehydrogenase (EC 1.2.1.-) (Fragment)	Brassica rapa subsp. chinensis (Pak-choi)	IPR003823;IPR020831;IPR020830;IPR020829;IPR020828;IPR006424;IPR016040;	Domain of unknown function CP12; Glyceraldehyde/Erythrose phosphate dehydrogenase family; Glyceraldehyde 3-phosphate dehydrogenase, active site; Glyceraldehyde 3-phosphate dehydrogenase, catalytic domain; Glyceraldehyde 3-phosphate dehydrogenase, NAD(P) binding domain; Glyceraldehyde-3-phosphate dehydrogenase, type I; NAD(P)-binding domain	GO:0006006; GO:0016620; GO:0050661; GO:0051287	NAD binding [GO:0051287]; NADP binding [GO:0050661]; oxidoreductase activity, acting on the aldehyde or oxo group of donors, NAD or NADP as acceptor [GO:0016620]		glucose metabolic process [GO:0006006]	367	1.835	39.0631	6.07471	8.17	4	3	3	5	3.27	5.99	5.45	1	2	2	0	7.15024e+06	5.00857e+06
A0A078CIE5	Chlorophyll a-b binding protein, chloroplastic OS=Brassica napus GN=BnaA05g05540D PE=3 SV=1 - [A0A078CIE5_BRANA]	Chlorophyll a-b binding protein, chloroplastic	Brassica napus (Rape)	IPR001344;IPR022796;IPR023329;	Chlorophyll A-B binding protein, plant; Chlorophyll A-B binding protein; Chlorophyll a/b binding protein domain	GO:0009522; GO:0009523; GO:0009535; GO:0009765; GO:0016021; GO:0016168; GO:0018298	chlorophyll binding [GO:0016168]	chloroplast thylakoid membrane [GO:0009535]; integral component of membrane [GO:0016021]; photosystem I [GO:0009522]; photosystem II [GO:0009523]	photosynthesis, light harvesting [GO:0009765]; protein-chromophore linkage [GO:0018298]	276	1.38	30.0826	5.36377	10.14	2	2	2	5	10.14	3.62	0	2	1		1.64833e+06	1.11084e+07	0	1
A0A078CEY6	BnaA05g04400D protein OS=Brassica napus GN=BnaA05g04400D PE=4 SV=1 - [A0A078CEY6_BRANA]	BnaA05g04400D protein	Brassica napus (Rape)	IPR001646;	Pentapeptide repeat					217	1.085	22.9836	6.55127	26.73	4	3	3	5	0	26.73	9.22		3	1	0	6.42957e+06	531221		1				1
A0A078D1J8	BnaC02g21910D protein OS=Brassica napus GN=BnaC02g21910D PE=4 SV=1 - [A0A078D1J8_BRANA]	BnaC02g21910D protein	Brassica napus (Rape)	IPR005124;	Vacuolar (H+)-ATPase G subunit	GO:0015992; GO:0016471; GO:0016820	hydrolase activity, acting on acid anhydrides, catalyzing transmembrane movement of substances [GO:0016820]	vacuolar proton-transporting V-type ATPase complex [GO:0016471]	proton transport [GO:0015992]	79	1	8.93254	6.30322	17.72	17	2	2	5	0	17.72	17.72		1	2	0	7.20799e+07	2.44353e+07			1
A0A078DKB8	BnaA04g01120D protein OS=Brassica napus GN=BnaA04g01120D PE=4 SV=1 - [A0A078DKB8_BRANA]	BnaA04g01120D protein	Brassica napus (Rape)	IPR029061;IPR009014;IPR005475;IPR005478;IPR020826;IPR033248;IPR033247;IPR005474;	Thiamin diphosphate-binding fold; Transketolase C-terminal/Pyruvate-ferredoxin oxidoreductase domain II; Transketolase-like, pyrimidine-binding domain; Transketolase, bacterial-like; Transketolase binding site; Transketolase, C-terminal domain; Transketolase family; Transketolase, N-terminal	GO:0004802; GO:0008152	transketolase activity [GO:0004802]		metabolic process [GO:0008152]	735	3.675	79.2792	6.43018	5.17	16	3	3	5	1.77	5.17	2.04	1	3	1	3387639	3.54177e+06	0
A0A078EBG5	Malate dehydrogenase OS=Brassica napus GN=BnaA06g08600D PE=3 SV=1 - [A0A078EBG5_BRANA]	Malate dehydrogenase (EC 1.1.1.37)	Brassica napus (Rape)	IPR022383;IPR001236;IPR015955;IPR001252;IPR010945;IPR016040;	Lactate/malate dehydrogenase, C-terminal; Lactate/malate dehydrogenase, N-terminal; Lactate dehydrogenase/glycoside hydrolase, family 4, C-terminal; Malate dehydrogenase, active site; Malate dehydrogenase, type 2; NAD(P)-binding domain	GO:0005975; GO:0006099; GO:0006108; GO:0030060	L-malate dehydrogenase activity [GO:0030060]		carbohydrate metabolic process [GO:0005975]; malate metabolic process [GO:0006108]; tricarboxylic acid cycle [GO:0006099]	219	1.095	23.3532	7.45947	20.55	6	1	4	5	0	20.55	0		4		0	2.78145e+07	0		1				1
A0A078I4Y5	BnaA02g04990D protein OS=Brassica napus GN=BnaA02g04990D PE=3 SV=1 - [A0A078I4Y5_BRANA]	BnaA02g04990D protein (BnaA07g04700D protein)	Brassica napus (Rape)	IPR006045;IPR001929;IPR014710;IPR011051;	Cupin 1; Germin; RmlC-like jelly roll fold; RmlC-like cupin domain	GO:0005576; GO:0030145; GO:0045735	manganese ion binding [GO:0030145]; nutrient reservoir activity [GO:0045735]	extracellular region [GO:0005576]		212	1.06	22.0735	8.01611	13.68	2	2	2	5	7.08	13.68	7.08	1	2	1	4.90537e+07	1.55545e+07	1.07992e+06		1
A0A078H3Z1	BnaA01g17570D protein OS=Brassica napus GN=BnaA01g17570D PE=3 SV=1 - [A0A078H3Z1_BRANA]	BnaA01g17570D protein	Brassica napus (Rape)	IPR025661;IPR000169;IPR013128;IPR000668;IPR013201;	Cysteine peptidase, asparagine active site; Cysteine peptidase, cysteine active site; Peptidase C1A; Peptidase C1A, papain C-terminal; Cathepsin propeptide inhibitor domain (I29)	GO:0008234	cysteine-type peptidase activity [GO:0008234]			368	1.84	40.7661	6.87354	9.78	3	2	2	5	0	9.78	9.78		2	2	0	4.43485e+06	1.56122e+06
A0A078HAI2	BnaC06g05100D protein OS=Brassica napus GN=BnaC06g05100D PE=3 SV=1 - [A0A078HAI2_BRANA]	BnaC06g05100D protein	Brassica napus (Rape)	IPR011249;IPR011765;IPR001431;IPR007863;	Metalloenzyme, LuxS/M16 peptidase-like; Peptidase M16, N-terminal; Peptidase M16, zinc-binding site; Peptidase M16, C-terminal	GO:0004222; GO:0046872	metal ion binding [GO:0046872]; metalloendopeptidase activity [GO:0004222]			502	2.51	53.9743	6.21436	4.78	11	2	2	5	2.99	4.78	2.99	1	2	1	1.33473e+07	1.06718e+07	5.53201e+06
A0A078IYS4	BnaC07g50800D protein OS=Brassica napus GN=BnaC07g50800D PE=4 SV=1 - [A0A078IYS4_BRANA]	BnaC07g50800D protein	Brassica napus (Rape)	IPR017849;IPR017850;IPR002591;	Alkaline phosphatase-like, alpha/beta/alpha; Alkaline-phosphatase-like, core domain; Type I phosphodiesterase/nucleotide pyrophosphatase/phosphate transferase	GO:0003824; GO:0008152; GO:0016021	catalytic activity [GO:0003824]	integral component of membrane [GO:0016021]	metabolic process [GO:0008152]	468	2.34	51.9943	5.49072	4.27	7	2	2	5	2.14	4.27	2.14	1	2	1	0	9.81203e+07	1.49301e+07
A0A078JUE7	BnaAnng36400D protein OS=Brassica napus GN=BnaAnng36400D PE=4 SV=1 - [A0A078JUE7_BRANA]	BnaAnng36400D protein	Brassica napus (Rape)	IPR032190;	Niemann-Pick C1, N-terminal	GO:0016021		integral component of membrane [GO:0016021]		344	1.72	37.2879	5.63037	8.14	4	2	2	5	8.14	8.14	3.78	2	2	1	3.12106e+06	8.14939e+06	2.57636e+06
A0A0D3A305	Uncharacterized protein OS=Brassica oleracea var. oleracea PE=3 SV=1 - [A0A0D3A305_BRAOL]	Uncharacterized protein	Brassica oleracea var. oleracea	IPR011356;IPR000819;IPR023042;IPR008283;	Peptidase M17, leucine aminopeptidase/peptidase B; Peptidase M17, leucyl aminopeptidase, C-terminal; Peptidase M17, leucine aminopeptidase; Peptidase M17, leucyl aminopeptidase, N-terminal	GO:0004177; GO:0005737; GO:0008235; GO:0030145	aminopeptidase activity [GO:0004177]; manganese ion binding [GO:0030145]; metalloexopeptidase activity [GO:0008235]	cytoplasm [GO:0005737]		581	2.905	60.9362	6.7417	4.13	10	2	2	5	2.07	4.13	4.13	1	2	2	1.52469e+07	9.67912e+06	3.84196e+06
M4ELI2	Uncharacterized protein OS=Brassica rapa subsp. pekinensis PE=4 SV=1 - [M4ELI2_BRARP]	Uncharacterized protein	Brassica rapa subsp. pekinensis (Chinese cabbage) (Brassica pekinensis)	IPR007493;	Protein of unknown function DUF538					160	1	17.835	4.56396	18.75	8	2	2	5	8.13	18.75		1	2		1.35481e+06	4.4009e+06	0		1
A0A0D3E0J8	Uncharacterized protein OS=Brassica oleracea var. oleracea PE=4 SV=1 - [A0A0D3E0J8_BRAOL]	Uncharacterized protein	Brassica oleracea var. oleracea	IPR000209;IPR023828;IPR015500;	Peptidase S8/S53 domain; Peptidase S8, subtilisin, Ser-active site; Peptidase S8, subtilisin-related	GO:0004252	serine-type endopeptidase activity [GO:0004252]			446	2.23	48.6965	5.45264	5.16	6	1	2	5	5.16	5.16	2.02	2	2	1	1.89048e+07	3.78269e+07	3.22576e+07
A0A078BSX3	BnaA07g18860D protein OS=Brassica napus GN=BnaA07g18860D PE=4 SV=1 - [A0A078BSX3_BRANA]	BnaA07g18860D protein	Brassica napus (Rape)	IPR000782;IPR033254;	FAS1 domain; Fasciclin-like arabinogalactan protein					413	2.065	43.5108	6.44287	4.6	5	1	2	5		4.6	4.6		2	2	0	3.45027e+07	1.78296e+07
A0A078C0V8	Alpha-mannosidase OS=Brassica napus GN=BnaC03g06150D PE=3 SV=1 - [A0A078C0V8_BRANA]	Alpha-mannosidase (EC 3.2.1.-)	Brassica napus (Rape)	IPR011013;IPR011330;IPR027291;IPR011682;IPR015341;IPR000602;IPR028995;	Galactose mutarotase-like domain; Glycoside hydrolase/deacetylase, beta/alpha-barrel; Glycoside hydrolase 38/57, N-terminal domain; Glycosyl hydrolase family 38, C-terminal; Glycoside hydrolase family 38, central domain; Glycoside hydrolase family 38, N-terminal domain; Glycoside hydrolase families 57/38, central domain	GO:0004559; GO:0006013; GO:0030246; GO:0046872	alpha-mannosidase activity [GO:0004559]; carbohydrate binding [GO:0030246]; metal ion binding [GO:0046872]		mannose metabolic process [GO:0006013]	1020	5.1	115.322	6.80029	2.25	4	2	2	4	1.08	2.25	0	1	2		429150	1.377e+07	0
A0A078C8J0	BnaC07g45310D protein OS=Brassica napus GN=BnaC07g45310D PE=4 SV=1 - [A0A078C8J0_BRANA]	BnaC07g45310D protein	Brassica napus (Rape)	IPR003137;IPR000209;IPR023828;IPR015500;IPR034197;IPR010259;	PA domain; Peptidase S8/S53 domain; Peptidase S8, subtilisin, Ser-active site; Peptidase S8, subtilisin-related; Cucumisin-like catalytic domain; Peptidase S8 propeptide/proteinase inhibitor I9	GO:0004252	serine-type endopeptidase activity [GO:0004252]			757	3.785	79.7128	9.18799	3.83	4	2	2	4	3.83	2.11	2.11	2	1	1	1.50355e+06	2.45605e+06	2085845
A0A078CAM5	BnaA03g32020D protein OS=Brassica napus GN=BnaA03g32020D PE=3 SV=1 - [A0A078CAM5_BRANA]	BnaA03g32020D protein (BnaC03g73560D protein)	Brassica napus (Rape)	IPR000235;IPR005716;IPR020606;IPR023798;	Ribosomal protein S5/S7; Ribosomal protein S5/S7, eukaryotic/archaeal; Ribosomal protein S7, conserved site; Ribosomal protein S7 domain	GO:0003723; GO:0003735; GO:0006412; GO:0015935	RNA binding [GO:0003723]; structural constituent of ribosome [GO:0003735]	small ribosomal subunit [GO:0015935]	translation [GO:0006412]	207	1.035	22.9462	9.62744	10.63	8	2	2	4	10.63	4.35	4.35	2	1	1	5.40402e+07	3.08091e+07	1.66101e+07	1
A0A078CPU4	BnaA01g09620D protein OS=Brassica napus GN=BnaA01g09620D PE=4 SV=1 - [A0A078CPU4_BRANA]	BnaA01g09620D protein	Brassica napus (Rape)	IPR027417;IPR005225;IPR001806;	P-loop containing nucleoside triphosphate hydrolase; Small GTP-binding protein domain; Small GTPase superfamily	GO:0003924; GO:0005525	GTPase activity [GO:0003924]; GTP binding [GO:0005525]			214	1.07	23.7789	5.35107	10.28	128	2	2	4	10.28		0	2			1.15261e+07	0	0	1
A0A078E4S0	BnaA07g26290D protein OS=Brassica napus GN=BnaA07g26290D PE=4 SV=1 - [A0A078E4S0_BRANA]	BnaA07g26290D protein	Brassica napus (Rape)	IPR029068;IPR004360;IPR004361;IPR018146;	Glyoxalase/Bleomycin resistance protein/Dihydroxybiphenyl dioxygenase; Glyoxalase/fosfomycin resistance/dioxygenase domain; Glyoxalase I; Glyoxalase I, conserved site	GO:0004462; GO:0046872	lactoylglutathione lyase activity [GO:0004462]; metal ion binding [GO:0046872]			341	1.705	37.8705	6.91748	8.8	3	2	2	4	4.11	8.8	4.11	1	2	1	7.38335e+06	3.56999e+07	2.69035e+07
A0A078F9V9	BnaC09g43670D protein OS=Brassica napus GN=BnaC09g43670D PE=3 SV=1 - [A0A078F9V9_BRANA]	BnaC09g43670D protein	Brassica napus (Rape)	IPR013785;IPR001585;IPR004732;IPR018225;	Aldolase-type TIM barrel; Transaldolase/Fructose-6-phosphate aldolase; Transaldolase type 2; Transaldolase, active site	GO:0004801; GO:0005737; GO:0005975; GO:0006098	sedoheptulose-7-phosphate:D-glyceraldehyde-3-phosphate glyceronetransferase activity [GO:0004801]	cytoplasm [GO:0005737]	carbohydrate metabolic process [GO:0005975]; pentose-phosphate shunt [GO:0006098]	439	2.195	47.8797	6.88818	7.06	10	2	2	4	0	7.06	4.1		2	1	0	4.35705e+06	605876
A0A078IGW6	Serine hydroxymethyltransferase OS=Brassica napus GN=BnaCnng17010D PE=3 SV=1 - [A0A078IGW6_BRANA]	Serine hydroxymethyltransferase (EC 2.1.2.1)	Brassica napus (Rape)	IPR015424;IPR015421;IPR015422;IPR001085;IPR019798;	Pyridoxal phosphate-dependent transferase; Pyridoxal phosphate-dependent transferase, major region, subdomain 1; Pyridoxal phosphate-dependent transferase, subdomain 2; Serine hydroxymethyltransferase; Serine hydroxymethyltransferase, pyridoxal phosphate binding site	GO:0004372; GO:0006545; GO:0030170; GO:0035999	glycine hydroxymethyltransferase activity [GO:0004372]; pyridoxal phosphate binding [GO:0030170]		glycine biosynthetic process [GO:0006545]; tetrahydrofolate interconversion [GO:0035999]	509	2.545	56.5149	8.48486	3.54	19	2	2	4	0	3.54	1.77		2	1	0	1.04118e+07	924008
A0A078IXL3	BnaC02g48660D protein OS=Brassica napus GN=BnaC02g48660D PE=4 SV=1 - [A0A078IXL3_BRANA]	BnaC02g48660D protein	Brassica napus (Rape)	IPR006946;IPR008979;	Domain of unknown function DUF642; Galactose-binding domain-like					339	1.695	36.8307	6.26514	5.01	18	2	2	4	0	2.36	5.01		1	2	0	64831138	46584504
A0A078JY17	BnaAnng41520D protein OS=Brassica napus GN=BnaAnng41520D PE=3 SV=1 - [A0A078JY17_BRANA]	BnaAnng41520D protein	Brassica napus (Rape)	IPR001461;IPR033121;IPR021109;IPR032799;IPR032861;	Aspartic peptidase A1 family; Peptidase family A1 domain; Aspartic peptidase domain; Xylanase inhibitor, C-terminal; Xylanase inhibitor, N-terminal	GO:0004190	aspartic-type endopeptidase activity [GO:0004190]			435	2.175	46.6406	6.75635	6.9	2	2	2	4	0	6.9	6.9		2	2	0	7333521	6.80597e+06
M4CPH3	Uncharacterized protein OS=Brassica rapa subsp. pekinensis PE=3 SV=1 - [M4CPH3_BRARP]	Uncharacterized protein	Brassica rapa subsp. pekinensis (Chinese cabbage) (Brassica pekinensis)	IPR031727;IPR011013;IPR000322;IPR030458;IPR030459;IPR025887;IPR017853;	Galactose mutarotase, N-terminal barrel; Galactose mutarotase-like domain; Glycoside hydrolase family 31; Glycosyl hydrolases family 31, active site; Glycosyl hydrolases family 31, conserved site; Glycoside hydrolase family 31, N-terminal domain; Glycoside hydrolase superfamily	GO:0004553; GO:0005773; GO:0005975; GO:0009505; GO:0030246; GO:0048046	carbohydrate binding [GO:0030246]; hydrolase activity, hydrolyzing O-glycosyl compounds [GO:0004553]	apoplast [GO:0048046]; plant-type cell wall [GO:0009505]; vacuole [GO:0005773]	carbohydrate metabolic process [GO:0005975]	891	4.455	99.4797	5.66846	2.36	4	2	2	4	1.23	1.12	2.36	1	1	2	0	13084378	1.04974e+07
P83504	Oxygen-evolving enhancer protein 1, chloroplastic (Fragment) OS=Brassica campestris GN=PSBO PE=1 SV=1 - [PSBO_BRACM]	Oxygen-evolving enhancer protein 1, chloroplastic (OEE1) (Fragment)	Brassica campestris (Field mustard)			GO:0009523; GO:0009535; GO:0015979		chloroplast thylakoid membrane [GO:0009535]; photosystem II [GO:0009523]	photosynthesis [GO:0015979]	31	1	3.41564	6.44287	32.26	15	2	2	3	0	29.03	32.26		1	1	0	1.03052e+07	0
B2KSD1	Trypsin inhibitor (Fragment) OS=Brassica oleracea var. botrytis PE=4 SV=1 - [B2KSD1_BRAOB]	Trypsin inhibitor (Fragment)	Brassica oleracea var. botrytis (Cauliflower)	IPR011065;IPR002160;	Kunitz inhibitor ST1-like; Proteinase inhibitor I3, Kunitz legume	GO:0004866	endopeptidase inhibitor activity [GO:0004866]			159	1	17.4437	7.73779	14.47	8	1	2	3	6.29	14.47	0	1	2		2.34886e+08	1.88289e+08	0		1
D3G6Z8	Glutathione S-transferase (Fragment) OS=Brassica juncea GN=GST PE=2 SV=1 - [D3G6Z8_BRAJU]	Glutathione S-transferase (Fragment)	Brassica juncea (Indian mustard) (Sinapis juncea)	IPR010987;IPR004045;IPR004046;IPR034347;IPR012336;	Glutathione S-transferase, C-terminal-like; Glutathione S-transferase, N-terminal; Glutathione S-transferase, C-terminal; Glutathione S-transferases Phi, C-terminal; Thioredoxin-like fold	GO:0016740	transferase activity [GO:0016740]			201	1.005	22.6297	6.21436	8.46	10	2	2	3	3.98	4.48	0	1	1		25640642	6.20444e+07	0
A0A0A7PAQ2	Carbonic anhydrase OS=Orychophragmus violaceus PE=2 SV=1 - [A0A0A7PAQ2_ORYVI]	Carbonic anhydrase (EC 4.2.1.1) (Carbonate dehydratase)	Orychophragmus violaceus (Chinese violet cress) (Brassica violacea)	IPR001765;IPR015892;	Carbonic anhydrase; Carbonic anhydrase, prokaryotic-like, conserved site	GO:0004089; GO:0008270; GO:0015976	carbonate dehydratase activity [GO:0004089]; zinc ion binding [GO:0008270]		carbon utilization [GO:0015976]	331	1.655	35.7993	5.57959	7.85	13	2	2	3	7.85	5.14		2	1		4.80857e+06	7.93729e+06	0
A0A078BTC9	BnaA07g15170D protein OS=Brassica napus GN=BnaA07g15170D PE=4 SV=1 - [A0A078BTC9_BRANA]	BnaA07g15170D protein	Brassica napus (Rape)	IPR001107;IPR000163;	Band 7 domain; Prohibitin	GO:0016020		membrane [GO:0016020]		277	1.385	30.4281	8.32373	12.27	9	3	3	3	0	12.27	0		3		0	8.98923e+06	0		1
A0A078C666	Peroxidase OS=Brassica napus GN=BnaC07g44240D PE=3 SV=1 - [A0A078C666_BRANA]	Peroxidase (EC 1.11.1.7)	Brassica napus (Rape)	IPR010255;IPR002016;IPR000823;IPR019794;IPR019793;IPR033905;	Haem peroxidase; Haem peroxidase, plant/fungal/bacterial; Plant peroxidase; Peroxidase, active site; Peroxidases heam-ligand binding site; Secretory peroxidase	GO:0004601; GO:0005576; GO:0006979; GO:0016021; GO:0020037; GO:0042744; GO:0046872	heme binding [GO:0020037]; metal ion binding [GO:0046872]; peroxidase activity [GO:0004601]	extracellular region [GO:0005576]; integral component of membrane [GO:0016021]	hydrogen peroxide catabolic process [GO:0042744]; response to oxidative stress [GO:0006979]	319	1.595	35.0284	8.42627	5.96	5	2	2	3	0	5.96	2.51		2	1	0	7.36731e+06	1.8122e+07
A0A078C9S3	BnaC08g24060D protein OS=Brassica napus GN=BnaC08g24060D PE=4 SV=1 - [A0A078C9S3_BRANA]	BnaC08g24060D protein	Brassica napus (Rape)	IPR023753;IPR016156;	FAD/NAD(P)-binding domain; FAD/NAD-linked reductase, dimerisation domain	GO:0016491; GO:0050660	flavin adenine dinucleotide binding [GO:0050660]; oxidoreductase activity [GO:0016491]			434	2.17	46.461	6.0874	6.45	7	2	2	3	0	6.45	0		2		0	1.69438e+07	0
A0A078DXA8	BnaA03g37810D protein OS=Brassica napus GN=BnaA03g37810D PE=4 SV=1 - [A0A078DXA8_BRANA]	BnaA03g37810D protein	Brassica napus (Rape)	IPR000782;	FAS1 domain					256	1.28	27.104	6.52197	10.55	2	2	2	3	0	3.52	10.55		1	2	0	1.0781e+08	0
A0A078E758	BnaC09g45990D protein OS=Brassica napus GN=BnaC09g45990D PE=4 SV=1 - [A0A078E758_BRANA]	BnaC09g45990D protein	Brassica napus (Rape)	IPR026891;IPR002772;IPR001764;IPR017853;IPR013783;	Fibronectin type III-like domain; Glycoside hydrolase family 3 C-terminal domain; Glycoside hydrolase, family 3, N-terminal; Glycoside hydrolase superfamily; Immunoglobulin-like fold	GO:0004553; GO:0005975	hydrolase activity, hydrolyzing O-glycosyl compounds [GO:0004553]		carbohydrate metabolic process [GO:0005975]	751	3.755	82.1172	6.354	2.8	4	2	2	3	0	2.8	1.07		2	1	0	1.50271e+07	1.83203e+07
A0A078FU19	V-type proton ATPase subunit F OS=Brassica napus GN=BnaC03g30820D PE=3 SV=1 - [A0A078FU19_BRANA]	V-type proton ATPase subunit F	Brassica napus (Rape)	IPR008218;IPR005772;	ATPase, V1 complex, subunit F; ATPase, V1 complex, subunit F, eukaryotic	GO:0015991; GO:0033180; GO:0046961	proton-transporting ATPase activity, rotational mechanism [GO:0046961]	proton-transporting V-type ATPase, V1 domain [GO:0033180]	ATP hydrolysis coupled proton transport [GO:0015991]	128	1	14.2544	6.56592	8.59	2	3	3	3	0	8.59	0		3		0	1.36488e+07	0
A0A078GCV8	BnaA04g05380D protein OS=Brassica napus GN=BnaA04g05380D PE=3 SV=1 - [A0A078GCV8_BRANA]	BnaA04g05380D protein	Brassica napus (Rape)	IPR001461;IPR001969;IPR034161;IPR033121;IPR021109;IPR032799;IPR032861;	Aspartic peptidase A1 family; Aspartic peptidase, active site; Pepsin-like domain, plant; Peptidase family A1 domain; Aspartic peptidase domain; Xylanase inhibitor, C-terminal; Xylanase inhibitor, N-terminal	GO:0004190	aspartic-type endopeptidase activity [GO:0004190]			473	2.365	51.0687	8.22119	6.98	8	3	3	3	4.86	0	2.11	2		1	1.01519e+07	0	5.04664e+06
A0A078IH26	BnaC08g14790D protein OS=Brassica napus GN=BnaC08g14790D PE=4 SV=1 - [A0A078IH26_BRANA]	BnaC08g14790D protein	Brassica napus (Rape)	IPR024058;IPR002325;IPR024094;IPR011054;	Cytochrome f transmembrane anchor; Cytochrome f; Cytochrome f large domain; Rudiment single hybrid motif	GO:0005506; GO:0009055; GO:0015979; GO:0020037; GO:0031361	electron carrier activity [GO:0009055]; heme binding [GO:0020037]; iron ion binding [GO:0005506]	integral component of thylakoid membrane [GO:0031361]	photosynthesis [GO:0015979]	101	1	11.154	4.66553	21.78	9	2	2	3	21.78	7.92	0	2	1		3.95263e+07	1.04121e+07	0	1				1
A0A078J5J7	BnaA09g52180D protein OS=Brassica napus GN=BnaA09g52180D PE=3 SV=1 - [A0A078J5J7_BRANA]	BnaA09g52180D protein	Brassica napus (Rape)	IPR025660;IPR013128;IPR000668;IPR012599;	Cysteine peptidase, histidine active site; Peptidase C1A; Peptidase C1A, papain C-terminal; Peptidase C1A, propeptide	GO:0004197; GO:0050790	cysteine-type endopeptidase activity [GO:0004197]		regulation of catalytic activity [GO:0050790]	358	1.79	38.949	6.16357	6.42	5	2	2	3	0	6.42	2.79		2	1	0	7.11163e+07	2.54222e+07
M4CJ91	Uncharacterized protein OS=Brassica rapa subsp. pekinensis PE=3 SV=1 - [M4CJ91_BRARP]	Uncharacterized protein	Brassica rapa subsp. pekinensis (Chinese cabbage) (Brassica pekinensis)	IPR006139;IPR029752;IPR006140;IPR016040;	D-isomer specific 2-hydroxyacid dehydrogenase, catalytic domain; D-isomer specific 2-hydroxyacid dehydrogenase, NAD-binding domain conserved site 1; D-isomer specific 2-hydroxyacid dehydrogenase, NAD-binding domain; NAD(P)-binding domain	GO:0016616; GO:0051287	NAD binding [GO:0051287]; oxidoreductase activity, acting on the CH-OH group of donors, NAD or NADP as acceptor [GO:0016616]			386	1.93	42.2239	8.104	8.81	7	3	3	3	3.63	2.85	2.33	1	1	1	574940	4.10325e+06	2.42642e+06
A0A0D3E2R1	Ferredoxin--NADP reductase OS=Brassica oleracea var. oleracea PE=3 SV=1 - [A0A0D3E2R1_BRAOL]	Ferredoxin--NADP reductase (EC 1.18.1.2)	Brassica oleracea var. oleracea	IPR017927;IPR001709;IPR015701;IPR035442;IPR001433;IPR017938;	Ferredoxin reductase-type FAD-binding domain; Flavoprotein pyridine nucleotide cytochrome reductase; Ferredoxin--NADP reductase; Oxidoreductase FAD/NAD(P)-binding; Riboflavin synthase-like beta-barrel	GO:0004324	ferredoxin-NADP+ reductase activity [GO:0004324]			362	1.81	40.6476	7.86963	9.67	8	2	3	3	0	9.67	0		3		0	1.47772e+07	0
A0A0D3AK69	Uncharacterized protein OS=Brassica oleracea var. oleracea PE=3 SV=1 - [A0A0D3AK69_BRAOL]	Uncharacterized protein	Brassica oleracea var. oleracea	IPR006045;IPR001929;IPR014710;IPR011051;	Cupin 1; Germin; RmlC-like jelly roll fold; RmlC-like cupin domain	GO:0005576; GO:0030145; GO:0045735	manganese ion binding [GO:0030145]; nutrient reservoir activity [GO:0045735]	extracellular region [GO:0005576]		218	1.09	22.4046	7.03467	5.96	2	2	2	3	0	5.96			2		0	1.56827e+08	0
M4E187	Uncharacterized protein OS=Brassica rapa subsp. pekinensis PE=4 SV=1 - [M4E187_BRARP]	Uncharacterized protein	Brassica rapa subsp. pekinensis (Chinese cabbage) (Brassica pekinensis)	IPR000907;IPR013819;IPR001246;IPR027433;IPR001024;	Lipoxygenase; Lipoxygenase, C-terminal; Lipoxygenase, plant; Lipoxygenase, domain 3; PLAT/LH2 domain	GO:0016702; GO:0046872	metal ion binding [GO:0046872]; oxidoreductase activity, acting on single donors with incorporation of molecular oxygen, incorporation of two atoms of oxygen [GO:0016702]			811	4.055	92.4792	5.57959	3.08	4	2	2	3	3.08	1.73	0	2	1		1.28e+07	6.11313e+06	0
A0A078I730	BnaC09g31980D protein OS=Brassica napus GN=BnaC09g31980D PE=4 SV=1 - [A0A078I730_BRANA]	BnaC09g31980D protein	Brassica napus (Rape)	IPR030395;IPR017946;	Glycerophosphodiester phosphodiesterase domain; PLC-like phosphodiesterase, TIM beta/alpha-barrel domain	GO:0006629; GO:0008081; GO:0016021	phosphoric diester hydrolase activity [GO:0008081]	integral component of membrane [GO:0016021]	lipid metabolic process [GO:0006629]	653	3.265	71.7037	5.60498	5.51	7	2	2	3		5.51	3.68		2	1	0	0	4.7982e+06
M4DEN4	Cyanate hydratase OS=Brassica rapa subsp. pekinensis GN=CYN PE=3 SV=1 - [M4DEN4_BRARP]	Cyanate hydratase (Cyanase) (EC 4.2.1.104) (Cyanate hydrolase) (Cyanate lyase)	Brassica rapa subsp. pekinensis (Chinese cabbage) (Brassica pekinensis)	IPR008076;IPR003712;IPR010982;	Cyanate hydratase; Cyanate lyase, C-terminal; Lambda repressor-like, DNA-binding domain	GO:0003677; GO:0005829; GO:0008824; GO:0009440; GO:0009651; GO:0042802	cyanate hydratase activity [GO:0008824]; DNA binding [GO:0003677]; identical protein binding [GO:0042802]	cytosol [GO:0005829]	cyanate catabolic process [GO:0009440]; response to salt stress [GO:0009651]	168	1	18.6796	6.58057	17.26	4	2	2	3		17.26	4.76		2	1	0	2.7428e+07	1.44072e+07		1
A0A0D3B785	Uncharacterized protein OS=Brassica oleracea var. oleracea PE=4 SV=1 - [A0A0D3B785_BRAOL]	Uncharacterized protein	Brassica oleracea var. oleracea	IPR016123;IPR002683;	Mog1/PsbP, alpha/beta/alpha sandwich; PsbP family	GO:0005509; GO:0009654; GO:0015979; GO:0019898	calcium ion binding [GO:0005509]	extrinsic component of membrane [GO:0019898]; photosystem II oxygen evolving complex [GO:0009654]	photosynthesis [GO:0015979]	163	1	18.1734	5.41455	14.72	8	2	2	3		14.72	8.59		2	1	0	2.75388e+06	1.32301e+06		1
A0A078DUP1	BnaA03g26130D protein OS=Brassica napus GN=BnaA03g26130D PE=3 SV=1 - [A0A078DUP1_BRANA]	BnaA03g26130D protein	Brassica napus (Rape)	IPR010987;IPR004045;IPR004046;IPR034347;IPR012336;	Glutathione S-transferase, C-terminal-like; Glutathione S-transferase, N-terminal; Glutathione S-transferase, C-terminal; Glutathione S-transferases Phi, C-terminal; Thioredoxin-like fold					213	1.065	23.9416	7.75244	10.8	19	2	2	2	0	10.8	0		2		0	3.30561e+07	0		1
Q6R1M8	Putative proteasome 20S beta1.1 subunit (Fragment) OS=Brassica napus PE=2 SV=1 - [Q6R1M8_BRANA]	Putative proteasome 20S beta1.1 subunit (Fragment)	Brassica napus (Rape)	IPR029055;IPR035140;IPR001353;IPR023333;	Nucleophile aminohydrolases, N-terminal; Proteasome, subunit alpha/beta; Proteasome B-type subunit	GO:0004298; GO:0005839; GO:0051603	threonine-type endopeptidase activity [GO:0004298]	proteasome core complex [GO:0005839]	proteolysis involved in cellular protein catabolic process [GO:0051603]	172	1	18.6144	8.104	12.21	9	2	2	2	6.4	5.81	0	1	1		0	4678521	0
Q4FCQ4	Phosphoenolpyruvate carboxylase (Fragment) OS=Brassica napus PE=2 SV=1 - [Q4FCQ4_BRANA]	Phosphoenolpyruvate carboxylase (Fragment)	Brassica napus (Rape)	IPR021135;IPR018129;IPR033129;IPR015813;	Phosphoenolpyruvate carboxylase; Phosphoenolpyruvate carboxylase, Lys active site; Phosphoenolpyruvate carboxylase, His active site; Pyruvate/Phosphoenolpyruvate kinase-like domain	GO:0006099; GO:0008964; GO:0015977	phosphoenolpyruvate carboxylase activity [GO:0008964]		carbon fixation [GO:0015977]; tricarboxylic acid cycle [GO:0006099]	526	2.63	59.8136	5.8335	4.37	29	2	2	2	4.37	0	0	2			1.13072e+07	0	0
A0A078E819	Amine oxidase OS=Brassica napus GN=BnaA02g21420D PE=3 SV=1 - [A0A078E819_BRANA]	Amine oxidase (EC 1.4.3.-)	Brassica napus (Rape)	IPR000269;IPR015798;IPR016182;IPR015800;IPR015802;	Copper amine oxidase; Copper amine oxidase, C-terminal; Copper amine oxidase, N-terminal; Copper amine oxidase, N2-terminal; Copper amine oxidase, N3-terminal	GO:0005507; GO:0008131; GO:0009308; GO:0048038	copper ion binding [GO:0005507]; primary amine oxidase activity [GO:0008131]; quinone binding [GO:0048038]		amine metabolic process [GO:0009308]	743	3.715	83.4328	5.97314	2.83	4	2	2	2	0	2.83	0		2		0	9.73707e+06	0
A0A078FEN2	BnaC07g15930D protein OS=Brassica napus GN=BnaC07g15930D PE=4 SV=1 - [A0A078FEN2_BRANA]	BnaC07g15930D protein	Brassica napus (Rape)	IPR003137;IPR000209;IPR023828;IPR015500;IPR034197;IPR010259;	PA domain; Peptidase S8/S53 domain; Peptidase S8, subtilisin, Ser-active site; Peptidase S8, subtilisin-related; Cucumisin-like catalytic domain; Peptidase S8 propeptide/proteinase inhibitor I9	GO:0004252	serine-type endopeptidase activity [GO:0004252]			760	3.8	79.926	6.7124	8.82	4	2	2	2	0	8.82	0		2		0	1.06643e+06	0
A0A078JQZ3	Pectinesterase (Fragment) OS=Brassica napus GN=BnaCnng60750D PE=4 SV=1 - [A0A078JQZ3_BRANA]	Pectinesterase (EC 3.1.1.11) (Fragment)	Brassica napus (Rape)	IPR012334;IPR011050;IPR033131;IPR000070;IPR006501;	Pectin lyase fold; Pectin lyase fold/virulence factor; Pectinesterase, Asp active site; Pectinesterase, catalytic; Pectinesterase inhibitor domain	GO:0004857; GO:0005618; GO:0030599; GO:0042545; GO:0045330; GO:0045490	aspartyl esterase activity [GO:0045330]; enzyme inhibitor activity [GO:0004857]; pectinesterase activity [GO:0030599]	cell wall [GO:0005618]	cell wall modification [GO:0042545]; pectin catabolic process [GO:0045490]	435	2.175	48.1147	7.18115	5.06	64	1	2	2	0	5.06	0		2		0	1.27313e+08	0
A0A0D3DXW2	Aminomethyltransferase OS=Brassica oleracea var. oleracea PE=3 SV=1 - [A0A0D3DXW2_BRAOL]	Aminomethyltransferase (EC 2.1.2.10) (Glycine cleavage system T protein)	Brassica oleracea var. oleracea	IPR006223;IPR028896;IPR013977;IPR006222;IPR029043;	Glycine cleavage system T protein; Aminomethyltransferase/Dimethylsulfonioproprionate demethylase DmdA; Glycine cleavage T-protein, C-terminal barrel domain; Glycine cleavage T-protein-like, N-terminal; Glycine cleavage T-protein/YgfZ, C-terminal domain	GO:0004047; GO:0005739; GO:0006546; GO:0008483	aminomethyltransferase activity [GO:0004047]; transaminase activity [GO:0008483]	mitochondrion [GO:0005739]	glycine catabolic process [GO:0006546]	408	2.04	44.4108	8.646	5.39	7	2	2	2	5.39	0	0	2			7.97774e+06	0	0
A0A0D2ZZ97	Uncharacterized protein OS=Brassica oleracea var. oleracea PE=4 SV=2 - [A0A0D2ZZ97_BRAOL]	Uncharacterized protein	Brassica oleracea var. oleracea	IPR030513;	Dehydrin, conserved site					121	1	13.836	5.89697	15.7	3	2	2	2	0	15.7	0		2		0	2.47986e+06	0		1
A0A0D3D7X1	Uncharacterized protein OS=Brassica oleracea var. oleracea PE=4 SV=1 - [A0A0D3D7X1_BRAOL]	Uncharacterized protein	Brassica oleracea var. oleracea	IPR017927;IPR001709;IPR015701;IPR035442;IPR008333;IPR001433;IPR017938;	Ferredoxin reductase-type FAD-binding domain; Flavoprotein pyridine nucleotide cytochrome reductase; Ferredoxin--NADP reductase; Oxidoreductase, FAD-binding domain; Oxidoreductase FAD/NAD(P)-binding; Riboflavin synthase-like beta-barrel	GO:0016491	oxidoreductase activity [GO:0016491]			357	1.785	39.7501	8.52881	4.76	8	1	2	2	0	4.76	0		2		0	2.62706e+07	0
A0A078GCE2	Aldose 1-epimerase OS=Brassica napus GN=BnaC03g57220D PE=3 SV=1 - [A0A078GCE2_BRANA]	Aldose 1-epimerase (EC 5.1.3.3) (Galactose mutarotase)	Brassica napus (Rape)	IPR015443;IPR008183;IPR011013;IPR014718;	Aldose 1-epimerase; Aldose 1-/Glucose-6-phosphate 1-epimerase; Galactose mutarotase-like domain; Glycoside hydrolase-type carbohydrate-binding	GO:0004034; GO:0019318; GO:0030246	aldose 1-epimerase activity [GO:0004034]; carbohydrate binding [GO:0030246]		hexose metabolic process [GO:0019318]	359	1.795	39.7255	8.27979	13.65	2	2	2	2		5.57	8.08		1	1	0	5.4412e+06	1.06992e+07

## Sheet: present 10% cov
Combined raw data for proteins released from indehiscent pericarps of S. alba upon hydration (replicates 1-3)
Accession	Description	Protein names	Organism	Interpro_IDs	Interpro_names	Gene ontology IDs	Gene ontology (molecular function)	Gene ontology (cellular component)	Gene ontology (biological process)	# AAs	No. peptides cutoff	MW [kDa]	calc. pI	ΣCoverage	Σ# Proteins	Σ# Unique Peptides	Σ# Peptides	Σ# PSMs	rep1 coverage	rep2 coverage	rep3 coverage	rep1 peptides	rep2 peptides	rep3 peptides	rep1	rep2	rep3	rep1 present 10%cov	rep2 present 10%cov	rep3 present 10%cov	Present 10% cov	rep1 present 20%cov	rep2 present 20%cov	rep3 present 20%cov	Present 20% Cov
A0A078CBV1	BnaA04g08680D protein OS=Brassica napus GN=BnaA04g08680D PE=3 SV=1 - [A0A078CBV1_BRANA]	BnaA04g08680D protein	Brassica napus (Rape)	IPR000308;IPR023409;IPR023410;	14-3-3 protein; 14-3-3 protein, conserved site; 14-3-3 domain	GO:0019904	protein domain specific binding [GO:0019904]			257	1.285	28.8594	4.76709	12.45	50	1	3	11	7.78	7.78	9.34	2	2	2	3.45393e+08	6.21193e+06	5.94217e+06	1	1	1	1
A0A078JY23	BnaCnng72220D protein OS=Brassica napus GN=BnaCnng72220D PE=3 SV=1 - [A0A078JY23_BRANA]	BnaCnng72220D protein	Brassica napus (Rape)	IPR000308;IPR023409;IPR023410;	14-3-3 protein; 14-3-3 protein, conserved site; 14-3-3 domain	GO:0019904	protein domain specific binding [GO:0019904]			257	1.285	28.8734	4.79248	12.45	45	1	3	11	7.78	7.78	4.67	2	2	1	3.45393e+08	23494970	3.82146e+06	1	1		1
A0A068LAZ4	ATP synthase subunit beta, chloroplastic OS=Raphanus sativus GN=atpB PE=3 SV=1 - [A0A068LAZ4_RAPSA]	ATP synthase subunit beta, chloroplastic (EC 3.6.3.14) (ATP synthase F1 sector subunit beta) (F-ATPase subunit beta)	Raphanus sativus (Radish)	IPR003593;IPR005722;IPR020003;IPR004100;IPR000194;IPR024034;IPR027417;	AAA+ ATPase domain; ATP synthase, F1 complex, beta subunit; ATPase, alpha/beta subunit, nucleotide-binding domain, active site; ATPase, F1/V1/A1 complex, alpha/beta subunit, N-terminal domain; ATPase, F1/V1/A1 complex, alpha/beta subunit, nucleotide-binding domain; ATPase, F1/V1 complex, beta/alpha subunit, C-terminal; P-loop containing nucleoside triphosphate hydrolase	GO:0005524; GO:0009535; GO:0015986; GO:0045261; GO:0046933	ATP binding [GO:0005524]; proton-transporting ATP synthase activity, rotational mechanism [GO:0046933]	chloroplast thylakoid membrane [GO:0009535]; proton-transporting ATP synthase complex, catalytic core F(1) [GO:0045261]	ATP synthesis coupled proton transport [GO:0015986]	498	2.49	53.7662	5.88428	25.9	18	9	10	42	18.07	21.49	15.86	6	9	6	8.20141e+07	1.05055e+08	6.94726e+06	1	1	1	1	1	1	1	1
A0A078I5P1	ATP synthase subunit beta OS=Brassica napus GN=BnaC02g01030D PE=3 SV=1 - [A0A078I5P1_BRANA]	ATP synthase subunit beta (EC 3.6.3.14)	Brassica napus (Rape)	IPR003593;IPR005722;IPR020003;IPR004100;IPR000194;IPR024034;IPR027417;	AAA+ ATPase domain; ATP synthase, F1 complex, beta subunit; ATPase, alpha/beta subunit, nucleotide-binding domain, active site; ATPase, F1/V1/A1 complex, alpha/beta subunit, N-terminal domain; ATPase, F1/V1/A1 complex, alpha/beta subunit, nucleotide-binding domain; ATPase, F1/V1 complex, beta/alpha subunit, C-terminal; P-loop containing nucleoside triphosphate hydrolase	GO:0005524; GO:0015986; GO:0045261; GO:0046933	ATP binding [GO:0005524]; proton-transporting ATP synthase activity, rotational mechanism [GO:0046933]	proton-transporting ATP synthase complex, catalytic core F(1) [GO:0045261]	ATP synthesis coupled proton transport [GO:0015986]	449	2.245	48.5843	5.63037	32.74	22	9	10	41	22.72	20.49	22.94	7	7	7	9.02187e+07	7.55533e+07	6.48464e+06	1	1	1	1	1	1	1	1
A0A078EW34	BnaA02g32350D protein OS=Brassica napus GN=BnaA02g32350D PE=4 SV=1 - [A0A078EW34_BRANA]	BnaA02g32350D protein	Brassica napus (Rape)	IPR005519;IPR010028;IPR014403;IPR023214;	Acid phosphatase, class B-like; Acid phosphatase, plant; Vegetative storage protein/acid phosphatase; HAD-like domain	GO:0003993	acid phosphatase activity [GO:0003993]			268	1.34	30.5838	6.23975	16.79	1	1	6	53	16.42	16.79	16.79	4	6	5	8.08728e+07	7.04824e+08	9.64047e+07	1	1	1	1
A0A078F0M0	BnaC02g41060D protein OS=Brassica napus GN=BnaC02g41060D PE=4 SV=1 - [A0A078F0M0_BRANA]	BnaC02g41060D protein	Brassica napus (Rape)	IPR005519;IPR010028;IPR014403;IPR023214;	Acid phosphatase, class B-like; Acid phosphatase, plant; Vegetative storage protein/acid phosphatase; HAD-like domain	GO:0003993	acid phosphatase activity [GO:0003993]			268	1.34	30.588	6.93213	21.27	1	3	8	52	11.94	21.27	19.03	3	8	5	5.24418e+07	6.02158e+08	9.40728e+07	1	1	1	1	1	1	1	1
A0A078FM80	BnaA08g13470D protein OS=Brassica napus GN=BnaA08g13470D PE=4 SV=1 - [A0A078FM80_BRANA]	BnaA08g13470D protein	Brassica napus (Rape)	IPR005519;IPR010028;IPR014403;IPR023214;	Acid phosphatase, class B-like; Acid phosphatase, plant; Vegetative storage protein/acid phosphatase; HAD-like domain	GO:0003993	acid phosphatase activity [GO:0003993]			263	1.315	29.4578	7.89893	15.21	4	3	3	8	11.41	15.21	7.6	2	3	1	5.19878e+06	4.4295e+07	3.36785e+06	1	1		1
A0A078G9C9	BnaA10g22340D protein OS=Brassica napus GN=BnaC09g46850D PE=3 SV=1 - [A0A078G9C9_BRANA]	BnaA10g22340D protein (BnaC09g46850D protein)	Brassica napus (Rape)	IPR004000;IPR020902;IPR004001;	Actin family; Actin/actin-like conserved site; Actin, conserved site	GO:0005524	ATP binding [GO:0005524]			377	1.885	41.663	5.49072	20.69	82	6	6	28	16.45	10.34	14.59	5	3	4	3.85896e+08	2.07196e+08	1.48843e+08	1	1	1	1	1	1	1	1
Q6ZZ92	Adenosine nucleotide translocator (Fragment) OS=Brassica oleracea var. viridis GN=ANT PE=2 SV=1 - [Q6ZZ92_BRAOV]	Adenosine nucleotide translocator (Fragment)	Brassica oleracea var. viridis (Flowering kale) (Brassica oleracea var. acephala)	IPR002113;IPR002067;IPR018108;IPR023395;	Adenine nucleotide translocator 1; Mitochondrial carrier protein; Mitochondrial substrate/solute carrier; Mitochondrial carrier domain	GO:0005215; GO:0005743; GO:0016021; GO:0055085	transporter activity [GO:0005215]	integral component of membrane [GO:0016021]; mitochondrial inner membrane [GO:0005743]	transmembrane transport [GO:0055085]	322	1.61	34.9992	9.70068	13.98	14	5	5	19	11.49	13.98	8.39	4	5	3	2.71044e+08	2.26751e+08	1.67903e+08	1	1	1	1
A0A078H3K2	BnaC01g36930D protein OS=Brassica napus GN=BnaC01g36930D PE=3 SV=1 - [A0A078H3K2_BRANA]	BnaC01g36930D protein	Brassica napus (Rape)	IPR013785;IPR012133;IPR000262;IPR008259;	Aldolase-type TIM barrel; Alpha-hydroxy acid dehydrogenase, FMN-dependent; FMN-dependent dehydrogenase; FMN-dependent alpha-hydroxy acid dehydrogenase, active site	GO:0010181; GO:0016491	FMN binding [GO:0010181]; oxidoreductase activity [GO:0016491]			357	1.785	39.2457	9.31982	15.97	18	1	5	18	15.97	12.89	10.08	5	4	3	7.05874e+07	3.31768e+07	2.29611e+07	1	1	1	1
A0A078CXF9	BnaC01g08070D protein OS=Brassica napus GN=BnaC09g08480D PE=3 SV=1 - [A0A078CXF9_BRANA]	BnaC01g08070D protein (BnaC09g08480D protein) (BnaC09g39400D protein)	Brassica napus (Rape)	IPR013785;IPR012133;IPR000262;IPR008259;	Aldolase-type TIM barrel; Alpha-hydroxy acid dehydrogenase, FMN-dependent; FMN-dependent dehydrogenase; FMN-dependent alpha-hydroxy acid dehydrogenase, active site	GO:0010181; GO:0016491	FMN binding [GO:0010181]; oxidoreductase activity [GO:0016491]			357	1.785	39.2807	9.18799	15.97	16	1	5	14	15.97	10.08	7.28	5	3	2	6.07058e+07	4.20106e+07	3.38538e+07	1	1	1	1
A0A078EPB1	BnaC04g25490D protein OS=Brassica napus GN=BnaC04g25490D PE=3 SV=1 - [A0A078EPB1_BRANA]	BnaC04g25490D protein	Brassica napus (Rape)	IPR013785;IPR022896;IPR000652;IPR020861;	Aldolase-type TIM barrel; Triosephosphate isomerase, bacterial/eukaryotic; Triosephosphate isomerase; Triosephosphate isomerase, active site	GO:0004807; GO:0006096	triose-phosphate isomerase activity [GO:0004807]		glycolytic process [GO:0006096]	254	1.27	27.1411	5.98584	17.72	6	1	4	26	11.42	17.72	17.72	2	4	4	1.55174e+07	3.08657e+07	1.13817e+07	1	1	1	1
A0A078EQK7	BnaC04g25470D protein OS=Brassica napus GN=BnaC04g25470D PE=3 SV=1 - [A0A078EQK7_BRANA]	BnaC04g25470D protein	Brassica napus (Rape)	IPR013785;IPR022896;IPR000652;IPR020861;	Aldolase-type TIM barrel; Triosephosphate isomerase, bacterial/eukaryotic; Triosephosphate isomerase; Triosephosphate isomerase, active site	GO:0004807; GO:0006096	triose-phosphate isomerase activity [GO:0004807]		glycolytic process [GO:0006096]	253	1.265	27.001	5.98584	20.16	10	1	4	22	5.53	20.16	11.86	1	4	3	2.95131e+07	2.77504e+07	1.13817e+07		1	1	1		1	1	1
A0A0D3CL44	Uncharacterized protein OS=Brassica oleracea var. oleracea PE=4 SV=1 - [A0A0D3CL44_BRAOL]	Uncharacterized protein	Brassica oleracea var. oleracea	IPR000866;IPR024706;IPR019479;IPR012336;IPR013766;	Alkyl hydroperoxide reductase subunit C/ Thiol specific antioxidant; Peroxiredoxin, AhpC-type; Peroxiredoxin, C-terminal; Thioredoxin-like fold; Thioredoxin domain	GO:0005623; GO:0045454; GO:0051920	peroxiredoxin activity [GO:0051920]	cell [GO:0005623]	cell redox homeostasis [GO:0045454]	254	1.27	27.9193	5.69385	31.1	19	6	6	29	22.44	25.59	31.1	3	5	6	3.34491e+06	7.24742e+07	1.51903e+07	1	1	1	1	1	1	1	1
A0A078CFG1	BnaA01g01420D protein OS=Brassica napus GN=BnaA01g01420D PE=4 SV=1 - [A0A078CFG1_BRANA]	BnaA01g01420D protein	Brassica napus (Rape)	IPR029058;IPR008758;	Alpha/Beta hydrolase fold; Peptidase S28	GO:0008236	serine-type peptidase activity [GO:0008236]			488	2.44	54.7182	7.1665	10.66	11	4	4	12	2.05	10.66	8.2	1	4	3	9.78735e+06	9.66427e+06	2.50608e+06		1	1	1
A0A078CSV9	BnaA09g34280D protein OS=Brassica napus GN=BnaA09g34280D PE=3 SV=1 - [A0A078CSV9_BRANA]	BnaA09g34280D protein	Brassica napus (Rape)	IPR001461;IPR033121;IPR021109;IPR032799;IPR032861;	Aspartic peptidase A1 family; Peptidase family A1 domain; Aspartic peptidase domain; Xylanase inhibitor, C-terminal; Xylanase inhibitor, N-terminal	GO:0004190	aspartic-type endopeptidase activity [GO:0004190]			430	2.15	46.0673	9.17334	10.23	4	3	4	14	5.81	8.14	10.23	2	3	4	3.0271e+07	1.26155e+07	1.14297e+07		1	1	1
M4EP06	Uncharacterized protein OS=Brassica rapa subsp. pekinensis PE=3 SV=1 - [M4EP06_BRARP]	Uncharacterized protein	Brassica rapa subsp. pekinensis (Chinese cabbage) (Brassica pekinensis)	IPR001461;IPR033121;IPR021109;IPR032799;IPR032861;IPR033868;	Aspartic peptidase A1 family; Peptidase family A1 domain; Aspartic peptidase domain; Xylanase inhibitor, C-terminal; Xylanase inhibitor, N-terminal; Xylanase inhibitor I-like	GO:0004190	aspartic-type endopeptidase activity [GO:0004190]			414	2.07	43.6652	8.26514	11.84	5	5	5	43	11.59	11.84	11.59	4	5	4	2.95628e+08	3.3601e+08	3.75379e+08	1	1	1	1
A0A1B1YY37	ATP synthase subunit alpha, chloroplastic OS=Cakile arabica GN=atpA PE=3 SV=1 - [A0A1B1YY37_9BRAS]	ATP synthase subunit alpha, chloroplastic (EC 3.6.3.14) (ATP synthase F1 sector subunit alpha) (F-ATPase subunit alpha)	Cakile arabica	IPR023366;IPR000793;IPR033732;IPR005294;IPR020003;IPR004100;IPR000194;IPR027417;	ATP synthase subunit alpha-like domain; ATP synthase, alpha subunit, C-terminal; ATP synthase, F1 complex, alpha subunit nucleotide-binding domain; ATP synthase, F1 complex, alpha subunit; ATPase, alpha/beta subunit, nucleotide-binding domain, active site; ATPase, F1/V1/A1 complex, alpha/beta subunit, N-terminal domain; ATPase, F1/V1/A1 complex, alpha/beta subunit, nucleotide-binding domain; P-lo…	GO:0005524; GO:0009535; GO:0015986; GO:0045261; GO:0046933	ATP binding [GO:0005524]; proton-transporting ATP synthase activity, rotational mechanism [GO:0046933]	chloroplast thylakoid membrane [GO:0009535]; proton-transporting ATP synthase complex, catalytic core F(1) [GO:0045261]	ATP synthesis coupled proton transport [GO:0015986]	507	2.535	55.28	5.13525	31.36	11	10	12	51	28.6	23.67	15.58	10	9	6	2.13549e+08	1.04998e+08	3.36488e+07	1	1	1	1	1	1	1	1
A0A088BGG7	ATP synthase subunit alpha OS=Eruca sativa GN=atp1 PE=3 SV=1 - [A0A088BGG7_ERUSA]	ATP synthase subunit alpha	Eruca sativa (Garden rocket) (Eruca vesicaria subsp. sativa)	IPR023366;IPR000793;IPR033732;IPR005294;IPR020003;IPR004100;IPR000194;IPR027417;	ATP synthase subunit alpha-like domain; ATP synthase, alpha subunit, C-terminal; ATP synthase, F1 complex, alpha subunit nucleotide-binding domain; ATP synthase, F1 complex, alpha subunit; ATPase, alpha/beta subunit, nucleotide-binding domain, active site; ATPase, F1/V1/A1 complex, alpha/beta subunit, N-terminal domain; ATPase, F1/V1/A1 complex, alpha/beta subunit, nucleotide-binding domain; P-lo…	GO:0005524; GO:0005739; GO:0015986; GO:0045261; GO:0046933	ATP binding [GO:0005524]; proton-transporting ATP synthase activity, rotational mechanism [GO:0046933]	mitochondrion [GO:0005739]; proton-transporting ATP synthase complex, catalytic core F(1) [GO:0045261]	ATP synthesis coupled proton transport [GO:0015986]	507	2.535	55.0497	6.32861	23.47	22	8	10	43	11.24	21.5	10.45	5	9	5	8.87507e+07	1.18279e+08	2.46413e+07	1	1	1	1	1	1	1	1
A0A0D3C580	Uncharacterized protein OS=Brassica oleracea var. oleracea PE=4 SV=1 - [A0A0D3C580_BRAOL]	Uncharacterized protein	Brassica oleracea var. oleracea	IPR003959;IPR027417;	ATPase, AAA-type, core; P-loop containing nucleoside triphosphate hydrolase	GO:0005524	ATP binding [GO:0005524]			439	2.195	48.0802	6.65381	16.86	14	1	7	19	16.86	11.62	12.53	6	5	5	5.49755e+07	5.85313e+07	1.60423e+07	1	1	1	1
M4DKM4	Uncharacterized protein OS=Brassica rapa subsp. pekinensis PE=4 SV=1 - [M4DKM4_BRARP]	Uncharacterized protein	Brassica rapa subsp. pekinensis (Chinese cabbage) (Brassica pekinensis)	IPR003959;IPR027417;	ATPase, AAA-type, core; P-loop containing nucleoside triphosphate hydrolase	GO:0005524	ATP binding [GO:0005524]			443	2.215	48.5115	7.72314	16.7	14	1	7	16	13.32	8.13	12.42	5	4	5	5.49755e+07	5.85313e+07	1.60423e+07	1	1	1	1
M4EAJ6	Uncharacterized protein OS=Brassica rapa subsp. pekinensis PE=4 SV=1 - [M4EAJ6_BRARP]	Uncharacterized protein	Brassica rapa subsp. pekinensis (Chinese cabbage) (Brassica pekinensis)	IPR020003;IPR004100;IPR000194;IPR024034;IPR027417;IPR022879;	ATPase, alpha/beta subunit, nucleotide-binding domain, active site; ATPase, F1/V1/A1 complex, alpha/beta subunit, N-terminal domain; ATPase, F1/V1/A1 complex, alpha/beta subunit, nucleotide-binding domain; ATPase, F1/V1 complex, beta/alpha subunit, C-terminal; P-loop containing nucleoside triphosphate hydrolase; V-type ATP synthase regulatory subunit B/beta	GO:0005524; GO:0015992; GO:0046034	ATP binding [GO:0005524]		ATP metabolic process [GO:0046034]; proton transport [GO:0015992]	404	2.02	45.128	5.16064	16.09	13	5	5	14	6.19	16.09	10.15	2	5	3	1.25934e+07	1.04635e+07	2.4575e+06		1	1	1
A0A0D3CEZ5	Uncharacterized protein OS=Brassica oleracea var. oleracea PE=3 SV=1 - [A0A0D3CEZ5_BRAOL]	Uncharacterized protein	Brassica oleracea var. oleracea	IPR012951;IPR016169;IPR016166;IPR016167;IPR006094;	Berberine/berberine-like; CO dehydrogenase flavoprotein-like, FAD-binding, subdomain 2; FAD-binding, type 2; FAD-binding, type 2, subdomain 1; FAD linked oxidase, N-terminal	GO:0016614; GO:0050660	flavin adenine dinucleotide binding [GO:0050660]; oxidoreductase activity, acting on CH-OH group of donors [GO:0016614]			530	2.65	59.8857	9.48096	12.08	6	6	6	14	2.08	7.17	6.98	1	4	3	7.22911e+07	3.01738e+07	1.3963e+07		1	1	1
M4DH11	Plastocyanin OS=Brassica rapa subsp. pekinensis PE=3 SV=1 - [M4DH11_BRARP]	Plastocyanin	Brassica rapa subsp. pekinensis (Chinese cabbage) (Brassica pekinensis)	IPR000923;IPR028871;IPR001235;IPR008972;IPR002387;	Blue (type 1) copper domain; Blue (type 1) copper protein, binding site; Blue (type 1) copper protein, plastocyanin-type; Cupredoxin; Plastocyanin	GO:0005507; GO:0009055; GO:0009535; GO:0055114	copper ion binding [GO:0005507]; electron carrier activity [GO:0009055]	chloroplast thylakoid membrane [GO:0009535]	oxidation-reduction process [GO:0055114]	116	1	11.9909	4.36084	24.14	2	2	2	8	0	24.14	24.14		2	2	0	2.36549e+07	1.587e+07		1	1	1		1	1	1
A0A078E2W5	Pectinesterase OS=Brassica napus GN=BnaC03g25220D PE=4 SV=1 - [A0A078E2W5_BRANA]	Pectinesterase (EC 3.1.1.11)	Brassica napus (Rape)	IPR006633;IPR012334;IPR011050;IPR033131;IPR000070;IPR006501;	Carbohydrate-binding/sugar hydrolysis domain; Pectin lyase fold; Pectin lyase fold/virulence factor; Pectinesterase, Asp active site; Pectinesterase, catalytic; Pectinesterase inhibitor domain	GO:0004857; GO:0005618; GO:0030599; GO:0042545; GO:0045330; GO:0045490	aspartyl esterase activity [GO:0045330]; enzyme inhibitor activity [GO:0004857]; pectinesterase activity [GO:0030599]	cell wall [GO:0005618]	cell wall modification [GO:0042545]; pectin catabolic process [GO:0045490]	445	2.225	48.5215	9.49561	31.69	8	7	11	122	28.99	31.69	27.42	9	11	8	3.69449e+08	5.52131e+08	1.54712e+08	1	1	1	1	1	1	1	1
A0A0D3BQ13	Pectinesterase OS=Brassica oleracea var. oleracea PE=4 SV=1 - [A0A0D3BQ13_BRAOL]	Pectinesterase (EC 3.1.1.11)	Brassica oleracea var. oleracea	IPR006633;IPR012334;IPR011050;IPR033131;IPR000070;IPR006501;	Carbohydrate-binding/sugar hydrolysis domain; Pectin lyase fold; Pectin lyase fold/virulence factor; Pectinesterase, Asp active site; Pectinesterase, catalytic; Pectinesterase inhibitor domain	GO:0004857; GO:0005618; GO:0030599; GO:0042545; GO:0045330; GO:0045490	aspartyl esterase activity [GO:0045330]; enzyme inhibitor activity [GO:0004857]; pectinesterase activity [GO:0030599]	cell wall [GO:0005618]	cell wall modification [GO:0042545]; pectin catabolic process [GO:0045490]	510	2.55	56.0783	9.43701	11.18	5	2	6	41	8.43	11.18	7.06	4	6	3	2.1271e+08	2.35561e+08	8.71597e+07	1	1	1	1
A0A0D3CBU1	Uncharacterized protein OS=Brassica oleracea var. oleracea PE=4 SV=1 - [A0A0D3CBU1_BRAOL]	Uncharacterized protein	Brassica oleracea var. oleracea	IPR018028;IPR020835;IPR024711;IPR011614;IPR002226;IPR010582;	Catalase, mono-functional, haem-containing; Catalase-like domain; Catalase, mono-functional, haem-containing, clades 1 and 3; Catalase core domain; Catalase haem-binding site; Catalase immune-responsive domain	GO:0004096; GO:0006979; GO:0020037; GO:0046872	catalase activity [GO:0004096]; heme binding [GO:0020037]; metal ion binding [GO:0046872]		response to oxidative stress [GO:0006979]	488	2.44	56.2694	7.81104	12.3	36	5	5	12	8.2	12.3	0	3	5		9.33861e+06	2.99434e+07	0	1	1		1
A0A078CWL9	BnaC03g03860D protein OS=Brassica napus GN=BnaC03g03860D PE=3 SV=1 - [A0A078CWL9_BRANA]	BnaC03g03860D protein	Brassica napus (Rape)	IPR012725;IPR018181;IPR029048;IPR029047;IPR013126;	Chaperone DnaK; Heat shock protein 70, conserved site; Heat shock protein 70kD, C-terminal domain; Heat shock protein 70kD, peptide-binding domain; Heat shock protein 70 family	GO:0005524; GO:0006457; GO:0051082	ATP binding [GO:0005524]; unfolded protein binding [GO:0051082]		protein folding [GO:0006457]	681	3.405	72.6946	5.69385	10.57	23	7	8	12	0	9.4	5.43		7	4	0	3.79168e+07	1.39308e+08		1	1	1
A0A078J6D0	BnaC04g53030D protein OS=Brassica napus GN=BnaC04g53030D PE=4 SV=1 - [A0A078J6D0_BRANA]	BnaC04g53030D protein	Brassica napus (Rape)	IPR001002;IPR018371;IPR016283;IPR000726;IPR023346;	Chitin-binding, type 1; Chitin-binding, type 1, conserved site; Glycoside hydrolase, family 19; Glycoside hydrolase, family 19, catalytic; Lysozyme-like domain	GO:0004568; GO:0005975; GO:0006032; GO:0008061; GO:0016998	chitinase activity [GO:0004568]; chitin binding [GO:0008061]		carbohydrate metabolic process [GO:0005975]; cell wall macromolecule catabolic process [GO:0016998]; chitin catabolic process [GO:0006032]	255	1.275	27.5679	7.60596	12.16	2	2	4	26	12.16	12.16	12.16	4	3	4	1.23119e+08	1.7999e+08	1.01651e+07	1	1	1	1
Q43391	Chitinase class IV (Fragment) OS=Brassica napus GN=LSC222 PE=4 SV=1 - [Q43391_BRANA]	Chitinase class IV (Fragment)	Brassica napus (Rape)	IPR001002;IPR018371;IPR016283;IPR000726;IPR023346;	Chitin-binding, type 1; Chitin-binding, type 1, conserved site; Glycoside hydrolase, family 19; Glycoside hydrolase, family 19, catalytic; Lysozyme-like domain	GO:0004568; GO:0005975; GO:0006032; GO:0008061; GO:0016998	chitinase activity [GO:0004568]; chitin binding [GO:0008061]		carbohydrate metabolic process [GO:0005975]; cell wall macromolecule catabolic process [GO:0016998]; chitin catabolic process [GO:0006032]	266	1.33	28.5063	5.2749	14.66	7	1	4	21	7.89	10.9	11.65	2	3	3	1.71838e+08	1.82085e+08	1.02955e+07	1	1	1	1
A0A0D3A4H8	Uncharacterized protein OS=Brassica oleracea var. oleracea PE=4 SV=1 - [A0A0D3A4H8_BRAOL]	Uncharacterized protein	Brassica oleracea var. oleracea	IPR011583;IPR029070;IPR001223;IPR017853;	Chitinase II; Chitinase insertion domain; Glycoside hydrolase family 18, catalytic domain; Glycoside hydrolase superfamily	GO:0005975; GO:0008061	chitin binding [GO:0008061]		carbohydrate metabolic process [GO:0005975]	380	1.9	41.2254	8.74854	21.05	9	1	5	28	11.05	21.05	15.26	3	5	3	3.09862e+07	3.40104e+07	6.12722e+06	1	1	1	1	1	1	1	1
A0A078J4U4	BnaA01g34980D protein OS=Brassica napus GN=BnaA01g34980D PE=4 SV=1 - [A0A078J4U4_BRANA]	BnaA01g34980D protein	Brassica napus (Rape)	IPR011583;IPR029070;IPR001223;IPR017853;	Chitinase II; Chitinase insertion domain; Glycoside hydrolase family 18, catalytic domain; Glycoside hydrolase superfamily	GO:0005975; GO:0008061	chitin binding [GO:0008061]		carbohydrate metabolic process [GO:0005975]	380	1.9	41.1934	9.0415	22.89	6	1	5	13	5	22.89	9.21	2	5	2	4.14292e+07	3.33027e+07	5.71719e+06	1	1	1	1	1	1	1	1
M4DZI3	Uncharacterized protein OS=Brassica rapa subsp. pekinensis PE=4 SV=1 - [M4DZI3_BRARP]	Uncharacterized protein	Brassica rapa subsp. pekinensis (Chinese cabbage) (Brassica pekinensis)	IPR016169;IPR016166;IPR016167;IPR006094;	CO dehydrogenase flavoprotein-like, FAD-binding, subdomain 2; FAD-binding, type 2; FAD-binding, type 2, subdomain 1; FAD linked oxidase, N-terminal	GO:0016614; GO:0050660	flavin adenine dinucleotide binding [GO:0050660]; oxidoreductase activity, acting on CH-OH group of donors [GO:0016614]			502	2.51	55.9656	8.29443	15.34	17	7	7	27	13.94	15.14	5.58	6	6	2	4.88155e+07	4.2837e+07	1.03895e+07	1	1		1
A0A078GBV7	BnaA02g03840D protein OS=Brassica napus GN=BnaA06g02110D PE=3 SV=1 - [A0A078GBV7_BRANA]	BnaA02g03840D protein (BnaA06g02110D protein) (BnaA10g14870D protein) (BnaC09g37240D protein)	Brassica napus (Rape)	IPR006045;IPR001929;IPR019780;IPR014710;IPR011051;	Cupin 1; Germin; Germin, manganese binding site; RmlC-like jelly roll fold; RmlC-like cupin domain	GO:0005576; GO:0030145; GO:0045735	manganese ion binding [GO:0030145]; nutrient reservoir activity [GO:0045735]	extracellular region [GO:0005576]		211	1.055	21.8874	6.52197	15.17	6	2	2	8	10.9	15.17	15.17	1	2	2	6.75615e+06	6.26607e+08	2.86737e+08		1	1	1
A0A078G1A8	BnaC01g20120D protein OS=Brassica napus GN=BnaC01g20120D PE=4 SV=1 - [A0A078G1A8_BRANA]	BnaC01g20120D protein	Brassica napus (Rape)	IPR008972;IPR003245;	Cupredoxin; Phytocyanin domain	GO:0009055	electron carrier activity [GO:0009055]			332	1.66	33.224	7.81104	17.77	4	5	5	33	6.93	17.77	13.86	3	5	4	1.07677e+08	1.43226e+08	5.6649e+07	1	1	1	1
Q38HW3	Protein disulfide-isomerase OS=Brassica carinata GN=PDI1 PE=3 SV=1 - [Q38HW3_BRACI]	Protein disulfide-isomerase (EC 5.3.4.1)	Brassica carinata (Ethiopian mustard) (Abyssinian cabbage)	IPR005788;IPR005792;IPR012336;IPR017937;IPR013766;	Disulphide isomerase; Protein disulphide isomerase; Thioredoxin-like fold; Thioredoxin, conserved site; Thioredoxin domain	GO:0003756; GO:0005783; GO:0045454	protein disulfide isomerase activity [GO:0003756]	endoplasmic reticulum [GO:0005783]	cell redox homeostasis [GO:0045454]	509	2.545	55.7062	5.12256	24.17	8	11	11	22	3.14	24.17	10.61	1	11	3	2.14087e+06	1.14574e+08	7.9857e+06		1	1	1		1	1	1
Q84WW8	Calmodulin 1 (Fragment) OS=Brassica oleracea GN=cam1 PE=2 SV=1 - [Q84WW8_BRAOL]	Calmodulin 1 (Fragment)	Brassica oleracea (Wild cabbage)	IPR011992;IPR018247;IPR002048;IPR023198;	EF-hand domain pair; EF-Hand 1, calcium-binding site; EF-hand domain; Phosphoglycolate phosphatase, domain 2	GO:0005509	calcium ion binding [GO:0005509]			137	1	15.4763	4.36084	48.18	24	1	3	25	21.17	48.18	48.18	2	3	3	3.61587e+07	6.32208e+07	1.84257e+07	1	1	1	1	1	1	1	1
A0A078FGE9	BnaA06g20230D protein OS=Brassica napus GN=BnaA06g20230D PE=4 SV=1 - [A0A078FGE9_BRANA]	BnaA06g20230D protein	Brassica napus (Rape)	IPR011992;IPR018247;IPR002048;IPR023198;	EF-hand domain pair; EF-Hand 1, calcium-binding site; EF-hand domain; Phosphoglycolate phosphatase, domain 2	GO:0005509	calcium ion binding [GO:0005509]			145	1	16.3927	4.36084	42.76	6	1	3	17	8.97	42.76	42.76	1	3	3	1.78987e+07	2.06157e+07	9.49548e+06		1	1	1		1	1	1
A0A078HGR1	BnaC03g41600D protein OS=Brassica napus GN=BnaC03g41600D PE=4 SV=1 - [A0A078HGR1_BRANA]	BnaC03g41600D protein	Brassica napus (Rape)	IPR013813;IPR006056;IPR019897;IPR006175;	Endoribonuclease L-PSP/chorismate mutase-like; RidA family; RidA, conserved site; YjgF/YER057c/UK114 family					180	1	19.2752	8.79248	30.56	5	1	5	30	26.67	30.56	30.56	4	5	5	1.98037e+07	4.61944e+07	2.12739e+07	1	1	1	1	1	1	1	1
A0A078IX60	BnaA05g36080D protein OS=Brassica napus GN=BnaA05g36080D PE=4 SV=1 - [A0A078IX60_BRANA]	BnaA05g36080D protein	Brassica napus (Rape)	IPR013813;IPR006056;IPR019897;IPR006175;	Endoribonuclease L-PSP/chorismate mutase-like; RidA family; RidA, conserved site; YjgF/YER057c/UK114 family					188	1	19.8404	8.39697	31.38	6	1	5	26	17.55	31.38	21.28	3	5	4	1.78782e+07	4.24153e+07	1.48344e+07	1	1	1	1	1	1	1	1
A0A078H5M7	BnaA05g07770D protein OS=Brassica napus GN=BnaC04g08780D PE=3 SV=1 - [A0A078H5M7_BRANA]	BnaA05g07770D protein (BnaC04g08780D protein)	Brassica napus (Rape)	IPR000941;IPR034390;IPR020810;IPR029065;IPR020809;IPR020811;IPR029017;	Enolase; Enolase-like superfamily; Enolase, C-terminal TIM barrel domain; Enolase C-terminal domain-like; Enolase, conserved site; Enolase, N-terminal; Enolase N-terminal domain-like	GO:0000015; GO:0000287; GO:0004634; GO:0006096	magnesium ion binding [GO:0000287]; phosphopyruvate hydratase activity [GO:0004634]	phosphopyruvate hydratase complex [GO:0000015]	glycolytic process [GO:0006096]	429	2.145	46.0784	5.5415	12.12	15	4	4	13	8.39	12.12	5.83	3	4	2	1.49717e+07	2.50092e+07	2.78511e+06	1	1		1
A0A078C440	BnaC08g31030D protein OS=Brassica napus GN=BnaC08g31030D PE=4 SV=1 - [A0A078C440_BRANA]	BnaC08g31030D protein	Brassica napus (Rape)	IPR000782;IPR033254;	FAS1 domain; Fasciclin-like arabinogalactan protein					422	2.11	43.4158	5.68115	12.8	4	2	4	9	0	12.8	10.9		4	3	0	1.01471e+07	4.75221e+06		1	1	1
A0A078CNJ8	BnaC08g32440D protein OS=Brassica napus GN=BnaC08g32440D PE=4 SV=1 - [A0A078CNJ8_BRANA]	BnaC08g32440D protein	Brassica napus (Rape)	IPR012347;	Ferritin-related					320	1.6	35.3938	6.25244	10.31	3	4	4	18	7.19	10.31	7.5	2	3	2	4.91992e+07	4.00156e+07	1.22364e+07	1	1	1	1
A0A078GAI4	Fructose-bisphosphate aldolase OS=Brassica napus GN=BnaA06g37230D PE=3 SV=1 - [A0A078GAI4_BRANA]	Fructose-bisphosphate aldolase (EC 4.1.2.13)	Brassica napus (Rape)	IPR029768;IPR013785;IPR000741;	Fructose-bisphosphate aldolase class-I active site; Aldolase-type TIM barrel; Fructose-bisphosphate aldolase, class-I	GO:0004332; GO:0006096	fructose-bisphosphate aldolase activity [GO:0004332]		glycolytic process [GO:0006096]	393	1.965	42.6089	7.79639	18.58	15	3	6	23	5.85	14.76	9.67	2	5	3	7.01258e+07	7.25099e+07	2.17557e+07	1	1	1	1
A0A078EC07	Fructose-bisphosphate aldolase OS=Brassica napus GN=BnaC04g33570D PE=3 SV=1 - [A0A078EC07_BRANA]	Fructose-bisphosphate aldolase (EC 4.1.2.13)	Brassica napus (Rape)	IPR029768;IPR013785;IPR000741;	Fructose-bisphosphate aldolase class-I active site; Aldolase-type TIM barrel; Fructose-bisphosphate aldolase, class-I	GO:0004332; GO:0006096	fructose-bisphosphate aldolase activity [GO:0004332]		glycolytic process [GO:0006096]	390	1.95	42.1375	7.35693	11.28	9	1	4	17	5.9	11.28	5.9	2	4	2	6.32827e+07	6.02123e+07	3.39956e+07	1	1	1	1
D7UNZ6	Glyceradehyde-3-phosphate dehydrogenase (Fragment) OS=Brassica rapa subsp. chinensis GN=BcGAPC PE=2 SV=1 - [D7UNZ6_BRARC]	Glyceradehyde-3-phosphate dehydrogenase (Fragment)	Brassica rapa subsp. chinensis (Pak-choi)	IPR020831;IPR020829;	Glyceraldehyde/Erythrose phosphate dehydrogenase family; Glyceraldehyde 3-phosphate dehydrogenase, catalytic domain	GO:0016620	oxidoreductase activity, acting on the aldehyde or oxo group of donors, NAD or NADP as acceptor [GO:0016620]			160	1	17.335	7.40088	50	56	6	6	14	30.63	34.38	15.63	3	4	2	1.41933e+07	39662260	1.57099e+07	1	1	1	1	1	1	1	1
K9LRW1	Glucanase 1 OS=Brassica rapa subsp. pekinensis GN=Glu1 PE=2 SV=1 - [K9LRW1_BRARP]	Glucanase 1	Brassica rapa subsp. pekinensis (Chinese cabbage) (Brassica pekinensis)	IPR000490;IPR017853;	Glycoside hydrolase family 17; Glycoside hydrolase superfamily	GO:0004553; GO:0005975	hydrolase activity, hydrolyzing O-glycosyl compounds [GO:0004553]		carbohydrate metabolic process [GO:0005975]	341	1.705	37.8573	9.24658	29.62	8	8	8	20	7.62	26.39	17.3	2	7	5	1.27373e+07	2.77076e+07	1.23414e+07	1	1	1	1	1	1	1	1
A0A166EJQ3	Basic endochitinase CHB4-like protein (Fragment) OS=Raphanus sativus var. raphanistroides GN=CHI PE=4 SV=1 - [A0A166EJQ3_RAPSA]	Basic endochitinase CHB4-like protein (Fragment)	Raphanus sativus var. raphanistroides	IPR000726;IPR023346;	Glycoside hydrolase, family 19, catalytic; Lysozyme-like domain	GO:0004568; GO:0006032; GO:0016998	chitinase activity [GO:0004568]		cell wall macromolecule catabolic process [GO:0016998]; chitin catabolic process [GO:0006032]	121	1	13.3834	8.32373	25.62	4	1	3	17	17.36	17.36	25.62	2	2	3	139404178	1.18423e+08	1.02955e+07	1	1	1	1	1	1	1	1
A0A0D3DT09	Uncharacterized protein OS=Brassica oleracea var. oleracea PE=4 SV=1 - [A0A0D3DT09_BRAOL]	Uncharacterized protein	Brassica oleracea var. oleracea	IPR016283;IPR000726;IPR023346;	Glycoside hydrolase, family 19; Glycoside hydrolase, family 19, catalytic; Lysozyme-like domain	GO:0004568; GO:0005975; GO:0006032; GO:0016998	chitinase activity [GO:0004568]		carbohydrate metabolic process [GO:0005975]; cell wall macromolecule catabolic process [GO:0016998]; chitin catabolic process [GO:0006032]	232	1.16	25.4192	4.97021	15.09	4	3	3	8	11.21	15.09	5.17	2	3	1	3.84868e+06	2.04155e+07	4.76272e+06	1	1		1
M4CSZ0	Uncharacterized protein OS=Brassica rapa subsp. pekinensis PE=3 SV=1 - [M4CSZ0_BRARP]	Uncharacterized protein	Brassica rapa subsp. pekinensis (Chinese cabbage) (Brassica pekinensis)	IPR000743;IPR006626;IPR012334;IPR011050;	Glycoside hydrolase, family 28; Parallel beta-helix repeat; Pectin lyase fold; Pectin lyase fold/virulence factor	GO:0004650; GO:0005576; GO:0005975; GO:0071555	polygalacturonase activity [GO:0004650]	extracellular region [GO:0005576]	carbohydrate metabolic process [GO:0005975]; cell wall organization [GO:0071555]	432	2.16	46.8691	7.44482	14.58	5	2	5	15	5.79	14.58	8.56	2	5	3	1.34615e+06	2.18694e+07	1.67189e+07		1	1	1
A0A078G6I2	Lactoylglutathione lyase OS=Brassica napus GN=BnaA08g25110D PE=3 SV=1 - [A0A078G6I2_BRANA]	Lactoylglutathione lyase (EC 4.4.1.5) (Glyoxalase I)	Brassica napus (Rape)	IPR029068;IPR004360;IPR004361;IPR018146;	Glyoxalase/Bleomycin resistance protein/Dihydroxybiphenyl dioxygenase; Glyoxalase/fosfomycin resistance/dioxygenase domain; Glyoxalase I; Glyoxalase I, conserved site	GO:0004462; GO:0046872	lactoylglutathione lyase activity [GO:0004462]; metal ion binding [GO:0046872]			283	1.415	31.8522	5.36377	15.55	7	1	4	25	12.72	15.55	12.72	3	4	3	2.20891e+07	8.31855e+07	2.00011e+07	1	1	1	1
Q39366	Putative lactoylglutathione lyase OS=Brassica oleracea var. gemmifera PE=2 SV=1 - [LGUL_BRAOG]	Putative lactoylglutathione lyase (EC 4.4.1.5) (Aldoketomutase) (Glyoxalase I) (Glx I) (Ketone-aldehyde mutase) (Methylglyoxalase) (S-D-lactoylglutathione methylglyoxal lyase)	Brassica oleracea var. gemmifera (Brussel sprouts)	IPR029068;IPR004360;IPR004361;IPR018146;	Glyoxalase/Bleomycin resistance protein/Dihydroxybiphenyl dioxygenase; Glyoxalase/fosfomycin resistance/dioxygenase domain; Glyoxalase I; Glyoxalase I, conserved site	GO:0004462; GO:0046872	lactoylglutathione lyase activity [GO:0004462]; metal ion binding [GO:0046872]			282	1.41	31.6261	5.26221	13.83	3	1	4	22	10.99	13.83	10.99	3	4	3	4.84035e+07	1.27099e+08	3.78064e+07	1	1	1	1
A0A078FVG4	BnaA08g04080D protein OS=Brassica napus GN=BnaA08g04080D PE=3 SV=1 - [A0A078FVG4_BRANA]	BnaA08g04080D protein	Brassica napus (Rape)	IPR000118;IPR025661;IPR000169;IPR025660;IPR013128;IPR000668;IPR013201;	Granulin; Cysteine peptidase, asparagine active site; Cysteine peptidase, cysteine active site; Cysteine peptidase, histidine active site; Peptidase C1A; Peptidase C1A, papain C-terminal; Cathepsin propeptide inhibitor domain (I29)	GO:0008234	cysteine-type peptidase activity [GO:0008234]			459	2.295	50.6252	5.40186	14.6	9	3	7	21	7.84	11.33	12.85	2	5	4	6.67236e+07	1.54877e+08	4.30196e+07		1	1	1
B1Q3A8	Cysteine protease (Fragment) OS=Brassica rapa var. perviridis GN=BrCP3 PE=3 SV=1 - [B1Q3A8_BRACM]	Cysteine protease (Fragment)	Brassica rapa var. perviridis	IPR000118;IPR025661;IPR000169;IPR025660;IPR013128;IPR000668;IPR013201;	Granulin; Cysteine peptidase, asparagine active site; Cysteine peptidase, cysteine active site; Cysteine peptidase, histidine active site; Peptidase C1A; Peptidase C1A, papain C-terminal; Cathepsin propeptide inhibitor domain (I29)	GO:0008234	cysteine-type peptidase activity [GO:0008234]			431	2.155	47.3724	4.95752	16.71	12	2	7	19	11.37	13.23	13.69	3	5	4	1.49703e+07	9.68372e+07	2.4477e+07	1	1	1	1
A0A078C407	BnaC04g17750D protein OS=Brassica napus GN=BnaC04g17750D PE=3 SV=1 - [A0A078C407_BRANA]	BnaC04g17750D protein	Brassica napus (Rape)	IPR000118;IPR025661;IPR000169;IPR025660;IPR013128;IPR000668;IPR013201;	Granulin; Cysteine peptidase, asparagine active site; Cysteine peptidase, cysteine active site; Cysteine peptidase, histidine active site; Peptidase C1A; Peptidase C1A, papain C-terminal; Cathepsin propeptide inhibitor domain (I29)	GO:0008234	cysteine-type peptidase activity [GO:0008234]			460	2.3	50.5473	5.96045	15.43	11	4	5	18	8.04	15.43	6.52	3	5	2	8.05697e+07	1.53581e+08	3.61838e+07	1	1		1
A0A078C056	Peroxidase OS=Brassica napus GN=BnaC01g25860D PE=3 SV=1 - [A0A078C056_BRANA]	Peroxidase (EC 1.11.1.7)	Brassica napus (Rape)	IPR010255;IPR002016;IPR000823;IPR019794;IPR019793;IPR033905;	Haem peroxidase; Haem peroxidase, plant/fungal/bacterial; Plant peroxidase; Peroxidase, active site; Peroxidases heam-ligand binding site; Secretory peroxidase	GO:0004601; GO:0005576; GO:0006979; GO:0020037; GO:0042744; GO:0046872	heme binding [GO:0020037]; metal ion binding [GO:0046872]; peroxidase activity [GO:0004601]	extracellular region [GO:0005576]	hydrogen peroxide catabolic process [GO:0042744]; response to oxidative stress [GO:0006979]	349	1.745	38.4033	7.62061	24.07	15	4	7	49	14.61	24.07	22.35	4	7	6	1.63133e+08	6.62479e+08	2.6557e+07	1	1	1	1	1	1	1	1
A0A078F449	Peroxidase OS=Brassica napus GN=BnaA06g16150D PE=3 SV=1 - [A0A078F449_BRANA]	Peroxidase (EC 1.11.1.7)	Brassica napus (Rape)	IPR010255;IPR002016;IPR000823;IPR019794;IPR019793;IPR033905;	Haem peroxidase; Haem peroxidase, plant/fungal/bacterial; Plant peroxidase; Peroxidase, active site; Peroxidases heam-ligand binding site; Secretory peroxidase	GO:0004601; GO:0005576; GO:0006979; GO:0020037; GO:0042744; GO:0046872	heme binding [GO:0020037]; metal ion binding [GO:0046872]; peroxidase activity [GO:0004601]	extracellular region [GO:0005576]	hydrogen peroxide catabolic process [GO:0042744]; response to oxidative stress [GO:0006979]	354	1.77	39.0188	6.53662	19.21	15	1	6	39	14.41	19.21	16.95	4	6	5	172995405	6.44914e+08	3.93722e+07	1	1	1	1
M4FFE3	Peroxidase OS=Brassica rapa subsp. pekinensis PE=3 SV=1 - [M4FFE3_BRARP]	Peroxidase (EC 1.11.1.7)	Brassica rapa subsp. pekinensis (Chinese cabbage) (Brassica pekinensis)	IPR010255;IPR002016;IPR000823;IPR019794;IPR019793;IPR033905;	Haem peroxidase; Haem peroxidase, plant/fungal/bacterial; Plant peroxidase; Peroxidase, active site; Peroxidases heam-ligand binding site; Secretory peroxidase	GO:0004601; GO:0005576; GO:0005618; GO:0005773; GO:0006979; GO:0009735; GO:0016020; GO:0020037; GO:0042744; GO:0046872	heme binding [GO:0020037]; metal ion binding [GO:0046872]; peroxidase activity [GO:0004601]	cell wall [GO:0005618]; extracellular region [GO:0005576]; membrane [GO:0016020]; vacuole [GO:0005773]	hydrogen peroxide catabolic process [GO:0042744]; response to cytokinin [GO:0009735]; response to oxidative stress [GO:0006979]	354	1.77	38.9715	7.09326	13.56	22	1	5	20	7.06	6.5	11.3	3	3	4	1.58659e+08	6.12854e+08	1.90623e+07	1	1	1	1
A0A078EA11	Peroxidase OS=Brassica napus GN=BnaC09g48850D PE=3 SV=1 - [A0A078EA11_BRANA]	Peroxidase (EC 1.11.1.7)	Brassica napus (Rape)	IPR010255;IPR002016;IPR000823;IPR019794;IPR019793;IPR033905;	Haem peroxidase; Haem peroxidase, plant/fungal/bacterial; Plant peroxidase; Peroxidase, active site; Peroxidases heam-ligand binding site; Secretory peroxidase	GO:0004601; GO:0005576; GO:0006979; GO:0020037; GO:0042744; GO:0046872	heme binding [GO:0020037]; metal ion binding [GO:0046872]; peroxidase activity [GO:0004601]	extracellular region [GO:0005576]	hydrogen peroxide catabolic process [GO:0042744]; response to oxidative stress [GO:0006979]	358	1.79	37.2725	4.77979	12.01	20	3	4	18	7.54	9.5	5.87	2	3	2	1.65928e+08	1.79963e+08	1.06411e+07	1	1	1	1
A0A078IZ52	Peroxidase OS=Brassica napus GN=BnaC04g56590D PE=3 SV=1 - [A0A078IZ52_BRANA]	Peroxidase (EC 1.11.1.7)	Brassica napus (Rape)	IPR010255;IPR002016;IPR000823;IPR019794;IPR019793;IPR033905;	Haem peroxidase; Haem peroxidase, plant/fungal/bacterial; Plant peroxidase; Peroxidase, active site; Peroxidases heam-ligand binding site; Secretory peroxidase	GO:0004601; GO:0005576; GO:0006979; GO:0020037; GO:0042744; GO:0046872	heme binding [GO:0020037]; metal ion binding [GO:0046872]; peroxidase activity [GO:0004601]	extracellular region [GO:0005576]	hydrogen peroxide catabolic process [GO:0042744]; response to oxidative stress [GO:0006979]	350	1.75	38.9045	7.82568	11.14	20	1	3	11	4.86	8.29	4.86	2	2	2	2.01649e+08	1.64081e+09	1.85091e+07	1	1	1	1
K7N5L9	Peroxidase OS=Raphanus sativus PE=1 SV=1 - [K7N5L9_RAPSA]	Peroxidase (EC 1.11.1.7)	Raphanus sativus (Radish)	IPR010255;IPR002016;IPR000823;IPR019794;IPR019793;IPR033905;	Haem peroxidase; Haem peroxidase, plant/fungal/bacterial; Plant peroxidase; Peroxidase, active site; Peroxidases heam-ligand binding site; Secretory peroxidase	GO:0004601; GO:0005576; GO:0006979; GO:0020037; GO:0042744; GO:0046872	heme binding [GO:0020037]; metal ion binding [GO:0046872]; peroxidase activity [GO:0004601]	extracellular region [GO:0005576]	hydrogen peroxide catabolic process [GO:0042744]; response to oxidative stress [GO:0006979]	308	1.54	31.9256	5.89697	15.58	4	3	4	8	2.92	12.66	10.39	1	3	2	3.20028e+07	9.23537e+07	7.44369e+06		1	1	1
A0A0D3AEW4	Uncharacterized protein OS=Brassica oleracea var. oleracea PE=3 SV=1 - [A0A0D3AEW4_BRAOL]	Uncharacterized protein	Brassica oleracea var. oleracea	IPR018181;IPR029048;IPR029047;IPR013126;	Heat shock protein 70, conserved site; Heat shock protein 70kD, C-terminal domain; Heat shock protein 70kD, peptide-binding domain; Heat shock protein 70 family	GO:0002020; GO:0005524; GO:0005618; GO:0005774; GO:0005794; GO:0005886; GO:0009408; GO:0009506; GO:0009507; GO:0009615; GO:0016363; GO:0022626; GO:0046686; GO:0048046; GO:0080167	ATP binding [GO:0005524]; protease binding [GO:0002020]	apoplast [GO:0048046]; cell wall [GO:0005618]; chloroplast [GO:0009507]; cytosolic ribosome [GO:0022626]; Golgi apparatus [GO:0005794]; nuclear matrix [GO:0016363]; plasma membrane [GO:0005886]; plasmodesma [GO:0009506]; vacuolar membrane [GO:0005774]	response to cadmium ion [GO:0046686]; response to heat [GO:0009408]; response to karrikin [GO:0080167]; response to virus [GO:0009615]	636	3.18	69.3683	5.10986	19.97	56	1	13	74	18.71	17.14	18.55	12	10	12	1.91774e+08	1.67429e+08	2.02869e+08	1	1	1	1
M4F4A9	Uncharacterized protein OS=Brassica rapa subsp. pekinensis PE=3 SV=1 - [M4F4A9_BRARP]	Uncharacterized protein	Brassica rapa subsp. pekinensis (Chinese cabbage) (Brassica pekinensis)	IPR018181;IPR029048;IPR029047;IPR013126;	Heat shock protein 70, conserved site; Heat shock protein 70kD, C-terminal domain; Heat shock protein 70kD, peptide-binding domain; Heat shock protein 70 family	GO:0005524	ATP binding [GO:0005524]			572	2.86	62.7818	5.21143	20.28	21	1	11	71	20.28	20.1	20.28	11	10	11	1.5608e+08	1.67429e+08	8.93174e+07	1	1	1	1	1	1	1	1
A0A078IS30	BnaC01g38510D protein OS=Brassica napus GN=BnaC01g38510D PE=3 SV=1 - [A0A078IS30_BRANA]	BnaC01g38510D protein	Brassica napus (Rape)	IPR018181;IPR029048;IPR029047;IPR013126;	Heat shock protein 70, conserved site; Heat shock protein 70kD, C-terminal domain; Heat shock protein 70kD, peptide-binding domain; Heat shock protein 70 family	GO:0005524	ATP binding [GO:0005524]			647	3.235	71.026	5.24951	23.49	47	3	14	62	13.45	20.87	14.53	9	12	10	1.5608e+08	1.67429e+08	2.02869e+08	1	1	1	1	1	1	1	1
A0A0D3CAN6	Uncharacterized protein OS=Brassica oleracea var. oleracea PE=3 SV=1 - [A0A0D3CAN6_BRAOL]	Uncharacterized protein	Brassica oleracea var. oleracea	IPR018181;IPR029048;IPR029047;IPR013126;	Heat shock protein 70, conserved site; Heat shock protein 70kD, C-terminal domain; Heat shock protein 70kD, peptide-binding domain; Heat shock protein 70 family	GO:0005524	ATP binding [GO:0005524]			647	3.235	70.9573	5.59229	14.68	10	4	8	42	11.75	11.59	10.97	6	7	6	8.42483e+07	6.99827e+07	4.38684e+07	1	1	1	1
A0A0D2ZPJ1	Uncharacterized protein OS=Brassica oleracea var. oleracea PE=3 SV=1 - [A0A0D2ZPJ1_BRAOL]	Uncharacterized protein	Brassica oleracea var. oleracea	IPR018181;IPR029048;IPR029047;IPR013126;	Heat shock protein 70, conserved site; Heat shock protein 70kD, C-terminal domain; Heat shock protein 70kD, peptide-binding domain; Heat shock protein 70 family	GO:0005524	ATP binding [GO:0005524]			632	3.16	69.2981	5.18604	10.76	22	1	7	30	9.49	7.91	9.34	6	4	6	6.94252e+07	3.92231e+07	1.39447e+08	1	1	1	1
M4E219	Uncharacterized protein OS=Brassica rapa subsp. pekinensis PE=3 SV=1 - [M4E219_BRARP]	Uncharacterized protein	Brassica rapa subsp. pekinensis (Chinese cabbage) (Brassica pekinensis)	IPR018181;IPR029048;IPR029047;IPR013126;	Heat shock protein 70, conserved site; Heat shock protein 70kD, C-terminal domain; Heat shock protein 70kD, peptide-binding domain; Heat shock protein 70 family	GO:0005524	ATP binding [GO:0005524]			669	3.345	73.6289	5.21143	10.76	15	3	7	25	5.98	7.32	2.54	4	5	2	8.43143e+07	7.09728e+07	5.06663e+07	1	1		1
A0A078CW02	Histone H2B OS=Brassica napus GN=BnaC09g35280D PE=3 SV=1 - [A0A078CW02_BRANA]	Histone H2B	Brassica napus (Rape)	IPR009072;IPR007125;IPR000558;	Histone-fold; Histone H2A/H2B/H3; Histone H2B	GO:0000786; GO:0003677; GO:0005634; GO:0046982	DNA binding [GO:0003677]; protein heterodimerization activity [GO:0046982]	nucleosome [GO:0000786]; nucleus [GO:0005634]		150	1	16.3841	9.99365	28.67	33	4	4	6	22.67	16	5.33	3	2	1	3.96464e+06	3.06382e+07	3.69665e+06	1	1		1	1	1		1
A0A078H5R4	Histone H4 OS=Brassica napus GN=BnaC08g02310D PE=3 SV=1 - [A0A078H5R4_BRANA]	Histone H4	Brassica napus (Rape)	IPR035425;IPR009072;IPR001951;IPR019809;	Histone-fold; Histone H4; Histone H4, conserved site	GO:0000786; GO:0003677; GO:0005730; GO:0005774; GO:0005829; GO:0005886; GO:0006334; GO:0009414; GO:0009506; GO:0009507; GO:0009579; GO:0046982	DNA binding [GO:0003677]; protein heterodimerization activity [GO:0046982]	chloroplast [GO:0009507]; cytosol [GO:0005829]; nucleolus [GO:0005730]; nucleosome [GO:0000786]; plasma membrane [GO:0005886]; plasmodesma [GO:0009506]; thylakoid [GO:0009579]; vacuolar membrane [GO:0005774]	nucleosome assembly [GO:0006334]; response to water deprivation [GO:0009414]	103	1	11.4024	11.4731	22.33	8	3	3	10	21.36	22.33	11.65	2	3	1	4.42866e+07	1.62163e+07	7.55375e+06	1	1		1	1	1		1
A0A0D3CWX7	Uncharacterized protein OS=Brassica oleracea var. oleracea PE=4 SV=1 - [A0A0D3CWX7_BRAOL]	Uncharacterized protein	Brassica oleracea var. oleracea	IPR011065;IPR002160;	Kunitz inhibitor ST1-like; Proteinase inhibitor I3, Kunitz legume	GO:0004866	endopeptidase inhibitor activity [GO:0004866]			349	1.745	39.4445	4.77979	19.77	3	3	7	98	19.77	19.77	19.77	7	7	6	2.60795e+09	1.66877e+09	7.22976e+08	1	1	1	1
A0A078BU69	BnaA07g22750D protein OS=Brassica napus GN=BnaA07g22750D PE=4 SV=1 - [A0A078BU69_BRANA]	BnaA07g22750D protein	Brassica napus (Rape)	IPR011065;IPR002160;	Kunitz inhibitor ST1-like; Proteinase inhibitor I3, Kunitz legume	GO:0004866	endopeptidase inhibitor activity [GO:0004866]			202	1.01	22.5913	4.93213	22.28	1	0	5	39	22.28	22.28	16.83	5	5	3	9.59267e+08	9.48917e+08	6.11681e+08	1	1	1	1	1	1	1	1
A0A078IH07	BnaA03g50940D protein OS=Brassica napus GN=BnaA03g50940D PE=4 SV=1 - [A0A078IH07_BRANA]	BnaA03g50940D protein	Brassica napus (Rape)	IPR007325;	Kynurenine formamidase	GO:0004061; GO:0019441	arylformamidase activity [GO:0004061]		tryptophan catabolic process to kynurenine [GO:0019441]	259	1.295	28.5297	6.53662	20.85	5	4	4	19	9.65	20.85	9.65	2	4	2	1.15048e+08	1.66701e+08	1.41305e+06	1	1	1	1	1	1	1	1
A0A078GMM3	Malate dehydrogenase OS=Brassica napus GN=BnaA05g14590D PE=3 SV=1 - [A0A078GMM3_BRANA]	Malate dehydrogenase (EC 1.1.1.37)	Brassica napus (Rape)	IPR001557;IPR022383;IPR001236;IPR015955;IPR001252;IPR010097;IPR016040;	L-lactate/malate dehydrogenase; Lactate/malate dehydrogenase, C-terminal; Lactate/malate dehydrogenase, N-terminal; Lactate dehydrogenase/glycoside hydrolase, family 4, C-terminal; Malate dehydrogenase, active site; Malate dehydrogenase, type 1; NAD(P)-binding domain	GO:0005975; GO:0006099; GO:0006108; GO:0030060	L-malate dehydrogenase activity [GO:0030060]		carbohydrate metabolic process [GO:0005975]; malate metabolic process [GO:0006108]; tricarboxylic acid cycle [GO:0006099]	341	1.705	35.7068	8.35303	38.71	16	7	10	59	21.11	38.71	29.91	7	10	8	1.19531e+08	1.1169e+08	6.66427e+07	1	1	1	1	1	1	1	1
A0A0D3CS06	Uncharacterized protein OS=Brassica oleracea var. oleracea PE=4 SV=1 - [A0A0D3CS06_BRAOL]	Uncharacterized protein	Brassica oleracea var. oleracea	IPR032675;IPR001611;IPR003591;IPR013210;	Leucine-rich repeat domain, L domain-like; Leucine-rich repeat; Leucine-rich repeat, typical subtype; Leucine-rich repeat-containing N-terminal, plant-type					479	2.395	52.1175	9.34912	20.88	10	8	8	21	13.78	20.88	9.39	4	8	4	1.04885e+07	1.18924e+07	6.3005e+06	1	1	1	1	1	1	1	1
A0A078CE67	BnaC06g36860D protein OS=Brassica napus GN=BnaC06g36860D PE=4 SV=1 - [A0A078CE67_BRANA]	BnaC06g36860D protein	Brassica napus (Rape)	IPR001117;IPR011706;IPR011707;IPR008972;IPR034273;IPR034275;	Multicopper oxidase, type 1; Multicopper oxidase, type 2; Multicopper oxidase, type 3; Cupredoxin; Ascorbate oxidase homologue, first cupredoxin domain; Ascorbate oxidase homologue, third cupredoxin domain	GO:0005507; GO:0016491	copper ion binding [GO:0005507]; oxidoreductase activity [GO:0016491]			541	2.705	59.7652	8.39697	11.09	29	5	5	21	6.28	11.09	9.24	3	5	4	2.93264e+07	1.83983e+07	3.92604e+06	1	1	1	1
A0A078FEB8	BnaCnng03590D protein OS=Brassica napus GN=BnaCnng03590D PE=4 SV=1 - [A0A078FEB8_BRANA]	BnaCnng03590D protein	Brassica napus (Rape)	IPR016040;	NAD(P)-binding domain					253	1.265	27.1632	6.62451	11.46	5	2	4	8	0	11.46	11.46		4	3	0	6.30291e+07	1.01939e+07		1	1	1
A0A078DU76	BnaC07g41630D protein OS=Brassica napus GN=BnaC07g41630D PE=4 SV=1 - [A0A078DU76_BRANA]	BnaC07g41630D protein	Brassica napus (Rape)	IPR000845;	Nucleoside phosphorylase domain	GO:0003824; GO:0009116	catalytic activity [GO:0003824]		nucleoside metabolic process [GO:0009116]	349	1.745	38.51	5.79541	10.6	1	2	2	32	10.6	10.6	10.6	2	2	2	1.12462e+08	2.8144e+08	4.07687e+07	1	1	1	1
A0A078EB73	Pectinesterase OS=Brassica napus GN=BnaC05g39340D PE=4 SV=1 - [A0A078EB73_BRANA]	Pectinesterase (EC 3.1.1.11)	Brassica napus (Rape)	IPR012334;IPR011050;IPR033131;IPR000070;IPR006501;IPR018040;	Pectin lyase fold; Pectin lyase fold/virulence factor; Pectinesterase, Asp active site; Pectinesterase, catalytic; Pectinesterase inhibitor domain; Pectinesterase, Tyr active site	GO:0004857; GO:0005576; GO:0005618; GO:0030599; GO:0042545; GO:0045330; GO:0045490	aspartyl esterase activity [GO:0045330]; enzyme inhibitor activity [GO:0004857]; pectinesterase activity [GO:0030599]	cell wall [GO:0005618]; extracellular region [GO:0005576]	cell wall modification [GO:0042545]; pectin catabolic process [GO:0045490]	572	2.86	61.7055	8.96826	18.01	75	3	9	51	12.24	18.01	13.81	5	9	6	1.35825e+08	2.35185e+08	1.11941e+08	1	1	1	1
M4DYF3	Pectinesterase OS=Brassica rapa subsp. pekinensis PE=4 SV=1 - [M4DYF3_BRARP]	Pectinesterase (EC 3.1.1.11)	Brassica rapa subsp. pekinensis (Chinese cabbage) (Brassica pekinensis)	IPR012334;IPR011050;IPR033131;IPR000070;IPR006501;IPR018040;	Pectin lyase fold; Pectin lyase fold/virulence factor; Pectinesterase, Asp active site; Pectinesterase, catalytic; Pectinesterase inhibitor domain; Pectinesterase, Tyr active site	GO:0004857; GO:0005576; GO:0005618; GO:0030599; GO:0042545; GO:0045330; GO:0045490	aspartyl esterase activity [GO:0045330]; enzyme inhibitor activity [GO:0004857]; pectinesterase activity [GO:0030599]	cell wall [GO:0005618]; extracellular region [GO:0005576]	cell wall modification [GO:0042545]; pectin catabolic process [GO:0045490]	592	2.96	64.3601	9.27588	13.68	76	2	7	30	9.63	11.82	9.29	4	6	4	4.8245e+07	1.32297e+08	2.34365e+07	1	1	1	1
A0A0D3BB98	Pectinesterase OS=Brassica oleracea var. oleracea PE=4 SV=1 - [A0A0D3BB98_BRAOL]	Pectinesterase (EC 3.1.1.11)	Brassica oleracea var. oleracea	IPR012334;IPR011050;IPR000070;IPR018040;	Pectin lyase fold; Pectin lyase fold/virulence factor; Pectinesterase, catalytic; Pectinesterase, Tyr active site	GO:0005576; GO:0005618; GO:0030599; GO:0042545; GO:0045330; GO:0045490	aspartyl esterase activity [GO:0045330]; pectinesterase activity [GO:0030599]	cell wall [GO:0005618]; extracellular region [GO:0005576]	cell wall modification [GO:0042545]; pectin catabolic process [GO:0045490]	391	1.955	42.5521	6.43018	19.18	6	3	7	25	3.07	19.18	12.02	1	7	4	60210890	1.37163e+08	2.72637e+07		1	1	1
A5YV74	Photosystem II D1 protein (Fragment) OS=Raphanus raphanistrum GN=psbA PE=4 SV=1 - [A5YV74_RAPRA]	Photosystem II D1 protein (Fragment)	Raphanus raphanistrum (Wild radish)	IPR000484;	Photosynthetic reaction centre, L/M	GO:0009507; GO:0009772; GO:0016021; GO:0045156	electron transporter, transferring electrons within the cyclic electron transport pathway of photosynthesis activity [GO:0045156]	chloroplast [GO:0009507]; integral component of membrane [GO:0016021]	photosynthetic electron transport in photosystem II [GO:0009772]	101	1	11.4856	5.26221	35.64	7	3	3	10	24.75	23.76	23.76	2	2	2	4.6653e+07	1.58754e+07	7.3532e+06	1	1	1	1	1	1	1	1
A0A0D3CFB6	Photosystem II CP43 reaction center protein OS=Brassica oleracea var. oleracea PE=3 SV=1 - [A0A0D3CFB6_BRAOL]	Photosystem II CP43 reaction center protein	Brassica oleracea var. oleracea	IPR000484;IPR000932;IPR005869;	Photosynthetic reaction centre, L/M; Photosystem antenna protein-like; Photosystem II CP43 reaction centre protein	GO:0009523; GO:0009533; GO:0009535; GO:0009772; GO:0010287; GO:0016021; GO:0016168; GO:0018298; GO:0045156; GO:0046872	chlorophyll binding [GO:0016168]; electron transporter, transferring electrons within the cyclic electron transport pathway of photosynthesis activity [GO:0045156]; metal ion binding [GO:0046872]	chloroplast stromal thylakoid [GO:0009533]; chloroplast thylakoid membrane [GO:0009535]; integral component of membrane [GO:0016021]; photosystem II [GO:0009523]; plastoglobule [GO:0010287]	photosynthetic electron transport in photosystem II [GO:0009772]; protein-chromophore linkage [GO:0018298]	548	2.74	59.8685	6.0874	10.77	7	4	4	15	10.77	7.85	2.55	4	3	1	5.01716e+07	1.98204e+07	3.25258e+06	1	1		1
A0A078DNQ6	BnaA03g25300D protein OS=Brassica napus GN=BnaA03g25300D PE=4 SV=1 - [A0A078DNQ6_BRANA]	BnaA03g25300D protein	Brassica napus (Rape)	IPR006843;	Plastid lipid-associated protein/fibrillin conserved domain					316	1.58	34.4211	6.82959	15.51	6	2	4	23	15.51	12.03	12.03	4	3	3	6.1708e+07	6.81311e+07	4.27621e+07	1	1	1	1
A0A078D1C0	BnaC01g13750D protein OS=Brassica napus GN=BnaC01g13750D PE=4 SV=1 - [A0A078D1C0_BRANA]	BnaC01g13750D protein	Brassica napus (Rape)	IPR006843;	Plastid lipid-associated protein/fibrillin conserved domain					317	1.585	34.564	4.89404	14.83	6	5	6	19	10.41	14.83	10.41	3	6	3	5.61884e+07	6.3709e+07	4.95393e+07	1	1	1	1
A0A078D737	BnaC07g08100D protein OS=Brassica napus GN=BnaC07g08100D PE=4 SV=1 - [A0A078D737_BRANA]	BnaC07g08100D protein	Brassica napus (Rape)	IPR006843;	Plastid lipid-associated protein/fibrillin conserved domain					273	1.365	29.4845	9.11475	16.48	4	4	4	14	11.72	16.48	4.4	3	4	1	3.06356e+07	5.27935e+07	784125	1	1		1
A0A078FUJ1	BnaA09g20620D protein OS=Brassica napus GN=BnaA09g20620D PE=4 SV=1 - [A0A078FUJ1_BRANA]	BnaA09g20620D protein	Brassica napus (Rape)	IPR006843;	Plastid lipid-associated protein/fibrillin conserved domain					318	1.59	34.8232	5.46533	12.26	5	1	3	13	7.55	12.26	7.55	2	3	2	7.66338e+07	4.67501e+07	5.54053e+07	1	1	1	1
A0A078DT21	BnaA08g16310D protein OS=Brassica napus GN=BnaA08g16310D PE=4 SV=1 - [A0A078DT21_BRANA]	BnaA08g16310D protein	Brassica napus (Rape)	IPR001024;	PLAT/LH2 domain					178	1	19.7137	4.99561	12.36	2	2	2	12	5.62	12.36	12.36	1	2	2	212444574	1.28751e+08	5.43092e+07		1	1	1
M4FBS5	Uncharacterized protein OS=Brassica rapa subsp. pekinensis PE=4 SV=1 - [M4FBS5_BRARP]	Uncharacterized protein	Brassica rapa subsp. pekinensis (Chinese cabbage) (Brassica pekinensis)	IPR001024;	PLAT/LH2 domain					181	1	19.9898	5.31299	17.13	3	1	3	9	17.13	10.5	12.15	3	2	2	4.36633e+07	0	1.89059e+07	1		1	1
A0A078JGR9	BnaCnng52300D protein OS=Brassica napus GN=BnaCnng52300D PE=4 SV=1 - [A0A078JGR9_BRANA]	BnaCnng52300D protein	Brassica napus (Rape)	IPR001024;	PLAT/LH2 domain					182	1	20.1069	5.13525	26.92	3	2	4	8	17.03	15.38	12.09	3	2	2	4.81514e+07	0	1.89059e+07	1		1	1	1		1	1
A0A078CQS6	BnaA01g11190D protein OS=Brassica napus GN=BnaA01g11190D PE=4 SV=1 - [A0A078CQS6_BRANA]	BnaA01g11190D protein	Brassica napus (Rape)	IPR023222;IPR008797;	PsbQ-like domain; Oxygen-evolving enhancer protein 3	GO:0005509; GO:0009654; GO:0015979; GO:0019898	calcium ion binding [GO:0005509]	extrinsic component of membrane [GO:0019898]; photosystem II oxygen evolving complex [GO:0009654]	photosynthesis [GO:0015979]	227	1.135	24.3321	9.70068	16.3	3	3	3	12	16.3	16.3	6.17	3	3	1	6.62332e+06	1.36043e+07	1.11287e+06	1	1		1
J7QBE3	Ribulose bisphosphate carboxylase large chain (Fragment) OS=Diplotaxis tenuifolia GN=rbcL PE=4 SV=1 - [J7QBE3_9BRAS]	Ribulose bisphosphate carboxylase large chain (Fragment)	Diplotaxis tenuifolia	IPR020878;IPR000685;IPR017443;	Ribulose bisphosphate carboxylase, large chain, active site; Ribulose bisphosphate carboxylase, large subunit, C-terminal; Ribulose bisphosphate carboxylase, large subunit, ferrodoxin-like N-terminal	GO:0000287; GO:0015977; GO:0016984	magnesium ion binding [GO:0000287]; ribulose-bisphosphate carboxylase activity [GO:0016984]		carbon fixation [GO:0015977]	193	1	21.5338	5.66846	21.76	39	1	4	15	17.62	15.03	6.22	3	3	1	7.08181e+07	3.08849e+07	3.45782e+06	1	1		1	1	1		1
Q7YNV2	Ribulose bisphosphate carboxylase large chain (Fragment) OS=Cakile maritima GN=rbcL PE=3 SV=1 - [Q7YNV2_CAKMA]	Ribulose bisphosphate carboxylase large chain (EC 4.1.1.39) (Fragment)	Cakile maritima (European searocket)	IPR033966;IPR020878;IPR000685;IPR017443;IPR020888;	RuBisCO; Ribulose bisphosphate carboxylase, large chain, active site; Ribulose bisphosphate carboxylase, large subunit, C-terminal; Ribulose bisphosphate carboxylase, large subunit, ferrodoxin-like N-terminal; Ribulose bisphosphate carboxylase large subunit, type I	GO:0000287; GO:0004497; GO:0009507; GO:0009853; GO:0016984; GO:0019253	magnesium ion binding [GO:0000287]; monooxygenase activity [GO:0004497]; ribulose-bisphosphate carboxylase activity [GO:0016984]	chloroplast [GO:0009507]	photorespiration [GO:0009853]; reductive pentose-phosphate cycle [GO:0019253]	449	2.245	49.4109	6.58057	22.49	117	2	11	53	20.71	19.6	14.48	10	10	6	2.75519e+08	1.24907e+08	4.46272e+07	1	1	1	1	1	1	1	1
A0A1S5SJR9	Ribulose bisphosphate carboxylase large chain OS=Orychophragmus violaceus GN=rbcL PE=3 SV=1 - [A0A1S5SJR9_ORYVI]	Ribulose bisphosphate carboxylase large chain (RuBisCO large subunit) (EC 4.1.1.39)	Orychophragmus violaceus (Chinese violet cress) (Brassica violacea)	IPR033966;IPR020878;IPR000685;IPR017443;IPR020888;	RuBisCO; Ribulose bisphosphate carboxylase, large chain, active site; Ribulose bisphosphate carboxylase, large subunit, C-terminal; Ribulose bisphosphate carboxylase, large subunit, ferrodoxin-like N-terminal; Ribulose bisphosphate carboxylase large subunit, type I	GO:0000287; GO:0004497; GO:0009507; GO:0009853; GO:0016984; GO:0019253	magnesium ion binding [GO:0000287]; monooxygenase activity [GO:0004497]; ribulose-bisphosphate carboxylase activity [GO:0016984]	chloroplast [GO:0009507]	photorespiration [GO:0009853]; reductive pentose-phosphate cycle [GO:0019253]	479	2.395	52.9326	6.39209	20.67	107	1	10	48	19	17.95	13.15	9	9	5	8.19807e+07	5.79026e+07	1.92561e+07	1	1	1	1	1	1	1	1
A0A0D3AQF1	Uncharacterized protein OS=Brassica oleracea var. oleracea PE=4 SV=1 - [A0A0D3AQF1_BRAOL]	Uncharacterized protein	Brassica oleracea var. oleracea	IPR011042;IPR018119;IPR004141;	Six-bladed beta-propeller, TolB-like; Strictosidine synthase, conserved region; Strictosidine synthase	GO:0009058; GO:0016844	strictosidine synthase activity [GO:0016844]		biosynthetic process [GO:0009058]	327	1.635	34.5077	5.52881	16.21	7	5	5	23	16.21	12.84	12.84	4	4	3	5.58557e+07	6.40954e+07	3.34767e+07	1	1	1	1
O22374	Superoxide dismutase [Cu-Zn] OS=Raphanus sativus GN=SOD PE=2 SV=1 - [O22374_RAPSA]	Superoxide dismutase [Cu-Zn] (EC 1.15.1.1)	Raphanus sativus (Radish)	IPR018152;IPR001424;	Superoxide dismutase, copper/zinc, binding site; Superoxide dismutase, copper/zinc binding domain	GO:0004784; GO:0046872	metal ion binding [GO:0046872]; superoxide dismutase activity [GO:0004784]			152	1	15.0864	5.85889	25	9	2	2	8	6.58	25	25	1	2	2	1.85981e+07	1.7681e+07	5.83958e+06		1	1	1		1	1	1
Q9XGS0	Thioredoxin M-type, chloroplastic OS=Brassica napus PE=1 SV=1 - [TRXM_BRANA]	Thioredoxin M-type, chloroplastic (Trx-M)	Brassica napus (Rape)	IPR005746;IPR012336;IPR017937;IPR013766;	Thioredoxin; Thioredoxin-like fold; Thioredoxin, conserved site; Thioredoxin domain	GO:0006662; GO:0009507; GO:0015035; GO:0045454	protein disulfide oxidoreductase activity [GO:0015035]	chloroplast [GO:0009507]	cell redox homeostasis [GO:0045454]; glycerol ether metabolic process [GO:0006662]	177	1	19.2569	9.31982	22.6	5	2	3	29	22.6	22.6	22.6	3	3	3	1.93832e+07	3.6568e+07	7.18602e+06	1	1	1	1	1	1	1	1
A0A078G9A1	BnaC09g00770D protein OS=Brassica napus GN=BnaC09g00770D PE=4 SV=1 - [A0A078G9A1_BRANA]	BnaC09g00770D protein	Brassica napus (Rape)	IPR005746;IPR012336;IPR017937;IPR013766;	Thioredoxin; Thioredoxin-like fold; Thioredoxin, conserved site; Thioredoxin domain	GO:0005623; GO:0006662; GO:0015035; GO:0045454	protein disulfide oxidoreductase activity [GO:0015035]	cell [GO:0005623]	cell redox homeostasis [GO:0045454]; glycerol ether metabolic process [GO:0006662]	183	1	19.8823	8.14795	22.4	4	1	4	17	13.66	22.4	20.22	2	4	3	2.52022e+07	1.36607e+07	6.15289e+06	1	1	1	1	1	1	1	1
A0A0D3BKM1	Uncharacterized protein OS=Brassica oleracea var. oleracea PE=4 SV=1 - [A0A0D3BKM1_BRAOL]	Uncharacterized protein	Brassica oleracea var. oleracea	IPR004161;IPR033720;IPR009000;IPR009001;IPR004160;	Translation elongation factor EFTu-like, domain 2; Elongation factor Tu, domain 2; Translation protein, beta-barrel domain; Translation elongation factor EF1A/initiation factor IF2gamma, C-terminal; Translation elongation factor EFTu/EF1A, C-terminal	GO:0005525	GTP binding [GO:0005525]			206	1.03	22.5998	7.50342	18.93	17	3	3	9	13.11	18.93	7.77	2	3	1	30380342	4.88632e+06	1.79546e+06	1	1		1
A0A078G8C9	BnaC08g43440D protein OS=Brassica napus GN=BnaC08g43440D PE=4 SV=1 - [A0A078G8C9_BRANA]	BnaC08g43440D protein (BnaC08g43450D protein)	Brassica napus (Rape)	IPR004161;IPR027417;IPR000795;IPR009000;IPR009001;IPR004539;IPR004160;	Translation elongation factor EFTu-like, domain 2; P-loop containing nucleoside triphosphate hydrolase; Transcription factor, GTP-binding domain; Translation protein, beta-barrel domain; Translation elongation factor EF1A/initiation factor IF2gamma, C-terminal; Translation elongation factor EF1A, eukaryotic/archaeal; Translation elongation factor EFTu/EF1A, C-terminal	GO:0003746; GO:0003924; GO:0005525; GO:0005737	GTPase activity [GO:0003924]; GTP binding [GO:0005525]; translation elongation factor activity [GO:0003746]	cytoplasm [GO:0005737]		427	2.135	46.7684	9.14404	20.37	29	7	7	27	6.79	20.37	4.45	3	7	2	8.17353e+08	3.38897e+08	8.44234e+06	1	1		1	1	1		1
A0A078K0K2	BnaCnng72870D protein (Fragment) OS=Brassica napus GN=BnaCnng72870D PE=4 SV=1 - [A0A078K0K2_BRANA]	BnaCnng72870D protein (Fragment)	Brassica napus (Rape)	IPR019956;IPR029071;IPR019954;IPR000626;	Ubiquitin; Ubiquitin-related domain; Ubiquitin conserved site; Ubiquitin domain					75	1	8.3815	7.25439	81.33	32	2	10	297	73.33	81.33	81.33	7	9	9	5.9469e+08	5.94094e+08	2.8438e+08	1	1	1	1	1	1	1	1
A0A078GKT6	BnaA08g07930D protein OS=Brassica napus GN=BnaA08g07930D PE=4 SV=1 - [A0A078GKT6_BRANA]	BnaA08g07930D protein (BnaC08g09170D protein)	Brassica napus (Rape)	IPR019956;IPR029071;IPR019954;IPR000626;	Ubiquitin; Ubiquitin-related domain; Ubiquitin conserved site; Ubiquitin domain					154	1	17.1742	5.69385	39.61	4	2	10	285	34.42	38.31	39.61	6	7	9	5.9469e+08	5.94094e+08	2.8069e+08	1	1	1	1	1	1	1	1

## Sheet: present 20% cov
Accession	Description	Protein names	Organism	Interpro_IDs	Interpro_names	Gene ontology IDs	Gene ontology (molecular function)	Gene ontology (cellular component)	Gene ontology (biological process)	# AAs	No. peptides cutoff	MW [kDa]	calc. pI	ΣCoverage	Σ# Proteins	Σ# Unique Peptides	Σ# Peptides	Σ# PSMs	rep1 coverage	rep2 coverage	rep3 coverage	rep1 peptides	rep2 peptides	rep3 peptides	rep1	rep2	rep3	rep1 present 10%cov	rep2 present 10%cov	rep3 present 10%cov	Present 10% cov	rep1 present 20%cov	rep2 present 20%cov	rep3 present 20%cov	Present 20% Cov
A0A1B1YY37	ATP synthase subunit alpha, chloroplastic OS=Cakile arabica GN=atpA PE=3 SV=1 - [A0A1B1YY37_9BRAS]	ATP synthase subunit alpha, chloroplastic (EC 3.6.3.14) (ATP synthase F1 sector subunit alpha) (F-ATPase subunit alpha)	Cakile arabica	IPR023366;IPR000793;IPR033732;IPR005294;IPR020003;IPR004100;IPR000194;IPR027417;	ATP synthase subunit alpha-like domain; ATP synthase, alpha subunit, C-terminal; ATP synthase, F1 complex, alpha subunit nucleotide-binding domain; ATP synthase, F1 complex, alpha subunit; ATPase, alpha/beta subunit, nucleotide-binding domain, active site; ATPase, F1/V1/A1 complex, alpha/beta subunit, N-terminal domain; ATPase, F1/V1/A1 complex, alpha/beta subunit, nucleotide-binding domain; P-lo…	GO:0005524; GO:0009535; GO:0015986; GO:0045261; GO:0046933	ATP binding [GO:0005524]; proton-transporting ATP synthase activity, rotational mechanism [GO:0046933]	chloroplast thylakoid membrane [GO:0009535]; proton-transporting ATP synthase complex, catalytic core F(1) [GO:0045261]	ATP synthesis coupled proton transport [GO:0015986]	507	2.535	55.28	5.13525	31.36	11	10	12	51	28.6	23.67	15.58	10	9	6	2.13549e+08	1.04998e+08	3.36488e+07	1	1	1	1	1	1	1	1
A0A088BGG7	ATP synthase subunit alpha OS=Eruca sativa GN=atp1 PE=3 SV=1 - [A0A088BGG7_ERUSA]	ATP synthase subunit alpha	Eruca sativa (Garden rocket) (Eruca vesicaria subsp. sativa)	IPR023366;IPR000793;IPR033732;IPR005294;IPR020003;IPR004100;IPR000194;IPR027417;	ATP synthase subunit alpha-like domain; ATP synthase, alpha subunit, C-terminal; ATP synthase, F1 complex, alpha subunit nucleotide-binding domain; ATP synthase, F1 complex, alpha subunit; ATPase, alpha/beta subunit, nucleotide-binding domain, active site; ATPase, F1/V1/A1 complex, alpha/beta subunit, N-terminal domain; ATPase, F1/V1/A1 complex, alpha/beta subunit, nucleotide-binding domain; P-lo…	GO:0005524; GO:0005739; GO:0015986; GO:0045261; GO:0046933	ATP binding [GO:0005524]; proton-transporting ATP synthase activity, rotational mechanism [GO:0046933]	mitochondrion [GO:0005739]; proton-transporting ATP synthase complex, catalytic core F(1) [GO:0045261]	ATP synthesis coupled proton transport [GO:0015986]	507	2.535	55.0497	6.32861	23.47	22	8	10	43	11.24	21.5	10.45	5	9	5	8.87507e+07	1.18279e+08	2.46413e+07	1	1	1	1	1	1	1	1
A0A068LAZ4	ATP synthase subunit beta, chloroplastic OS=Raphanus sativus GN=atpB PE=3 SV=1 - [A0A068LAZ4_RAPSA]	ATP synthase subunit beta, chloroplastic (EC 3.6.3.14) (ATP synthase F1 sector subunit beta) (F-ATPase subunit beta)	Raphanus sativus (Radish)	IPR003593;IPR005722;IPR020003;IPR004100;IPR000194;IPR024034;IPR027417;	AAA+ ATPase domain; ATP synthase, F1 complex, beta subunit; ATPase, alpha/beta subunit, nucleotide-binding domain, active site; ATPase, F1/V1/A1 complex, alpha/beta subunit, N-terminal domain; ATPase, F1/V1/A1 complex, alpha/beta subunit, nucleotide-binding domain; ATPase, F1/V1 complex, beta/alpha subunit, C-terminal; P-loop containing nucleoside triphosphate hydrolase	GO:0005524; GO:0009535; GO:0015986; GO:0045261; GO:0046933	ATP binding [GO:0005524]; proton-transporting ATP synthase activity, rotational mechanism [GO:0046933]	chloroplast thylakoid membrane [GO:0009535]; proton-transporting ATP synthase complex, catalytic core F(1) [GO:0045261]	ATP synthesis coupled proton transport [GO:0015986]	498	2.49	53.7662	5.88428	25.9	18	9	10	42	18.07	21.49	15.86	6	9	6	8.20141e+07	1.05055e+08	6.94726e+06	1	1	1	1	1	1	1	1
A0A078I5P1	ATP synthase subunit beta OS=Brassica napus GN=BnaC02g01030D PE=3 SV=1 - [A0A078I5P1_BRANA]	ATP synthase subunit beta (EC 3.6.3.14)	Brassica napus (Rape)	IPR003593;IPR005722;IPR020003;IPR004100;IPR000194;IPR024034;IPR027417;	AAA+ ATPase domain; ATP synthase, F1 complex, beta subunit; ATPase, alpha/beta subunit, nucleotide-binding domain, active site; ATPase, F1/V1/A1 complex, alpha/beta subunit, N-terminal domain; ATPase, F1/V1/A1 complex, alpha/beta subunit, nucleotide-binding domain; ATPase, F1/V1 complex, beta/alpha subunit, C-terminal; P-loop containing nucleoside triphosphate hydrolase	GO:0005524; GO:0015986; GO:0045261; GO:0046933	ATP binding [GO:0005524]; proton-transporting ATP synthase activity, rotational mechanism [GO:0046933]	proton-transporting ATP synthase complex, catalytic core F(1) [GO:0045261]	ATP synthesis coupled proton transport [GO:0015986]	449	2.245	48.5843	5.63037	32.74	22	9	10	41	22.72	20.49	22.94	7	7	7	9.02187e+07	7.55533e+07	6.48464e+06	1	1	1	1	1	1	1	1
A0A0D3A4H8	Uncharacterized protein OS=Brassica oleracea var. oleracea PE=4 SV=1 - [A0A0D3A4H8_BRAOL]	Uncharacterized protein	Brassica oleracea var. oleracea	IPR011583;IPR029070;IPR001223;IPR017853;	Chitinase II; Chitinase insertion domain; Glycoside hydrolase family 18, catalytic domain; Glycoside hydrolase superfamily	GO:0005975; GO:0008061	chitin binding [GO:0008061]		carbohydrate metabolic process [GO:0005975]	380	1.9	41.2254	8.74854	21.05	9	1	5	28	11.05	21.05	15.26	3	5	3	3.09862e+07	3.40104e+07	6.12722e+06	1	1	1	1	1	1	1	1
K9LRW1	Glucanase 1 OS=Brassica rapa subsp. pekinensis GN=Glu1 PE=2 SV=1 - [K9LRW1_BRARP]	Glucanase 1	Brassica rapa subsp. pekinensis (Chinese cabbage) (Brassica pekinensis)	IPR000490;IPR017853;	Glycoside hydrolase family 17; Glycoside hydrolase superfamily	GO:0004553; GO:0005975	hydrolase activity, hydrolyzing O-glycosyl compounds [GO:0004553]		carbohydrate metabolic process [GO:0005975]	341	1.705	37.8573	9.24658	29.62	8	8	8	20	7.62	26.39	17.3	2	7	5	1.27373e+07	2.77076e+07	1.23414e+07	1	1	1	1	1	1	1	1
A0A078J4U4	BnaA01g34980D protein OS=Brassica napus GN=BnaA01g34980D PE=4 SV=1 - [A0A078J4U4_BRANA]	BnaA01g34980D protein	Brassica napus (Rape)	IPR011583;IPR029070;IPR001223;IPR017853;	Chitinase II; Chitinase insertion domain; Glycoside hydrolase family 18, catalytic domain; Glycoside hydrolase superfamily	GO:0005975; GO:0008061	chitin binding [GO:0008061]		carbohydrate metabolic process [GO:0005975]	380	1.9	41.1934	9.0415	22.89	6	1	5	13	5	22.89	9.21	2	5	2	4.14292e+07	3.33027e+07	5.71719e+06	1	1	1	1	1	1	1	1
A0A078GMM3	Malate dehydrogenase OS=Brassica napus GN=BnaA05g14590D PE=3 SV=1 - [A0A078GMM3_BRANA]	Malate dehydrogenase (EC 1.1.1.37)	Brassica napus (Rape)	IPR001557;IPR022383;IPR001236;IPR015955;IPR001252;IPR010097;IPR016040;	L-lactate/malate dehydrogenase; Lactate/malate dehydrogenase, C-terminal; Lactate/malate dehydrogenase, N-terminal; Lactate dehydrogenase/glycoside hydrolase, family 4, C-terminal; Malate dehydrogenase, active site; Malate dehydrogenase, type 1; NAD(P)-binding domain	GO:0005975; GO:0006099; GO:0006108; GO:0030060	L-malate dehydrogenase activity [GO:0030060]		carbohydrate metabolic process [GO:0005975]; malate metabolic process [GO:0006108]; tricarboxylic acid cycle [GO:0006099]	341	1.705	35.7068	8.35303	38.71	16	7	10	59	21.11	38.71	29.91	7	10	8	1.19531e+08	1.1169e+08	6.66427e+07	1	1	1	1	1	1	1	1
J7QBE3	Ribulose bisphosphate carboxylase large chain (Fragment) OS=Diplotaxis tenuifolia GN=rbcL PE=4 SV=1 - [J7QBE3_9BRAS]	Ribulose bisphosphate carboxylase large chain (Fragment)	Diplotaxis tenuifolia	IPR020878;IPR000685;IPR017443;	Ribulose bisphosphate carboxylase, large chain, active site; Ribulose bisphosphate carboxylase, large subunit, C-terminal; Ribulose bisphosphate carboxylase, large subunit, ferrodoxin-like N-terminal	GO:0000287; GO:0015977; GO:0016984	magnesium ion binding [GO:0000287]; ribulose-bisphosphate carboxylase activity [GO:0016984]		carbon fixation [GO:0015977]	193	1	21.5338	5.66846	21.76	39	1	4	15	17.62	15.03	6.22	3	3	1	7.08181e+07	3.08849e+07	3.45782e+06	1	1		1	1	1		1
A0A0D3CL44	Uncharacterized protein OS=Brassica oleracea var. oleracea PE=4 SV=1 - [A0A0D3CL44_BRAOL]	Uncharacterized protein	Brassica oleracea var. oleracea	IPR000866;IPR024706;IPR019479;IPR012336;IPR013766;	Alkyl hydroperoxide reductase subunit C/ Thiol specific antioxidant; Peroxiredoxin, AhpC-type; Peroxiredoxin, C-terminal; Thioredoxin-like fold; Thioredoxin domain	GO:0005623; GO:0045454; GO:0051920	peroxiredoxin activity [GO:0051920]	cell [GO:0005623]	cell redox homeostasis [GO:0045454]	254	1.27	27.9193	5.69385	31.1	19	6	6	29	22.44	25.59	31.1	3	5	6	3.34491e+06	7.24742e+07	1.51903e+07	1	1	1	1	1	1	1	1
Q38HW3	Protein disulfide-isomerase OS=Brassica carinata GN=PDI1 PE=3 SV=1 - [Q38HW3_BRACI]	Protein disulfide-isomerase (EC 5.3.4.1)	Brassica carinata (Ethiopian mustard) (Abyssinian cabbage)	IPR005788;IPR005792;IPR012336;IPR017937;IPR013766;	Disulphide isomerase; Protein disulphide isomerase; Thioredoxin-like fold; Thioredoxin, conserved site; Thioredoxin domain	GO:0003756; GO:0005783; GO:0045454	protein disulfide isomerase activity [GO:0003756]	endoplasmic reticulum [GO:0005783]	cell redox homeostasis [GO:0045454]	509	2.545	55.7062	5.12256	24.17	8	11	11	22	3.14	24.17	10.61	1	11	3	2.14087e+06	1.14574e+08	7.9857e+06		1	1	1		1	1	1
Q9XGS0	Thioredoxin M-type, chloroplastic OS=Brassica napus PE=1 SV=1 - [TRXM_BRANA]	Thioredoxin M-type, chloroplastic (Trx-M)	Brassica napus (Rape)	IPR005746;IPR012336;IPR017937;IPR013766;	Thioredoxin; Thioredoxin-like fold; Thioredoxin, conserved site; Thioredoxin domain	GO:0006662; GO:0009507; GO:0015035; GO:0045454	protein disulfide oxidoreductase activity [GO:0015035]	chloroplast [GO:0009507]	cell redox homeostasis [GO:0045454]; glycerol ether metabolic process [GO:0006662]	177	1	19.2569	9.31982	22.6	5	2	3	29	22.6	22.6	22.6	3	3	3	1.93832e+07	3.6568e+07	7.18602e+06	1	1	1	1	1	1	1	1
A0A078G9A1	BnaC09g00770D protein OS=Brassica napus GN=BnaC09g00770D PE=4 SV=1 - [A0A078G9A1_BRANA]	BnaC09g00770D protein	Brassica napus (Rape)	IPR005746;IPR012336;IPR017937;IPR013766;	Thioredoxin; Thioredoxin-like fold; Thioredoxin, conserved site; Thioredoxin domain	GO:0005623; GO:0006662; GO:0015035; GO:0045454	protein disulfide oxidoreductase activity [GO:0015035]	cell [GO:0005623]	cell redox homeostasis [GO:0045454]; glycerol ether metabolic process [GO:0006662]	183	1	19.8823	8.14795	22.4	4	1	4	17	13.66	22.4	20.22	2	4	3	2.52022e+07	1.36607e+07	6.15289e+06	1	1	1	1	1	1	1	1
A0A166EJQ3	Basic endochitinase CHB4-like protein (Fragment) OS=Raphanus sativus var. raphanistroides GN=CHI PE=4 SV=1 - [A0A166EJQ3_RAPSA]	Basic endochitinase CHB4-like protein (Fragment)	Raphanus sativus var. raphanistroides	IPR000726;IPR023346;	Glycoside hydrolase, family 19, catalytic; Lysozyme-like domain	GO:0004568; GO:0006032; GO:0016998	chitinase activity [GO:0004568]		cell wall macromolecule catabolic process [GO:0016998]; chitin catabolic process [GO:0006032]	121	1	13.3834	8.32373	25.62	4	1	3	17	17.36	17.36	25.62	2	2	3	139404178	1.18423e+08	1.02955e+07	1	1	1	1	1	1	1	1
A0A078E2W5	Pectinesterase OS=Brassica napus GN=BnaC03g25220D PE=4 SV=1 - [A0A078E2W5_BRANA]	Pectinesterase (EC 3.1.1.11)	Brassica napus (Rape)	IPR006633;IPR012334;IPR011050;IPR033131;IPR000070;IPR006501;	Carbohydrate-binding/sugar hydrolysis domain; Pectin lyase fold; Pectin lyase fold/virulence factor; Pectinesterase, Asp active site; Pectinesterase, catalytic; Pectinesterase inhibitor domain	GO:0004857; GO:0005618; GO:0030599; GO:0042545; GO:0045330; GO:0045490	aspartyl esterase activity [GO:0045330]; enzyme inhibitor activity [GO:0004857]; pectinesterase activity [GO:0030599]	cell wall [GO:0005618]	cell wall modification [GO:0042545]; pectin catabolic process [GO:0045490]	445	2.225	48.5215	9.49561	31.69	8	7	11	122	28.99	31.69	27.42	9	11	8	3.69449e+08	5.52131e+08	1.54712e+08	1	1	1	1	1	1	1	1
A0A078EQK7	BnaC04g25470D protein OS=Brassica napus GN=BnaC04g25470D PE=3 SV=1 - [A0A078EQK7_BRANA]	BnaC04g25470D protein	Brassica napus (Rape)	IPR013785;IPR022896;IPR000652;IPR020861;	Aldolase-type TIM barrel; Triosephosphate isomerase, bacterial/eukaryotic; Triosephosphate isomerase; Triosephosphate isomerase, active site	GO:0004807; GO:0006096	triose-phosphate isomerase activity [GO:0004807]		glycolytic process [GO:0006096]	253	1.265	27.001	5.98584	20.16	10	1	4	22	5.53	20.16	11.86	1	4	3	2.95131e+07	2.77504e+07	1.13817e+07		1	1	1		1	1	1
A0A078C056	Peroxidase OS=Brassica napus GN=BnaC01g25860D PE=3 SV=1 - [A0A078C056_BRANA]	Peroxidase (EC 1.11.1.7)	Brassica napus (Rape)	IPR010255;IPR002016;IPR000823;IPR019794;IPR019793;IPR033905;	Haem peroxidase; Haem peroxidase, plant/fungal/bacterial; Plant peroxidase; Peroxidase, active site; Peroxidases heam-ligand binding site; Secretory peroxidase	GO:0004601; GO:0005576; GO:0006979; GO:0020037; GO:0042744; GO:0046872	heme binding [GO:0020037]; metal ion binding [GO:0046872]; peroxidase activity [GO:0004601]	extracellular region [GO:0005576]	hydrogen peroxide catabolic process [GO:0042744]; response to oxidative stress [GO:0006979]	349	1.745	38.4033	7.62061	24.07	15	4	7	49	14.61	24.07	22.35	4	7	6	1.63133e+08	6.62479e+08	2.6557e+07	1	1	1	1	1	1	1	1
A0A078H5R4	Histone H4 OS=Brassica napus GN=BnaC08g02310D PE=3 SV=1 - [A0A078H5R4_BRANA]	Histone H4	Brassica napus (Rape)	IPR035425;IPR009072;IPR001951;IPR019809;	Histone-fold; Histone H4; Histone H4, conserved site	GO:0000786; GO:0003677; GO:0005730; GO:0005774; GO:0005829; GO:0005886; GO:0006334; GO:0009414; GO:0009506; GO:0009507; GO:0009579; GO:0046982	DNA binding [GO:0003677]; protein heterodimerization activity [GO:0046982]	chloroplast [GO:0009507]; cytosol [GO:0005829]; nucleolus [GO:0005730]; nucleosome [GO:0000786]; plasma membrane [GO:0005886]; plasmodesma [GO:0009506]; thylakoid [GO:0009579]; vacuolar membrane [GO:0005774]	nucleosome assembly [GO:0006334]; response to water deprivation [GO:0009414]	103	1	11.4024	11.4731	22.33	8	3	3	10	21.36	22.33	11.65	2	3	1	4.42866e+07	1.62163e+07	7.55375e+06	1	1		1	1	1		1
M4DH11	Plastocyanin OS=Brassica rapa subsp. pekinensis PE=3 SV=1 - [M4DH11_BRARP]	Plastocyanin	Brassica rapa subsp. pekinensis (Chinese cabbage) (Brassica pekinensis)	IPR000923;IPR028871;IPR001235;IPR008972;IPR002387;	Blue (type 1) copper domain; Blue (type 1) copper protein, binding site; Blue (type 1) copper protein, plastocyanin-type; Cupredoxin; Plastocyanin	GO:0005507; GO:0009055; GO:0009535; GO:0055114	copper ion binding [GO:0005507]; electron carrier activity [GO:0009055]	chloroplast thylakoid membrane [GO:0009535]	oxidation-reduction process [GO:0055114]	116	1	11.9909	4.36084	24.14	2	2	2	8	0	24.14	24.14		2	2	0	2.36549e+07	1.587e+07		1	1	1		1	1	1
Q7YNV2	Ribulose bisphosphate carboxylase large chain (Fragment) OS=Cakile maritima GN=rbcL PE=3 SV=1 - [Q7YNV2_CAKMA]	Ribulose bisphosphate carboxylase large chain (EC 4.1.1.39) (Fragment)	Cakile maritima (European searocket)	IPR033966;IPR020878;IPR000685;IPR017443;IPR020888;	RuBisCO; Ribulose bisphosphate carboxylase, large chain, active site; Ribulose bisphosphate carboxylase, large subunit, C-terminal; Ribulose bisphosphate carboxylase, large subunit, ferrodoxin-like N-terminal; Ribulose bisphosphate carboxylase large subunit, type I	GO:0000287; GO:0004497; GO:0009507; GO:0009853; GO:0016984; GO:0019253	magnesium ion binding [GO:0000287]; monooxygenase activity [GO:0004497]; ribulose-bisphosphate carboxylase activity [GO:0016984]	chloroplast [GO:0009507]	photorespiration [GO:0009853]; reductive pentose-phosphate cycle [GO:0019253]	449	2.245	49.4109	6.58057	22.49	117	2	11	53	20.71	19.6	14.48	10	10	6	2.75519e+08	1.24907e+08	4.46272e+07	1	1	1	1	1	1	1	1
A0A1S5SJR9	Ribulose bisphosphate carboxylase large chain OS=Orychophragmus violaceus GN=rbcL PE=3 SV=1 - [A0A1S5SJR9_ORYVI]	Ribulose bisphosphate carboxylase large chain (RuBisCO large subunit) (EC 4.1.1.39)	Orychophragmus violaceus (Chinese violet cress) (Brassica violacea)	IPR033966;IPR020878;IPR000685;IPR017443;IPR020888;	RuBisCO; Ribulose bisphosphate carboxylase, large chain, active site; Ribulose bisphosphate carboxylase, large subunit, C-terminal; Ribulose bisphosphate carboxylase, large subunit, ferrodoxin-like N-terminal; Ribulose bisphosphate carboxylase large subunit, type I	GO:0000287; GO:0004497; GO:0009507; GO:0009853; GO:0016984; GO:0019253	magnesium ion binding [GO:0000287]; monooxygenase activity [GO:0004497]; ribulose-bisphosphate carboxylase activity [GO:0016984]	chloroplast [GO:0009507]	photorespiration [GO:0009853]; reductive pentose-phosphate cycle [GO:0019253]	479	2.395	52.9326	6.39209	20.67	107	1	10	48	19	17.95	13.15	9	9	5	8.19807e+07	5.79026e+07	1.92561e+07	1	1	1	1	1	1	1	1
A5YV74	Photosystem II D1 protein (Fragment) OS=Raphanus raphanistrum GN=psbA PE=4 SV=1 - [A5YV74_RAPRA]	Photosystem II D1 protein (Fragment)	Raphanus raphanistrum (Wild radish)	IPR000484;	Photosynthetic reaction centre, L/M	GO:0009507; GO:0009772; GO:0016021; GO:0045156	electron transporter, transferring electrons within the cyclic electron transport pathway of photosynthesis activity [GO:0045156]	chloroplast [GO:0009507]; integral component of membrane [GO:0016021]	photosynthetic electron transport in photosystem II [GO:0009772]	101	1	11.4856	5.26221	35.64	7	3	3	10	24.75	23.76	23.76	2	2	2	4.6653e+07	1.58754e+07	7.3532e+06	1	1	1	1	1	1	1	1
A0A078IH07	BnaA03g50940D protein OS=Brassica napus GN=BnaA03g50940D PE=4 SV=1 - [A0A078IH07_BRANA]	BnaA03g50940D protein	Brassica napus (Rape)	IPR007325;	Kynurenine formamidase	GO:0004061; GO:0019441	arylformamidase activity [GO:0004061]		tryptophan catabolic process to kynurenine [GO:0019441]	259	1.295	28.5297	6.53662	20.85	5	4	4	19	9.65	20.85	9.65	2	4	2	1.15048e+08	1.66701e+08	1.41305e+06	1	1	1	1	1	1	1	1
A0A078K0K2	BnaCnng72870D protein (Fragment) OS=Brassica napus GN=BnaCnng72870D PE=4 SV=1 - [A0A078K0K2_BRANA]	BnaCnng72870D protein (Fragment)	Brassica napus (Rape)	IPR019956;IPR029071;IPR019954;IPR000626;	Ubiquitin; Ubiquitin-related domain; Ubiquitin conserved site; Ubiquitin domain					75	1	8.3815	7.25439	81.33	32	2	10	297	73.33	81.33	81.33	7	9	9	5.9469e+08	5.94094e+08	2.8438e+08	1	1	1	1	1	1	1	1
A0A078GKT6	BnaA08g07930D protein OS=Brassica napus GN=BnaA08g07930D PE=4 SV=1 - [A0A078GKT6_BRANA]	BnaA08g07930D protein (BnaC08g09170D protein)	Brassica napus (Rape)	IPR019956;IPR029071;IPR019954;IPR000626;	Ubiquitin; Ubiquitin-related domain; Ubiquitin conserved site; Ubiquitin domain					154	1	17.1742	5.69385	39.61	4	2	10	285	34.42	38.31	39.61	6	7	9	5.9469e+08	5.94094e+08	2.8069e+08	1	1	1	1	1	1	1	1
M4F4A9	Uncharacterized protein OS=Brassica rapa subsp. pekinensis PE=3 SV=1 - [M4F4A9_BRARP]	Uncharacterized protein	Brassica rapa subsp. pekinensis (Chinese cabbage) (Brassica pekinensis)	IPR018181;IPR029048;IPR029047;IPR013126;	Heat shock protein 70, conserved site; Heat shock protein 70kD, C-terminal domain; Heat shock protein 70kD, peptide-binding domain; Heat shock protein 70 family	GO:0005524	ATP binding [GO:0005524]			572	2.86	62.7818	5.21143	20.28	21	1	11	71	20.28	20.1	20.28	11	10	11	1.5608e+08	1.67429e+08	8.93174e+07	1	1	1	1	1	1	1	1
A0A078IS30	BnaC01g38510D protein OS=Brassica napus GN=BnaC01g38510D PE=3 SV=1 - [A0A078IS30_BRANA]	BnaC01g38510D protein	Brassica napus (Rape)	IPR018181;IPR029048;IPR029047;IPR013126;	Heat shock protein 70, conserved site; Heat shock protein 70kD, C-terminal domain; Heat shock protein 70kD, peptide-binding domain; Heat shock protein 70 family	GO:0005524	ATP binding [GO:0005524]			647	3.235	71.026	5.24951	23.49	47	3	14	62	13.45	20.87	14.53	9	12	10	1.5608e+08	1.67429e+08	2.02869e+08	1	1	1	1	1	1	1	1
A0A078F0M0	BnaC02g41060D protein OS=Brassica napus GN=BnaC02g41060D PE=4 SV=1 - [A0A078F0M0_BRANA]	BnaC02g41060D protein	Brassica napus (Rape)	IPR005519;IPR010028;IPR014403;IPR023214;	Acid phosphatase, class B-like; Acid phosphatase, plant; Vegetative storage protein/acid phosphatase; HAD-like domain	GO:0003993	acid phosphatase activity [GO:0003993]			268	1.34	30.588	6.93213	21.27	1	3	8	52	11.94	21.27	19.03	3	8	5	5.24418e+07	6.02158e+08	9.40728e+07	1	1	1	1	1	1	1	1
A0A078BU69	BnaA07g22750D protein OS=Brassica napus GN=BnaA07g22750D PE=4 SV=1 - [A0A078BU69_BRANA]	BnaA07g22750D protein	Brassica napus (Rape)	IPR011065;IPR002160;	Kunitz inhibitor ST1-like; Proteinase inhibitor I3, Kunitz legume	GO:0004866	endopeptidase inhibitor activity [GO:0004866]			202	1.01	22.5913	4.93213	22.28	1	0	5	39	22.28	22.28	16.83	5	5	3	9.59267e+08	9.48917e+08	6.11681e+08	1	1	1	1	1	1	1	1
A0A078HGR1	BnaC03g41600D protein OS=Brassica napus GN=BnaC03g41600D PE=4 SV=1 - [A0A078HGR1_BRANA]	BnaC03g41600D protein	Brassica napus (Rape)	IPR013813;IPR006056;IPR019897;IPR006175;	Endoribonuclease L-PSP/chorismate mutase-like; RidA family; RidA, conserved site; YjgF/YER057c/UK114 family					180	1	19.2752	8.79248	30.56	5	1	5	30	26.67	30.56	30.56	4	5	5	1.98037e+07	4.61944e+07	2.12739e+07	1	1	1	1	1	1	1	1
A0A078G9C9	BnaA10g22340D protein OS=Brassica napus GN=BnaC09g46850D PE=3 SV=1 - [A0A078G9C9_BRANA]	BnaA10g22340D protein (BnaC09g46850D protein)	Brassica napus (Rape)	IPR004000;IPR020902;IPR004001;	Actin family; Actin/actin-like conserved site; Actin, conserved site	GO:0005524	ATP binding [GO:0005524]			377	1.885	41.663	5.49072	20.69	82	6	6	28	16.45	10.34	14.59	5	3	4	3.85896e+08	2.07196e+08	1.48843e+08	1	1	1	1	1	1	1	1
A0A078G8C9	BnaC08g43440D protein OS=Brassica napus GN=BnaC08g43440D PE=4 SV=1 - [A0A078G8C9_BRANA]	BnaC08g43440D protein (BnaC08g43450D protein)	Brassica napus (Rape)	IPR004161;IPR027417;IPR000795;IPR009000;IPR009001;IPR004539;IPR004160;	Translation elongation factor EFTu-like, domain 2; P-loop containing nucleoside triphosphate hydrolase; Transcription factor, GTP-binding domain; Translation protein, beta-barrel domain; Translation elongation factor EF1A/initiation factor IF2gamma, C-terminal; Translation elongation factor EF1A, eukaryotic/archaeal; Translation elongation factor EFTu/EF1A, C-terminal	GO:0003746; GO:0003924; GO:0005525; GO:0005737	GTPase activity [GO:0003924]; GTP binding [GO:0005525]; translation elongation factor activity [GO:0003746]	cytoplasm [GO:0005737]		427	2.135	46.7684	9.14404	20.37	29	7	7	27	6.79	20.37	4.45	3	7	2	8.17353e+08	3.38897e+08	8.44234e+06	1	1		1	1	1		1
A0A078IX60	BnaA05g36080D protein OS=Brassica napus GN=BnaA05g36080D PE=4 SV=1 - [A0A078IX60_BRANA]	BnaA05g36080D protein	Brassica napus (Rape)	IPR013813;IPR006056;IPR019897;IPR006175;	Endoribonuclease L-PSP/chorismate mutase-like; RidA family; RidA, conserved site; YjgF/YER057c/UK114 family					188	1	19.8404	8.39697	31.38	6	1	5	26	17.55	31.38	21.28	3	5	4	1.78782e+07	4.24153e+07	1.48344e+07	1	1	1	1	1	1	1	1
Q84WW8	Calmodulin 1 (Fragment) OS=Brassica oleracea GN=cam1 PE=2 SV=1 - [Q84WW8_BRAOL]	Calmodulin 1 (Fragment)	Brassica oleracea (Wild cabbage)	IPR011992;IPR018247;IPR002048;IPR023198;	EF-hand domain pair; EF-Hand 1, calcium-binding site; EF-hand domain; Phosphoglycolate phosphatase, domain 2	GO:0005509	calcium ion binding [GO:0005509]			137	1	15.4763	4.36084	48.18	24	1	3	25	21.17	48.18	48.18	2	3	3	3.61587e+07	6.32208e+07	1.84257e+07	1	1	1	1	1	1	1	1
A0A0D3CS06	Uncharacterized protein OS=Brassica oleracea var. oleracea PE=4 SV=1 - [A0A0D3CS06_BRAOL]	Uncharacterized protein	Brassica oleracea var. oleracea	IPR032675;IPR001611;IPR003591;IPR013210;	Leucine-rich repeat domain, L domain-like; Leucine-rich repeat; Leucine-rich repeat, typical subtype; Leucine-rich repeat-containing N-terminal, plant-type					479	2.395	52.1175	9.34912	20.88	10	8	8	21	13.78	20.88	9.39	4	8	4	1.04885e+07	1.18924e+07	6.3005e+06	1	1	1	1	1	1	1	1
A0A078FGE9	BnaA06g20230D protein OS=Brassica napus GN=BnaA06g20230D PE=4 SV=1 - [A0A078FGE9_BRANA]	BnaA06g20230D protein	Brassica napus (Rape)	IPR011992;IPR018247;IPR002048;IPR023198;	EF-hand domain pair; EF-Hand 1, calcium-binding site; EF-hand domain; Phosphoglycolate phosphatase, domain 2	GO:0005509	calcium ion binding [GO:0005509]			145	1	16.3927	4.36084	42.76	6	1	3	17	8.97	42.76	42.76	1	3	3	1.78987e+07	2.06157e+07	9.49548e+06		1	1	1		1	1	1
D7UNZ6	Glyceradehyde-3-phosphate dehydrogenase (Fragment) OS=Brassica rapa subsp. chinensis GN=BcGAPC PE=2 SV=1 - [D7UNZ6_BRARC]	Glyceradehyde-3-phosphate dehydrogenase (Fragment)	Brassica rapa subsp. chinensis (Pak-choi)	IPR020831;IPR020829;	Glyceraldehyde/Erythrose phosphate dehydrogenase family; Glyceraldehyde 3-phosphate dehydrogenase, catalytic domain	GO:0016620	oxidoreductase activity, acting on the aldehyde or oxo group of donors, NAD or NADP as acceptor [GO:0016620]			160	1	17.335	7.40088	50	56	6	6	14	30.63	34.38	15.63	3	4	2	1.41933e+07	39662260	1.57099e+07	1	1	1	1	1	1	1	1
A0A078JGR9	BnaCnng52300D protein OS=Brassica napus GN=BnaCnng52300D PE=4 SV=1 - [A0A078JGR9_BRANA]	BnaCnng52300D protein	Brassica napus (Rape)	IPR001024;	PLAT/LH2 domain					182	1	20.1069	5.13525	26.92	3	2	4	8	17.03	15.38	12.09	3	2	2	4.81514e+07	0	1.89059e+07	1		1	1	1		1	1
O22374	Superoxide dismutase [Cu-Zn] OS=Raphanus sativus GN=SOD PE=2 SV=1 - [O22374_RAPSA]	Superoxide dismutase [Cu-Zn] (EC 1.15.1.1)	Raphanus sativus (Radish)	IPR018152;IPR001424;	Superoxide dismutase, copper/zinc, binding site; Superoxide dismutase, copper/zinc binding domain	GO:0004784; GO:0046872	metal ion binding [GO:0046872]; superoxide dismutase activity [GO:0004784]			152	1	15.0864	5.85889	25	9	2	2	8	6.58	25	25	1	2	2	1.85981e+07	1.7681e+07	5.83958e+06		1	1	1		1	1	1
A0A078CW02	Histone H2B OS=Brassica napus GN=BnaC09g35280D PE=3 SV=1 - [A0A078CW02_BRANA]	Histone H2B	Brassica napus (Rape)	IPR009072;IPR007125;IPR000558;	Histone-fold; Histone H2A/H2B/H3; Histone H2B	GO:0000786; GO:0003677; GO:0005634; GO:0046982	DNA binding [GO:0003677]; protein heterodimerization activity [GO:0046982]	nucleosome [GO:0000786]; nucleus [GO:0005634]		150	1	16.3841	9.99365	28.67	33	4	4	6	22.67	16	5.33	3	2	1	3.96464e+06	3.06382e+07	3.69665e+06	1	1		1	1	1		1
